# Supplementary material for: Technical capacities needed to implement the WHO’s primary eye care package for Africa: results of a Delphi process
Source: PubMed Central journal article supplement — BMJ Open. 2021 Mar 19;11(3):e042979. doi: 10.1136/bmjopen-2020-042979 (PMC7986885; doi:10.1136/bmjopen-2020-042979), 2021-03-19
Supplement: bmjopen-2020-042979.draft_revisions.pdf [file bmjopen-2020-042979.draft_revisions.pdf]

# BMJ Open

BMJ Open is committed to open peer review. As part of this commitment we make the peer review history of every article we publish publicly available.

When an article is published we post the peer reviewers' comments and the authors' responses online. We also post the versions of the paper that were used during peer review. These are the versions that the peer review comments apply to.

The versions of the paper that follow are the versions that were submitted during the peer review process. They are not the versions of record or the final published versions. They should not be cited or distributed as the published version of this manuscript.

BMJ Open is an open access journal and the full, final, typeset and author-corrected version of record of the manuscript is available on our site with no access controls, subscription charges or pay-per-view fees (<http://bmjopen.bmj.com>).

If you have any questions on BMJ Open's open peer review process please email [info.bmjopen@bmj.com](mailto:info.bmjopen@bmj.com)

# BMJ Open

## Technical capacities needed to implement the World Health Organization's primary eye care package for Africa: results of a Delphi process

|                               |                                                                                                                                                                                                                                                                                                                                                                                                                                                                                                                                                                                                                                                                                                                                                                                                    |
|-------------------------------|----------------------------------------------------------------------------------------------------------------------------------------------------------------------------------------------------------------------------------------------------------------------------------------------------------------------------------------------------------------------------------------------------------------------------------------------------------------------------------------------------------------------------------------------------------------------------------------------------------------------------------------------------------------------------------------------------------------------------------------------------------------------------------------------------|
| Journal:                      | <i>BMJ Open</i>                                                                                                                                                                                                                                                                                                                                                                                                                                                                                                                                                                                                                                                                                                                                                                                    |
| Manuscript ID                 | bmjopen-2020-042979                                                                                                                                                                                                                                                                                                                                                                                                                                                                                                                                                                                                                                                                                                                                                                                |
| Article Type:                 | Original research                                                                                                                                                                                                                                                                                                                                                                                                                                                                                                                                                                                                                                                                                                                                                                                  |
| Date Submitted by the Author: | 24-Jul-2020                                                                                                                                                                                                                                                                                                                                                                                                                                                                                                                                                                                                                                                                                                                                                                                        |
| Complete List of Authors:     | Aghaji, Ada; London School of Hygiene & Tropical Medicine; University of Nigeria Faculty of Medical Sciences<br>Burchett, Helen; London School of Hygiene and Tropical Medicine Faculty of Public Health and Policy, Global Health and Development<br>Mathenge, Wanjiku<br>Faal, Hannah; African Vision Research Institute; University of Calabar, Ophthalmology<br>Umeh, Rich; University of Nigeria Faculty of Medical Sciences, Ophthalmology<br>Ezepue, Felix; University of Nigeria Faculty of Medical Sciences, Ophthalmology<br>Isiyaku, Sunday; Sight Savers International<br>Kyari, Fatima; Baze University<br>Wiafe, Boateng<br>Foster, Allen; London School of Hygiene & Tropical Medicine<br>Gilbert, Clare; London School of Hygiene & Tropical Medicine, Clinical Research Unit, ITD |
| Keywords:                     | PUBLIC HEALTH, OPHTHALMOLOGY, Protocols & guidelines < HEALTH SERVICES ADMINISTRATION & MANAGEMENT                                                                                                                                                                                                                                                                                                                                                                                                                                                                                                                                                                                                                                                                                                 |
|                               |                                                                                                                                                                                                                                                                                                                                                                                                                                                                                                                                                                                                                                                                                                                                                                                                    |

SCHOLARONE™  
Manuscripts

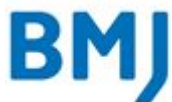

I, the Submitting Author has the right to grant and does grant on behalf of all authors of the Work (as defined in the below author licence), an exclusive licence and/or a non-exclusive licence for contributions from authors who are: i) UK Crown employees; ii) where BMJ has agreed a CC-BY licence shall apply, and/or iii) in accordance with the terms applicable for US Federal Government officers or employees acting as part of their official duties; on a worldwide, perpetual, irrevocable, royalty-free basis to BMJ Publishing Group Ltd ("BMJ") its licensees and where the relevant Journal is co-owned by BMJ to the co-owners of the Journal, to publish the Work in this journal and any other BMJ products and to exploit all rights, as set out in our [licence](#).

The Submitting Author accepts and understands that any supply made under these terms is made by BMJ to the Submitting Author unless you are acting as an employee on behalf of your employer or a postgraduate student of an affiliated institution which is paying any applicable article publishing charge ("APC") for Open Access articles. Where the Submitting Author wishes to make the Work available on an Open Access basis (and intends to pay the relevant APC), the terms of reuse of such Open Access shall be governed by a Creative Commons licence – details of these licences and which [Creative Commons](#) licence will apply to this Work are set out in our licence referred to above.

Other than as permitted in any relevant BMJ Author's Self Archiving Policies, I confirm this Work has not been accepted for publication elsewhere, is not being considered for publication elsewhere and does not duplicate material already published. I confirm all authors consent to publication of this Work and authorise the granting of this licence.

1  
2  
3 **Technical capacities needed to implement the World Health Organization's primary**  
4 **eye care package for Africa: results of a Delphi process**  
5  
6  
7

8 Aghaji, Ada <sup>1,2</sup>; Burchett, Helen <sup>3</sup>; Mathenge, Wanjiku <sup>4</sup>; Faal, Hannah <sup>5</sup>; Umeh, Rich <sup>2</sup>;  
9 Ezepue, Felix <sup>2</sup>; Isiyaku, Sunday <sup>6</sup>; Kyari, Fatima<sup>7</sup>; Wiafe, Boateng<sup>8</sup>; Foster, Allen<sup>1</sup>; Gilbert,  
10 Clare<sup>1</sup>  
11  
12  
13  
14  
15

- 16 1. International Centre for Eye Health, London School of Hygiene & Tropical Medicine
- 17 2. Department of Ophthalmology, College of Medicine, University of Nigeria
- 18 3. Faculty of Public Health and Policy, London School of Hygiene & Tropical Medicine
- 19 4. Rwanda International Institute of Ophthalmology, Kigali
- 20 5. Department of Ophthalmology, University of Calabar, Calabar, Nigeria
- 21 6. Sightsavers, Nigeria & Ghana
- 22 7. Baze University, Abuja.
- 23 8. Operation Eyesight, Ghana
- 24
- 25
- 26
- 27
- 28
- 29

30 Corresponding author Aghaji Ada

31 [aaghaji@yahoo.co.uk](mailto:aaghaji@yahoo.co.uk), [ada.aghaji@unn.edu.ng](mailto:ada.aghaji@unn.edu.ng)

32 <https://orcid.org/0000-0003-1308-447X>  
33  
34  
35  
36

37 Key words; Delphi, Primary eye care, feasibility, sub Saharan Africa, feasibility, technical  
38 capacity  
39

40 Word count 3149  
41  
42  
43  
44  
45  
46  
47  
48  
49  
50  
51  
52  
53  
54  
55  
56  
57  
58  
59  
60

## Technical capacities needed to implement the World Health Organization's primary eye care package for sub-Saharan Africa: results of a Delphi process

### ABSTRACT

**Objective** The aim of the study was to establish the technical capacities needed to deliver WHO AFRO's primary eye care package in primary health care facilities.

**Design** A two-round Delphi exercise was used to derive expert consensus on the technical complexity of each component of the package using Gericke's framework of technical feasibility, and then the technical capacities needed to deliver them. The panel comprised nine eyecare experts in primary eyecare in sub-Saharan Africa. In each round panel members used a 4-point Likert scale to express their agreement, and consensus was predefined as  $\geq 70\%$  agreement on each statement. For round 1, statements on technical complexity were identified through a literature search of primary eyecare in sub-Saharan Africa. The capacities needed to deliver each agreed item in the technical complexity framework were identified for round 2.

**Results** Technical complexity statements were classified into four broad elements: intervention characteristics, delivery characteristics, government capacity requirements and usage characteristics. 34 of the 38 (89%) statements on health promotion and 40 of the 43 (93%) statements on facility case management were considered necessary technical capacities for implementation.

**Conclusion** This study established the technical capacities needed to implement the WHO AFRO primary eye care package which may be generalizable to countries in Sub-Saharan Africa

### Article Summary

#### Strengths and limitations of this study

- This is the first study to establish the technical capacities needed to implement primary eye care in sub-Saharan Africa.
- A recognised technical feasibility framework was used, and statements were derived from a literature review of primary eye care in sub-Saharan Africa.
- A Delphi exercise was used to garner expert opinion and to reach consensus.
- Our expert panel was a non-random sample, and this may have led to hidden biases as the participants may not be representative of all the experts with the pre-determined inclusion criteria.

## INTRODUCTION

### Scope of the problem

Estimates from sub-Saharan Africa (SSA) indicate that about 22 million people are blind or visually impaired, mainly from avoidable causes such as cataract and uncorrected refractive errors. In addition, over 100 million people in SSA are estimated to have near visual impairment.(1) The age standardised prevalence of blindness ( $\geq 50$  years) is highest of all world regions, being in 5.1% in western and 4.3% eastern sub-Saharan Africa (2) and much of the regional variation in prevalence is explained by variability in access to eye care.[3] Although there are limited data on regional estimates for non-visually impairing conditions (NVICs) in SSA, such as allergic/infective conjunctivitis, and dry eye syndrome, studies of the prevalence of NVICs in Kenya and Nigeria are estimated to be 15% and 25% respectively.(3, 4) These figures suggest a high need for eye care services in SSA, yet only 30% of Africans have access to eye care.(5)

### Primary Eye care in sub-Saharan Africa

The inclusion of primary eye care (PEC) into primary health care (PHC) has been recommended as a strategy to increase access to eye care services, (6) (7) and there is global and regional support for PEC. (8) Indeed, the World Health Organisation (WHO) through the Global Action Plan 2014-2019, reiterates the importance of accessible eye care services for the effective control of blindness and visual impairment, and calls on member states to secure the inclusion of PEC within PHC.(9) However, a literature review of PEC in SSA reported many challenges to effective implementation of PEC, which included lack of agreement on the scope of PEC which affects the scope of training and supervision, and lack of clear guidelines on the technical eye related skills required by PHC workers.(10) In response to this, the WHO Africa Office (WHO AFRO) recently developed and pilot tested a package of interventions for PEC in SSA. The WHO AFRO PEC Package consists of eight elements which cover two broad areas i.e. health promotion and facility based case management (11, 12) For health promotion the package has (two elements): 1. four sets of health messages for healthy people, people at risk of and with eye diseases, for children and carers, those aged 40 and above, people of all ages and those with diabetes and 2. instructions on how to give a health talk. For facility-based case management the package has six elements 1. five evidence-based algorithms for red eye, eye swelling, trauma, vision loss for distance and near, and children 0-5 years, 2. a set of 12 evidence-based protocols covering five topics: how to measure visual acuity (VA), how to cover an eye, medication, referrals, removal of foreign bodies), 3. A training package (curriculum and materials), 4. Core lists of essential consumables, technologies and medicines, 5. a set of 10 standards and indicators for monitoring and evaluation and 6. templates to collect health information, monitoring and evaluation. Although this health initiative has the potential to increase

1  
2  
3 coverage of eye health services in sub-Saharan Africa (SSA),[16] not all health initiatives  
4 proposed may be feasible to implement. Feasibility research can help identify the challenges  
5 as well as opportunities in implementing a new health initiative. Feasibility in relation to  
6 health initiatives is a multifaceted construct which Snowdon described as having the  
7 following components: technical, political, cultural, financial and legal feasibility, (13) and the  
8 technical feasibility component was selected for this study. Technical feasibility is a balance  
9 between how complex the intervention is and the technical capacities required to implement  
10 it.(14)

11 The WHO AFRO PEC package has many different technical components, and the overall  
12 purpose of this study was to assess the feasibility of integrating the package into PHC in  
13 SSA. In this paper we report the processes involved in developing the content of the  
14 feasibility framework for PEC for use in PHC settings in sub-Saharan African countries.

## 22 **METHODS**

23 Our approach was framed by awareness of the limited published literature on the  
24 effectiveness of PEC in sub-Saharan Africa (10) and the need to adopt a systematic method  
25 to provide expert consensus on the feasibility of PEC implementation to guide policy makers.  
26 Against this backdrop, we used a combination of methods: literature reviews of feasibility  
27 frameworks for public health interventions, and of PEC in SSA and a Delphi process. The  
28 Delphi method is an iterative method of collecting opinions from a group of experts where  
29 evidence from other more robust sources is not available. It uses a series of questionnaires,  
30 and responses are modified based on feedback.(15) The Delphi process has been used in a  
31 wide variety of research areas, including health research.(16) The classic Delphi process is  
32 characterised by a) anonymity of the participants to each other, which encourages free  
33 expression of opinion, b) iteration, c) controlled feedback from the group, and d) statistical  
34 aggregation of the group response.(16)

### 46 **Step 1. Delphi Questionnaire Development**

47 The WHO AFRO PEC package was divided into two components: eye health  
48 prevention/promotion and case management.

49 An appropriate technical feasibility framework was identified. PubMed was searched from  
50 January 2000 to April 2018 using the search terms “technical feasibility” and “frameworks.”  
51 The titles and abstracts of articles identified by the search strategy were screened, and  
52 potential full text articles were reviewed by a single author (AA), Figure 1A.

53 Figure 1. Literature searches for A, technical feasibility framework, and B primary eye care in  
54 sub-Saharan Africa.  
55  
56  
57  
58  
59  
60

The conceptual framework to evaluate the technical complexity of public health interventions selected for this study, which was developed by Gericke et al(14) has four dimensions: basic characteristics of the intervention, delivery characteristics, government capacity/need for regulation or legislation, and usage characteristics(14)(Table 1). Gericke's framework has been used to determine the technical complexity of condom social marketing for the prevention of HIV/AIDS and other sexually transmitted diseases(14) and to assess aflatoxin risk reduction strategies in Africa, for example.(17) For an intervention to be deemed feasible, the technical capacity must match the technical complexity of the intervention, thus intervention complexity complements the concept of institutional capacity.(14)

**Table 1: Technical feasibility framework(14)**

| <b>Gericke's framework</b>              |                                                                       |
|-----------------------------------------|-----------------------------------------------------------------------|
| <b>Category</b>                         | <b>Criteria</b>                                                       |
| <b>Intervention characteristics</b>     |                                                                       |
| Basic product design                    | Stability                                                             |
|                                         | Standardizability                                                     |
|                                         | Safety profile                                                        |
|                                         | Ease of storage                                                       |
|                                         | Ease of transport                                                     |
| Supplies                                | Need for regular supplies                                             |
| Equipment                               | High-technology equipment and infrastructure needed                   |
|                                         | Ease of acquisition                                                   |
|                                         | Number of different types of equipment needed                         |
|                                         | Maintenance needed                                                    |
| <b>Delivery characteristics</b>         |                                                                       |
| Facilities                              | Outreach services                                                     |
| Facilities                              | First-level care                                                      |
| Facilities                              | Hospital care                                                         |
| Human resources                         | Skill level required for service provision                            |
|                                         | Skill level required for staff supervision                            |
|                                         | Intensity of professional services in terms of frequency or duration  |
|                                         | Management and planning requirements                                  |
| Communication and transport             | Dependence of delivery on communication and transport infrastructure  |
| <b>Government capacity requirements</b> |                                                                       |
| Regulation/legislation                  | Need for regulation.                                                  |
| Management systems                      | Need for sophisticated management systems                             |
| Collaborative action                    | Need for inter-sectoral action within government.                     |
|                                         | Need for partnership between government and external funding agencies |
| <b>Usage characteristics</b>            |                                                                       |
| Ease of use                             | Need for information and education                                    |
| Pre-existing demand                     | Need for promotion                                                    |
| Black market risk                       | Need to prevent resale/counterfeiting                                 |



1  
2  
3 The WHO AFRO PEC package was divided into two components: eye health  
4 prevention/promotion and case management. The four dimensions of Gericke's framework  
5 were applied to each component i.e., intervention characteristics, delivery characteristics,  
6 government capacity requirements and usage characteristics.  
7  
8  
9

10 To populate the framework, a literature search on PEC in sub-Saharan Africa was conducted  
11 and all articles of primary eye care in sub-Saharan Africa up to April 2018 were searched for  
12 using MEDLINE. Search terms included "primary eye care ", with "sub Saharan Africa" and  
13 "eye disease" or "eye" with "primary healthcare" and "Africa"(10) In addition, we used all the  
14 relevant articles from the two most recent published reviews on primary eye care in SSA,  
15 (10, 18) to identify evidence-based criteria for the technical complexities required to  
16 implement each component of the WHO AFRO PEC package (Figure 1B).  
17  
18  
19

20  
21  
22 Further implementation characteristics were identified by two of the authors (CG and AA)  
23 who have more than 40 years' combined experience of eye care in sub-Saharan Africa. This  
24 yielded a list of key criteria for the technical complexity of PEC. A four-point Likert scale  
25 (where 1=strongly agree and 4= strongly disagree), was applied to each of the statements  
26 and this formed the Delphi questionnaires. The Delphi questionnaires were reviewed by an  
27 expert in international eye health, (CG) a health interventions expert (HB) and a statistician  
28 (DM). They were then sent to a panel of experts in PEC in sub-Saharan Africa.  
29  
30  
31  
32  
33

### 34 **Step 2. Selection of experts for the Delphi exercise**

35  
36 The aim was to recruit a panel of eye care professionals who were experts in eye care in sub-  
37 Saharan Africa, with expertise to validate the relevance of the selected technical complexities  
38 and capacities required to implement the WHO AFRO PEC Package. Eligibility criteria  
39 included an eye care professional with a minimum of 10 years' experience of community eye  
40 care in sub Saharan Africa, still professionally active, and with experience of eye health policy.  
41 They were selected by a modified exponential snowball sampling method where an initial  
42 participant provides multiple referrals.(19) Each new referral was vetted and included in the  
43 study if the eligibility criteria were met.  
44  
45  
46  
47  
48  
49

### 50 **Step 3. Delphi Round 1**

51  
52 Members of the team were contacted by email and telephone and their availability was  
53 confirmed. Informed consent was obtained. Members were sent the following documents:  
54 the methods to be used during the Delphi exercise, an explanation of Gericke's framework of  
55 technical complexity, a draft of the technical complexities required to deliver both  
56 components of the WHO AFRO PEC package in the form of the first Delphi questionnaires.  
57  
58  
59 Participants were invited to state their level of agreement to each statement in the  
60

1  
2  
3 questionnaire by ticking the appropriate level in the Likert scale in a Microsoft Excel®  
4 spreadsheet. A comments box was included beside each statement for comments or  
5 suggestions.  
6  
7

#### 8 9 **Step 4. Analysis of Delphi Round 1**

10  
11 Once all the questionnaires had been received, they were analysed for consensus. Analyses  
12 were performed using STATA V, 15.1 (Statcorp, Texas) to generate descriptive statistics. No  
13 universally accepted criteria for consensus have been defined for Delphi studies.(20)

14 However, it has been shown that consensus can be said to have been achieved if a certain  
15 proportion of the votes fall within a predefined range.(21) Consensus for this study was  
16 defined as at least 70% agreement on each statement in the upper 50<sup>th</sup> percentile (Likert  
17 scores 1 and 2). Where consensus was reached, the statements were adopted. Statements  
18 where consensus was not reached were modified based on the suggestions/comments and  
19 incorporated into the second round, as were newly identified statements.  
20  
21  
22  
23  
24  
25

#### 26 27 **Step 5. Modification for technical capacity**

28 Statements included from the first round were modified so that panel members could  
29 indicate their agreement on the technical capacities which need to be available to deliver the  
30 WHO PEC package.  
31  
32  
33

#### 34 35 **Step 6. Delphi Round 2**

36 For this round, the participants received the questionnaires with the comments/suggestions  
37 of other panel members from the first round. However, this was modified for technical  
38 capacity as stated above and sent to the same expert panel using the same Likert scale and  
39 level of consensus.  
40  
41  
42  
43

#### 44 45 **Step 7. Analysis of Delphi Round 2**

46 Only statements that achieved at least 70% consensus in the upper 50<sup>th</sup> percentile (Likert  
47 scores 1 and 2) in the second round were included in the final document. Where consensus  
48 was reached, the statements were adopted and formed the basis of the final document. Any  
49 minority views (<70% consensus) did not form part of the adopted technical capacities but  
50 were documented. The technical capacities needed were mapped unto the WHO health  
51 system's building blocks.(22)  
52  
53

54 Patients were not involved in this study.  
55  
56  
57  
58  
59  
60

## RESULTS

### Composition of Delphi panel of experts

A total of 12 experts were contacted, nine of whom agreed to participate (Table 2). No response was received from the other three invitees despite at least three contacts by email. All nine completed the two rounds of the Delphi survey.

**Table 2: Characteristics of the Delphi Panel n=9**

| Characteristics                    |                       | *N (%)   |
|------------------------------------|-----------------------|----------|
| Gender                             | Female                | 5 (55.6) |
| Age                                | <50 years             | 2 (22.2) |
|                                    | >50 years             | 7 (77.8) |
| Professional group                 | Ophthalmologist       | 7 (77.8) |
|                                    | Administrator         | 2 (22.2) |
| Primary function                   | Clinician             | 3 (33.3) |
|                                    | Researcher            | 3 (33.3) |
|                                    | NGO Administrator     | 3 (33.3) |
| Type of institution                | Academic Hospital     | 2 (22.2) |
|                                    | Non-academic Hospital | 1(11,1)  |
|                                    | Research Institute    | 3 (33.3) |
|                                    | Eyecare NGO           | 3 (33.3) |
| Region of practice                 | West Africa           | 5 (56)   |
|                                    | East Africa           | 2 (22)   |
|                                    | South Africa          | 2 (22)   |
|                                    | Central Africa        | 1 (11)   |
|                                    | Europe                | 1 (11)   |
| Involved in national policy making | Yes                   | 9 (100)  |

\*some participants had multiple roles/had worked in multiple regions.

The mean number of years of experience in eye health of the participants was 31.1±8.9 years while the range was 18-43 years.

### Delphi questionnaire development

A total of 81 statements on the technical complexity of the WHO AFROPEC package were developed from Gericke's framework, 38 for health promotion and 43 for facility-based case management (Table 3).

**Table 3 Statements for each component of the WHO AFRO Primary Eye Care Package**

| Gericke's Framework Domains      |                             | Component of WHO AFRO PEC Package |                          |
|----------------------------------|-----------------------------|-----------------------------------|--------------------------|
|                                  |                             | Health promotion and prevention   | Facility case management |
|                                  |                             | <b>Number of statements</b>       |                          |
| Intervention characteristics     | Basic product design        | 7                                 | 10                       |
|                                  | Supplies                    | 2                                 | 1                        |
|                                  | Equipment                   | 3                                 | 5                        |
| Delivery characteristics         | Type of facility needed     | 3                                 | 4                        |
|                                  | Human resource requirement  | 8                                 | 9                        |
|                                  | Communication and transport | 3                                 | 2                        |
| Government capacity requirements | Regulation/legislation      | 2                                 | 4                        |
|                                  | Management systems          | 2                                 | 1                        |
|                                  | Collaborative action        | 4                                 | 3                        |
| Usage characteristics            | Ease of use                 | 2                                 | 2                        |
|                                  | Pre-existing demand         | 1                                 | 1                        |
|                                  | Black Market Risk           | 1                                 | 1                        |
| <b>Total</b>                     |                             | <b>38</b>                         | <b>43</b>                |

In the first round, there was consensus in 84% of the statements with over 40% of the statements achieving 100% consensus. (See *Supplementary material: Appendix 1.*) Based on comments from Delphi round 1, six modifications were made in the health promotion component and seven in the facility case management component. (See *Supplementary material: Appendix 2.*) The modified questionnaire formed the basis of technical capacity questionnaire for round two.

In the second round, four statements were deemed to be inapplicable by 89% of participants and were removed. Consensus was achieved in 94% of the statements, with 62% achieving 100% consensus. (*Supplementary material: Appendix 3.*) Results of the 34 statements on technical capacity for health promotion for which consensus was reached are shown in Table 4A with their respective Likert ratings, quartile and 50<sup>th</sup> percentile values. Results of the 40 statements on technical capacity for facility case management for which consensus was reached are shown in Table 4B with their respective Likert ratings, quartile and 50<sup>th</sup> percentile values. The top quartile shows the number and proportion of participants that strongly agreed to each of the statements, while the 50<sup>th</sup> percentile shows the number and proportion of participants that strongly agreed or agreed. The technical capacities needed were mapped unto the WHO health system's building blocks. (Tables 5A and 5B)

**Table 4A: Consensus statements (34) on technical capacity for health promotion, with analysis of Likert scales.**

| Category / criteria                                                                                                                     | Technical capacity needed (elements that need to be available)                                                                          | Top quartile |       | 50th Percentile |      | Median  |
|-----------------------------------------------------------------------------------------------------------------------------------------|-----------------------------------------------------------------------------------------------------------------------------------------|--------------|-------|-----------------|------|---------|
|                                                                                                                                         |                                                                                                                                         | Likert 1     |       | Likert 2        |      | (IQR)   |
|                                                                                                                                         |                                                                                                                                         | N            | %     | N               | %    |         |
| <b>1. Intervention characteristics</b>                                                                                                  |                                                                                                                                         |              |       |                 |      |         |
| <u>Basic product design</u>                                                                                                             |                                                                                                                                         |              |       |                 |      |         |
| Stability: usable lifetime and risk of destruction                                                                                      | Posters that promote eye health                                                                                                         | 7            | 77.8  | 9               | 100  | 1 (1-1) |
|                                                                                                                                         | Durable posters are available                                                                                                           | 4            | 44.4  | 9               | 100  | 1 (1-2) |
| Standardizability: the degree to which an intervention can be standardized                                                              | Standardized posters available to deliver the same message per target group                                                             | 5            | 55.6  | 9               | 100  | 1 (1-2) |
|                                                                                                                                         | Posters available in the language of the community                                                                                      | 6            | 66.7  | 7               | 77.8 | 1 (1-2) |
|                                                                                                                                         | Posters with self-explanatory graphics available for the non-literate                                                                   | 8            | 88.9  | 9               | 100  | 1 (1-1) |
|                                                                                                                                         | Different types of posters available for different target groups which are appropriately displayed                                      | 5            | 55.6  | 8               | 88.9 | 1 (1-2) |
| Number of different types of equipment needed. Maintenance needed.                                                                      | Health promotion materials available that are easy to maintain                                                                          | 5            | 55.6  | 9               | 100  | 1 (1-2) |
|                                                                                                                                         | A system for the easy procurement of health promotion materials                                                                         | 6            | 66.7  | 9               | 100  | 1 (1-2) |
| <b>2. Delivery characteristics</b>                                                                                                      |                                                                                                                                         |              |       |                 |      |         |
| <u>Facilities</u>                                                                                                                       |                                                                                                                                         |              |       |                 |      |         |
| Retail sector, outreach services, first-level care, hospital care                                                                       | Health promotion in the community that includes young children and their carers, diabetics and the elderly as their target audience     | 4            | 44.4  | 9               | 100  | 1 (1-2) |
|                                                                                                                                         | Time, space and willingness to deliver opportunistic eye health promotion to groups in the facility                                     | 7            | 77.8  | 8               | 88.9 | 1 (1-1) |
|                                                                                                                                         | Time and the willingness to deliver opportunistic eye health promotion to targeted individuals in the facility e.g. diabetics           | 5            | 55.6  | 7               | 77.8 | 1(1-2)  |
| <u>Human resources</u>                                                                                                                  |                                                                                                                                         |              |       |                 |      |         |
| Skill level required for service provision                                                                                              | Staff skilled in communicating with community members                                                                                   | 7            | 77.8  | 9               | 100  | 1 (1-1) |
|                                                                                                                                         | Staff who are knowledgeable about community, eye diseases and where to access care                                                      | 7            | 77.8  | 9               | 100  | 1 (1-1) |
|                                                                                                                                         | Village health workers resident in the community who are able to deliver health promotion                                               | 6            | 66.7  | 9               | 100  | 1 (1-2) |
|                                                                                                                                         | Facility based staff who are able to deliver health promotion                                                                           | 5            | 55.6  | 9               | 100  | 1 (1-2) |
|                                                                                                                                         | Professionals to train staff on eye health promotion and develop health promotion materials                                             | 9            | 100.0 | 9               | 100  | 1 (1-1) |
| Skill level required for staff supervision. Degree of supervision required                                                              | Supervisors who are able to supervise health promotion activities including eye health                                                  | 7            | 77.8  | 9               | 100  | 1 (1-1) |
| Intensity of professional services in terms of frequency or duration e.g. on schedule/periodic or continuous to accommodate emergencies | Staff who regularly deliver health promotion on schedule                                                                                | 7            | 77.8  | 9               | 100  | 1 (1-1) |
| Need for managerial staff: management and planning requirements                                                                         | Existing managerial staff who plan and organise target audience to be sensitised in appropriate locations e.g. carers of young children | 5            | 55.6  | 9               | 100  | 1 (1-2) |
| <u>Communication and transport</u>                                                                                                      |                                                                                                                                         |              |       |                 |      |         |

| Category / criteria | Technical capacity needed (elements that need to be available)                                                | Top quartile |          | 50th Percentile |          | Median  |
|---------------------|---------------------------------------------------------------------------------------------------------------|--------------|----------|-----------------|----------|---------|
|                     |                                                                                                               | Likert 1     | Likert 2 | Likert 1        | Likert 2 | (IQR)   |
|                     |                                                                                                               | N            | %        | N               | %        |         |
| 1                   |                                                                                                               |              |          |                 |          |         |
| 2                   |                                                                                                               |              |          |                 |          |         |
| 3                   |                                                                                                               |              |          |                 |          |         |
| 4                   | Dependence of delivery on communication and transport infrastructure: telephones, roads                       | 6            | 66.7     | 7               | 77.8     | 1 (1-2) |
| 5                   |                                                                                                               |              |          |                 |          |         |
| 6                   |                                                                                                               |              |          |                 |          |         |
| 7                   | Need for substantial exchange of information between different sectors or levels of care                      | 8            | 88.9     | 9               | 100      | 1 (1-1) |
| 8                   |                                                                                                               |              |          |                 |          |         |
| 9                   | Staff who are able to communicate in the local language                                                       | 9            | 100      | 9               | 100      | 1 (1-1) |
| 10                  |                                                                                                               |              |          |                 |          |         |
| 11                  | <b>3. Government capacity requirements</b>                                                                    |              |          |                 |          |         |
| 12                  | <u>Regulation/legislation</u>                                                                                 |              |          |                 |          |         |
| 13                  |                                                                                                               |              |          |                 |          |         |
| 14                  | Need for legislation/regulation, monitoring regulatory measures and enforcement of regulation                 | 5            | 55.6     | 8               | 88.9     | 1 (1-2) |
| 15                  |                                                                                                               |              |          |                 |          |         |
| 16                  | Eye health promotion activities that are recorded and monitored                                               | 4            | 44.4     | 7               | 77.8     | 1 (1-1) |
| 17                  |                                                                                                               |              |          |                 |          |         |
| 18                  |                                                                                                               |              |          |                 |          |         |
| 19                  | National blindness prevention strategy that incorporates eye health promotion                                 | 9            | 88.9     | 8               | 88.9     | 1 (1-1) |
| 20                  |                                                                                                               |              |          |                 |          |         |
| 21                  | Need for sophisticated management systems and managerial staff. Level of management and planning requirements | 4            | 44.4     | 7               | 77.8     | 2(1-2)  |
| 22                  |                                                                                                               |              |          |                 |          |         |
| 23                  |                                                                                                               |              |          |                 |          |         |
| 24                  |                                                                                                               |              |          |                 |          |         |
| 25                  | <u>Collaborative action</u>                                                                                   |              |          |                 |          |         |
| 26                  |                                                                                                               |              |          |                 |          |         |
| 27                  | Need for inter-sectoral action within government. Need for partnership between government and civil society.  | 6            | 66.7     | 9               | 100      | 1 (1-2) |
| 28                  |                                                                                                               |              |          |                 |          |         |
| 29                  | Existing school health programmes.                                                                            | 3            | 33.3     | 7               | 77.8     | 2(1-2)  |
| 30                  |                                                                                                               |              |          |                 |          |         |
| 31                  | Collaborations with NGOs to provide health promotion                                                          | 1            | 11.1     | 7               | 77.8     | 2(1-2)  |
| 32                  |                                                                                                               |              |          |                 |          |         |
| 33                  | Need for partnership between government and external funding agencies                                         | 7            | 77.8     | 9               | 100      | 1 (1-1) |
| 34                  |                                                                                                               |              |          |                 |          |         |
| 35                  | Collaboration between communities and frontline health communities                                            |              |          |                 |          |         |
| 36                  | <b>4. Usage characteristics</b>                                                                               |              |          |                 |          |         |
| 37                  |                                                                                                               |              |          |                 |          |         |
| 38                  | <u>Ease of use</u>                                                                                            |              |          |                 |          |         |
| 39                  |                                                                                                               |              |          |                 |          |         |
| 40                  | Need for information and education                                                                            | 9            | 88.9     | 9               | 100      | 1 (1-1) |
| 41                  |                                                                                                               |              |          |                 |          |         |
| 42                  | Need for supervision                                                                                          | 9            | 88.9     | 9               | 100      | 1 (1-1) |
| 43                  | <u>Pre-existing demand</u>                                                                                    |              |          |                 |          |         |
| 44                  |                                                                                                               |              |          |                 |          |         |
| 45                  | Need for promotion                                                                                            | 9            | 88.9     | 9               | 100      | 1 (1-1) |
| 46                  |                                                                                                               |              |          |                 |          |         |
| 47                  | <u>Black market risk</u>                                                                                      |              |          |                 |          |         |
| 48                  |                                                                                                               |              |          |                 |          |         |
| 49                  | Need to prevent resale/counterfeiting                                                                         | 7            | 77.8     | 9               | 100      | 1 (1-1) |
| 50                  |                                                                                                               |              |          |                 |          |         |
| 51                  |                                                                                                               |              |          |                 |          |         |
| 52                  |                                                                                                               |              |          |                 |          |         |
| 53                  |                                                                                                               |              |          |                 |          |         |
| 54                  |                                                                                                               |              |          |                 |          |         |
| 55                  |                                                                                                               |              |          |                 |          |         |
| 56                  |                                                                                                               |              |          |                 |          |         |
| 57                  |                                                                                                               |              |          |                 |          |         |
| 58                  |                                                                                                               |              |          |                 |          |         |
| 59                  |                                                                                                               |              |          |                 |          |         |
| 60                  |                                                                                                               |              |          |                 |          |         |

**Table 4B: Consensus statements (40) on technical capacity for Facility Case Management, with analysis of Likert scales**

| Category / Criteria                                 | Technical capacity needed (elements that need to be available)                                              | Top quartile |      | 50th percentile |      | Median (IQR) |
|-----------------------------------------------------|-------------------------------------------------------------------------------------------------------------|--------------|------|-----------------|------|--------------|
|                                                     |                                                                                                             | Likert 1     |      | Likert 2        |      |              |
|                                                     |                                                                                                             | N            | %    | N               | %    |              |
| <b>1. Intervention characteristics</b>              |                                                                                                             |              |      |                 |      |              |
| <u>Basic product design</u>                         |                                                                                                             |              |      |                 |      |              |
| Stability/ease of storage/ease of transport         | Torches can be solar powered and are stable                                                                 | 6            | 66.7 | 9               | 100  | 1(1-2)       |
|                                                     | Appropriate and secure storage for drugs and consumables                                                    | 8            | 88.9 | 9               | 100  | 1(1-1)       |
|                                                     | Eye drops that do not require cool storage should be stocked                                                | 5            | 55.6 | 8               | 88.9 | 1(1-2)       |
|                                                     | Tetanus toxoid, which requires cool storage                                                                 | 6            | 66.7 | 8               | 88.9 | 1(1-2)       |
|                                                     | Topical antibiotic ointment does not require cold storage                                                   | 6            | 66.7 | 8               | 88.9 | 1(1-2)       |
|                                                     | Sterile saline solution for eye irrigation is stable                                                        | 4            | 44.4 | 7               | 77.8 | 1(1-2)       |
|                                                     | High dose vitamin A is stable                                                                               | 5            | 55.6 | 9               | 100  | 2(1-2)       |
|                                                     | Injectable antibiotics, for ophthalmia neonatorum and other conditions, may require cool storage            | 4            | 44.4 | 7               | 77.8 | 1(1-2)       |
|                                                     | Pre-existing PHC transport channels should be available to transport PEC consumables.                       | 7            | 77.8 | 9               | 100  | 1(1-1)       |
| Standardizability                                   | The WHO AFRO PEC Package is standardized                                                                    | 6            | 66.7 | 9               | 100  | 1(1-2)       |
| Safety profile                                      | Staff who are trained/can be trained to deliver the intervention correctly and not cause harm               | 8            | 88.9 | 9               | 100  | 1(1-1)       |
| <u>Supplies</u>                                     |                                                                                                             |              |      |                 |      |              |
| Need for regular supplies                           | Medication supply system to support regular supply of eye medications and consumables                       | 8            | 88.9 | 9               | 100  | 1(1-1)       |
| <u>Equipment</u>                                    |                                                                                                             |              |      |                 |      |              |
| High-technology equipment and infrastructure needed | Diagnostic equipment: Snellen distance visual acuity chart; near visual acuity chart, torches and batteries | 7            | 77.8 | 9               | 100  | 1(1-1)       |
|                                                     | Adequate space to use appropriate, standardized visual acuity charts                                        | 6            | 66.7 | 8               | 88.9 | 1(1-2)       |
|                                                     | Adequate space for counselling patients                                                                     | 8            | 88.9 | 9               | 100  | 1(1-1)       |
| Number of different types of equipment needed       | One set of diagnostic equipment                                                                             | 6            | 66.7 | 8               | 88.9 | 1(1-2)       |
| Maintenance needed                                  | System to maintain equipment in the facility                                                                | 5            | 55.6 | 9               | 100  | 1(1-2)       |
| <b>2. Delivery characteristics</b>                  |                                                                                                             |              |      |                 |      |              |
| <u>Facilities</u>                                   |                                                                                                             |              |      |                 |      |              |
| First-level care                                    | Eye care services to manage uncomplicated eye conditions.                                                   | 6            | 66.7 | 9               | 100  | 1(1-2)       |
| Hospital care                                       | Referral hospital to manage complicated eye conditions.                                                     | 8            | 88.9 | 9               | 100  | 1(1-1)       |
| <u>Human resources</u>                              |                                                                                                             |              |      |                 |      |              |
|                                                     | Staff able to make a diagnosis (take a history; measuring visual acuity; basic eye examination)             | 8            | 88.9 | 9               | 100  | 1(1-1)       |
| Skill level required for service provision          | Staff able to manage some conditions e.g., eye irrigation; remove foreign bodies; give IM injections        | 8            | 88.9 | 9               | 100  | 1(1-1)       |
|                                                     | Staff able to identify which cases to refer and the level of urgency                                        | 8            | 88.9 | 9               | 100  | 1(1-1)       |

| Category / Criteria | Technical capacity needed (elements that need to be available)                                          | Top quartile    |                 | 50th percentile |                 | Median (IQR) |
|---------------------|---------------------------------------------------------------------------------------------------------|-----------------|-----------------|-----------------|-----------------|--------------|
|                     |                                                                                                         | Likert 1<br>N % | Likert 2<br>N % | Likert 2<br>N % | Likert 2<br>N % |              |
| 1                   |                                                                                                         |                 |                 |                 |                 |              |
| 2                   |                                                                                                         |                 |                 |                 |                 |              |
| 3                   |                                                                                                         |                 |                 |                 |                 |              |
| 4                   | Skill level required for staff supervision. Degree of supervision required.                             | 6               | 66.7            | 9               | 100             | 1(1-2)       |
| 5                   |                                                                                                         |                 |                 |                 |                 |              |
| 6                   |                                                                                                         |                 |                 |                 |                 |              |
| 7                   | Regular supervision of PHC activities and PEC activities                                                | 6               | 66.7            | 9               | 100             | 1(1-2)       |
| 8                   |                                                                                                         |                 |                 |                 |                 |              |
| 9                   | Frequency or duration of services: e.g. on schedule /periodic or continuous to accommodate emergencies  | 8               | 88.9            | 9               | 100             | 1(1-1)       |
| 10                  |                                                                                                         |                 |                 |                 |                 |              |
| 11                  |                                                                                                         |                 |                 |                 |                 |              |
| 12                  |                                                                                                         |                 |                 |                 |                 |              |
| 13                  | Facility managers who supply consumables and plan purchasing                                            | 6               | 66.7            | 9               | 100             | 1(1-2)       |
| 14                  |                                                                                                         |                 |                 |                 |                 |              |
| 15                  | Management and planning requirements. Need for managerial staff                                         | 5               | 55.6            | 7               | 77.8            | 1(1-2)       |
| 16                  |                                                                                                         |                 |                 |                 |                 |              |
| 17                  |                                                                                                         |                 |                 |                 |                 |              |
| 18                  | Managerial systems to coordinate staff rotations to ensure daily facility coverage by trained PEC staff | 7               | 77.8            | 9               | 100             | 1(1-1)       |
| 19                  |                                                                                                         |                 |                 |                 |                 |              |
| 20                  | <u>Communication and Transport</u>                                                                      |                 |                 |                 |                 |              |
| 21                  |                                                                                                         |                 |                 |                 |                 |              |
| 22                  | Depends on delivery of communication and transport infrastructure                                       | 6               | 66.7            | 9               | 100             | 1(1-2)       |
| 23                  |                                                                                                         |                 |                 |                 |                 |              |
| 24                  | Transportation between the PH facility and referral centre                                              | 3               | 33.3            | 7               | 77.8            | 1(1-2)       |
| 25                  |                                                                                                         |                 |                 |                 |                 |              |
| 26                  | <b>3. Government capacity requirements</b>                                                              |                 |                 |                 |                 |              |
| 27                  | <u>Regulation/legislation</u>                                                                           |                 |                 |                 |                 |              |
| 28                  |                                                                                                         |                 |                 |                 |                 |              |
| 29                  | Need for regulation                                                                                     | 6               | 66.7            | 8               | 88.9            | 1(1-1)       |
| 30                  |                                                                                                         |                 |                 |                 |                 |              |
| 31                  | Regulatory measures need to be enforced and regulated                                                   | 7               | 77.8            | 9               | 100             | 1(1-1)       |
| 32                  |                                                                                                         |                 |                 |                 |                 |              |
| 33                  |                                                                                                         |                 |                 |                 |                 |              |
| 34                  | Reporting systems for measles outbreaks                                                                 | 9               | 100.0           | 9               | 100             | 1(1-1)       |
| 35                  |                                                                                                         |                 |                 |                 |                 |              |
| 36                  | Reporting system for ophthalmia neonatorum                                                              | 7               | 77.8            | 9               | 100             | 1(1-1)       |
| 37                  | <u>Management systems</u>                                                                               |                 |                 |                 |                 |              |
| 38                  | Sophisticated management systems required                                                               | 7               | 77.8            | 9               | 100             | 1(1-1)       |
| 39                  |                                                                                                         |                 |                 |                 |                 |              |
| 40                  |                                                                                                         |                 |                 |                 |                 |              |
| 41                  | <u>Collaborative action</u>                                                                             |                 |                 |                 |                 |              |
| 42                  | Inter-sectoral action needed within government, and partnership between government and civil society    | 6               | 66.7            | 9               | 100             | 1(1-2)       |
| 43                  |                                                                                                         |                 |                 |                 |                 |              |
| 44                  |                                                                                                         |                 |                 |                 |                 |              |
| 45                  |                                                                                                         |                 |                 |                 |                 |              |
| 46                  | <b>4. Usage Characteristics</b>                                                                         |                 |                 |                 |                 |              |
| 47                  | <u>Need for supervision</u>                                                                             |                 |                 |                 |                 |              |
| 48                  | Staff who make supervisory home visits                                                                  | 5               | 55.6            | 7               | 77.8            | 1(1-2)       |
| 49                  |                                                                                                         |                 |                 |                 |                 |              |
| 50                  | Staff who supervise referrals to ensure compliance                                                      | 4               | 44.4            | 8               | 88.9            | 1(1-2)       |
| 51                  |                                                                                                         |                 |                 |                 |                 |              |
| 52                  | <u>Pre-existing demand</u>                                                                              |                 |                 |                 |                 |              |
| 53                  | Need for promotion                                                                                      | 4               | 44.4            | 8               | 88.9            | 1(1-2)       |
| 54                  |                                                                                                         |                 |                 |                 |                 |              |
| 55                  | <u>Black market risk</u>                                                                                |                 |                 |                 |                 |              |
| 56                  |                                                                                                         |                 |                 |                 |                 |              |
| 57                  |                                                                                                         |                 |                 |                 |                 |              |
| 58                  |                                                                                                         |                 |                 |                 |                 |              |
| 59                  |                                                                                                         |                 |                 |                 |                 |              |
| 60                  |                                                                                                         |                 |                 |                 |                 |              |
| 54                  | Need to prevent resale/counterfeiting                                                                   | 6               | 66.7            | 8               | 88.9            | 1(1-2)       |
| 55                  |                                                                                                         |                 |                 |                 |                 |              |
| 56                  |                                                                                                         |                 |                 |                 |                 |              |
| 57                  |                                                                                                         |                 |                 |                 |                 |              |
| 58                  |                                                                                                         |                 |                 |                 |                 |              |
| 59                  |                                                                                                         |                 |                 |                 |                 |              |
| 60                  |                                                                                                         |                 |                 |                 |                 |              |



**Tables 5A and B: Gericke's framework; technical capacities needed to deliver (A) health promotion, and (B) facility-based case management.****A. Health promotion**

| Category                                                  | Criteria                                                                                                                                 | Technical Capacity: Elements that need to be available                                                                                            | Health system building block   |
|-----------------------------------------------------------|------------------------------------------------------------------------------------------------------------------------------------------|---------------------------------------------------------------------------------------------------------------------------------------------------|--------------------------------|
| <b>Intervention characteristics</b>                       |                                                                                                                                          |                                                                                                                                                   |                                |
| <u>Basic product design</u>                               | <i>Stability</i>                                                                                                                         | Posters that promote eye health should be available. Posters should be durable.                                                                   | Infrastructure, technology etc |
|                                                           | <i>Standardizability</i>                                                                                                                 | Standardized posters, delivering the same message per target group.                                                                               |                                |
|                                                           |                                                                                                                                          | Posters that are in the language of the community.                                                                                                |                                |
|                                                           |                                                                                                                                          | Posters with self-explanatory graphics should be available for the illiterate.                                                                    |                                |
| <u>Supplies and equipment</u>                             | <i>Ease of acquisition</i>                                                                                                               | Easy system to procure health promotion materials.                                                                                                | Infrastructure, technology etc |
|                                                           | <i>Number of different types of equipment needed</i>                                                                                     | Different types of posters available for different target groups which are appropriately displayed.                                               |                                |
|                                                           | <i>Maintenance needed</i>                                                                                                                | Health promotion materials available that are easy to maintain.                                                                                   |                                |
| <b>Delivery characteristics</b>                           |                                                                                                                                          |                                                                                                                                                   |                                |
| <u>Facilities</u>                                         | <i>Outreach services</i>                                                                                                                 | Health promotion that includes young children and their carers, diabetics and the elderly as the target audience in the community.                | Service delivery               |
|                                                           | <i>First-level care</i>                                                                                                                  | Time and space available, and staff willing to deliver opportunistic eye health promotion to specific groups in the facility                      |                                |
|                                                           | <i>First-level care</i>                                                                                                                  | Time and space available, and staff willing to deliver opportunistic eye health promotion to specific individuals in the facility e.g. diabetics. |                                |
| <u>Human resources</u>                                    | <i>Skill level required for service provision</i>                                                                                        | Staff skilled in communicating with community members                                                                                             | Health workforce               |
|                                                           |                                                                                                                                          | Staff who are knowledgeable about community, eye diseases and where to access care                                                                |                                |
|                                                           | <i>Intensity of professional services in terms of frequency or duration</i>                                                              | Village health workers resident in the community who are able to regularly deliver health promotion.                                              |                                |
|                                                           |                                                                                                                                          | Facility-based staff who are able to regularly deliver health promotion.                                                                          |                                |
|                                                           |                                                                                                                                          | Professionals to train staff on eye health promotion and develop health promotion materials.                                                      |                                |
|                                                           | <i>Skill level required for staff supervision</i>                                                                                        | Supervisors who are able to supervise health promotion activities including eye health.                                                           |                                |
| Staff who regularly deliver health promotion on schedule. |                                                                                                                                          |                                                                                                                                                   |                                |
| <i>Management and planning requirements</i>               | Existing managerial staff who plan and organise target audience to be sensitised in appropriate locations e.g. carers of young children. |                                                                                                                                                   |                                |

|                                                                   |                                                                              |                                                                                                                                                              |                                |
|-------------------------------------------------------------------|------------------------------------------------------------------------------|--------------------------------------------------------------------------------------------------------------------------------------------------------------|--------------------------------|
| <u>Communication and transport</u>                                | <i>Dependence of delivery on communication and transport infrastructure</i>  | Local transport infrastructure to visit communities.                                                                                                         | Infrastructure, technology etc |
|                                                                   |                                                                              | Appropriate communication channels between the community and PHC facilities.                                                                                 | Service delivery/HMIS          |
|                                                                   |                                                                              | Staff who are able to communicate in the local language.                                                                                                     | Health workforce               |
| <b>Government capacity requirements</b>                           |                                                                              |                                                                                                                                                              |                                |
| <u>Regulation/legislation</u>                                     | <i>Need for regulation/legislation.</i>                                      | Health promotion materials which have been approved and endorsed by local regulatory authorities.                                                            | Governance and leadership      |
|                                                                   |                                                                              | A national blindness prevention strategy that incorporates eye health promotion.                                                                             |                                |
| <u>Management systems</u>                                         | <i>Need for management systems</i>                                           | Existing managerial structures for health promotion can be used. Eye health promotion activities that are recorded and monitored.                            | HMIS                           |
| <u>Collaborative action</u>                                       | <i>Need for inter-sectoral action within government.</i>                     | Intersectoral activities within government or partnerships between government and civil society.                                                             | Governance and leadership      |
|                                                                   |                                                                              | Existing school health programmes.                                                                                                                           | Service delivery               |
|                                                                   | <i>Need for partnership between government and external funding agencies</i> | Collaborations with NGOs to provide health promotion                                                                                                         | Governance and leadership      |
| Collaboration between communities and PHC facilities is required. |                                                                              |                                                                                                                                                              |                                |
| <b>Usage characteristics</b>                                      |                                                                              |                                                                                                                                                              |                                |
| <u>Ease of use</u>                                                | <i>Need for information and education/need for supervision</i>               | Communication channels with community that are available to inform target population                                                                         | Service delivery               |
|                                                                   |                                                                              | Staff who are available to supervise health promotion activities                                                                                             | Governance and leadership      |
| <u>Pre-existing demand</u>                                        | <i>Need for promotion</i>                                                    | Staff who are able to engage in eye health promotion to target audience to significantly increase demand.                                                    | Service delivery               |
| <u>Black market risk</u>                                          | <i>Need to prevent resale/counterfeiting</i>                                 | Staff who are able and willing to engage with traditional healers and train them to identify and refer eye conditions. A system that supports this training. |                                |

Table B Facility-based case management

| Category                            | Criteria                                                                                                      | Technical Capacity: Elements that need to be available                                                                       | Health system building block   |
|-------------------------------------|---------------------------------------------------------------------------------------------------------------|------------------------------------------------------------------------------------------------------------------------------|--------------------------------|
| <b>Intervention characteristics</b> |                                                                                                               |                                                                                                                              |                                |
| <u>Basic product design</u>         | <i>Stability and ease of storage</i>                                                                          | Torches should be available. They can be solar powered and are stable.                                                       | Infrastructure, technology etc |
|                                     |                                                                                                               | Appropriate and secure storage for drugs and consumables should be available                                                 |                                |
|                                     |                                                                                                               | Eye drops that do not require cool storage should be stocked                                                                 |                                |
|                                     |                                                                                                               | Tetanus toxoid will require cool storage and should be available from facility childhood immunisation activities             |                                |
|                                     |                                                                                                               | Topical antibiotic ointment does not require cold storage and should be available.                                           |                                |
|                                     |                                                                                                               | Injectable antibiotics for ophthalmia neonatorum may require cool storage but should be available to treat other conditions. |                                |
|                                     |                                                                                                               | Sterile saline solution for eye irrigation is stable and should be available                                                 |                                |
|                                     |                                                                                                               | High dose vitamin A is stable and should be available from Maternal and Child health activities.                             |                                |
| <i>Ease of transport</i>            | Pre-existing PHC transport channels should be available to transport PEC consumables.                         | Health workforce                                                                                                             |                                |
| <i>Standardizability</i>            | The WHO AFRO PEC Package is standardized and can be available in all Primary Care facilities                  |                                                                                                                              |                                |
| <i>Safety profile</i>               | Available staff who are trained/can be trained to deliver the intervention correctly so as not to cause harm. |                                                                                                                              |                                |
| <u>Supplies and equipment</u>       | <i>Need for regular supplies</i>                                                                              | A medication supply system that can support the regular supply of eye medications and consumables                            | Infrastructure, technology etc |
|                                     | <i>High-technology equipment and infrastructure needed</i>                                                    | Diagnostic equipment is available: Snellen distance visual acuity chart; near visual acuity chart, torches and batteries.    |                                |
|                                     |                                                                                                               | Adequate space to support the use of appropriate and standardized visual acuity charts.                                      |                                |
|                                     |                                                                                                               | Adequate space for counselling patients should be available.                                                                 |                                |
|                                     | <i>Number of different types of equipment needed</i>                                                          | The availability of one set of diagnostic equipment                                                                          |                                |
| <i>Maintenance needed</i>           | An available system for the maintenance of facility equipment.                                                |                                                                                                                              |                                |

| <b>Delivery characteristics</b>             |                                                                                                                                                                |                                                                                                                                                |                                |                           |
|---------------------------------------------|----------------------------------------------------------------------------------------------------------------------------------------------------------------|------------------------------------------------------------------------------------------------------------------------------------------------|--------------------------------|---------------------------|
| <u>Facilities</u>                           | <i>First-level care</i>                                                                                                                                        | The availability of eye care services to manage uncomplicated eye conditions.                                                                  | Service delivery               |                           |
| <u>Facilities</u>                           | <i>Hospital care</i>                                                                                                                                           | The availability of a referral hospital to manage complicated eye conditions.                                                                  |                                |                           |
| <u>Human resources</u>                      | <i>Skill level required for service provision</i>                                                                                                              | Staff who are able to make a diagnosis (eliciting a history; measuring visual acuity; basic eye examination)                                   |                                |                           |
|                                             |                                                                                                                                                                | Staff who are able to manage some conditions e.g., eye irrigation; removal of foreign bodies; give IM injections (tetanus toxoid; antibiotics) |                                |                           |
|                                             |                                                                                                                                                                | Staff who are able to identify which cases to refer and the level of urgency                                                                   |                                |                           |
|                                             | <i>Skill level required for staff supervision</i>                                                                                                              | PHC supervisors who are knowledgeable about eye conditions and their management.                                                               |                                | Governance and leadership |
|                                             |                                                                                                                                                                | Supervisors who regularly supervise PHC activities and can supervise PEC activities                                                            |                                |                           |
|                                             | <i>Intensity of professional services in terms of frequency or duration</i>                                                                                    | Staff trained in PEC who are available continuously to manage eye conditions, especially emergencies.                                          | Service delivery               |                           |
| <i>Management and planning requirements</i> | Existing managerial facility staff who are able to manage the supply of consumables and plan purchasing.                                                       | Governance and leadership                                                                                                                      |                                |                           |
|                                             | Existing managerial facility staff who are able to establish and maintain referral and feedback mechanisms between the PHC facility and eye department/clinic. |                                                                                                                                                |                                |                           |
|                                             | Existing managerial systems to coordinate staff rotations to ensure daily facility coverage by trained PEC staff.                                              |                                                                                                                                                |                                |                           |
| <u>Communication and transport</u>          | <i>Dependence of delivery on communication and transport infrastructure</i>                                                                                    | Communication channels to maintain referral and feedback mechanisms between the PHC facility and the referral centre.                          | Infrastructure, technology etc |                           |
|                                             |                                                                                                                                                                | Transport between the PHC facility and the referral centre.                                                                                    |                                |                           |
| <b>Government capacity requirements</b>     |                                                                                                                                                                |                                                                                                                                                |                                |                           |
| <u>Regulation/legislation</u>               | <i>Need for regulation.</i>                                                                                                                                    | Appropriate medication and equipment need to be on the national essential drug list to facilitate availability.                                | Governance and leadership      |                           |
| <u>Management systems</u>                   | <i>Need for sophisticated management systems</i>                                                                                                               | A system that regulates drug prescription and dispensing by appropriate staff.                                                                 |                                |                           |
|                                             |                                                                                                                                                                | Communication channels to report measles outbreaks to relevant authorities.                                                                    |                                |                           |
|                                             |                                                                                                                                                                | Communication channels to report cases of ophthalmia neonatorum to relevant authorities                                                        |                                |                           |
|                                             |                                                                                                                                                                | Existing managerial structures for PHC that can be used to manage PEC.                                                                         | HMIS                           |                           |

|                              |                                                                                                                          |                                                                                                                                                              |                           |
|------------------------------|--------------------------------------------------------------------------------------------------------------------------|--------------------------------------------------------------------------------------------------------------------------------------------------------------|---------------------------|
| <u>Collaborative action</u>  | <i>Need for inter-sectoral action within government or partnership between government and external funding agencies.</i> | Availability of inter-sectoral action within government or partnerships between government and civil society.                                                | Governance and leadership |
| <b>Usage characteristics</b> |                                                                                                                          |                                                                                                                                                              |                           |
| <u>Ease of use</u>           | <i>Need for information and education/need for supervision</i>                                                           | Staff who are available to make supervisory home visits.<br>Staff who are able to supervise referrals to secondary centres to ensure compliance.             | Governance and leadership |
| <u>Pre-existing demand</u>   | <i>Need for promotion</i>                                                                                                | Staff who are able to engage in eye health promotion to target audience.                                                                                     |                           |
| <u>Black market risk</u>     | <i>Need to prevent resale/counterfeiting</i>                                                                             | Staff who are able and willing to engage with traditional healers and train them to identify and refer eye conditions. A system that supports this training. | Service delivery          |

## DISCUSSION

Despite global and regional interest in PEC,(7, 9, 23, 24) insights into the technical complexity of PEC and the technical capacities required to deliver it within PHC in SSA are lacking. To the best of our knowledge, this is the first Delphi exercise to explore the technical capacities needed to implement the WHO AFRO PEC package in sub-Saharan Africa. Our study complements a recent systematic review on health systems preparedness for integration of services at the PHC level,(25) and any tools developed from our study will enable identification of elements of the health system at primary level which need to be strengthened to deliver PEC. Having said this, it is important to recognise that eye health needs to be integrated into all levels of the health system to achieve universal coverage for eye health.(9, 26)

Gericke's framework was selected after a rigorous review of the literature on technical feasibility frameworks; it is a technical complexity framework that complements the notion of institutional capacity in determining the feasibility of implementing or scaling up an intervention.(14) Data to populate the frameworks were largely derived from a detailed review of the literature of PEC in SSA.

Consensus for these capacities were reached after a two-round Delphi exercise by experts in public health for eye care in sub-Saharan Africa; researchers, clinicians, policy makers and administrators. The primary function of panel members was evenly distributed between these three categories, and as all had been involved in policy development and service delivery for eye care, they were experienced in what was feasible and what was not. The literature review and the high consensus from the panel of experts increase the validity of the findings.

In the first round over four-fifths of the statements reached the predefined consensus, which implies that the majority of the technical complexities aligned with the views of the expert panel and their familiarity with the literature.

In the second round, there was consensus on almost all the statements, with 100% consensus for almost two thirds. This is to be expected, as the technical capacities were derived from the technical complexities. For example, one of the technical complexities was "hospital services are needed for referrals, severe cases, treatment failures, further investigations and management, as required" and the technical capacity derived was "the availability of a referral hospital to manage complicated eye conditions".

The agreed human resource elements of the delivery characteristics domain for health promotion and facility-based management had perfect consensus. Human resources for health (HRH) has been identified as a key component for the successful implementation of health interventions(27) and this has been emphasised by two review articles on PEC in

1  
2  
3 SSA.(10, 18) Government support and strong partnerships are crucial for the success of  
4 PEC in terms of sustainability and scaling up, as advocated in the WHO Global Action Plan  
5 (2014-2019) and for regulatory activities.(9) Hence the majority of elements in this domain  
6 had near perfect consensus. All the elements in the usage characteristics domain for health  
7 promotion had perfect consensus in the final round, emphasizing the importance of creating  
8 demand (28) and reducing the impact of harmful traditional eye practices. (29)  
9  
10

11  
12  
13 The WHO Health systems building blocks were mapped unto appropriate elements of the  
14 final technical capacity profile for PEC. Adopting a health systems strengthening approach in  
15 which eye health is included in all the building blocks will amplify the benefits of the  
16 intervention(30) and encourage sustainability.  
17  
18

19  
20 The technical capacity frameworks for delivering the WHO AFRO PEC package are likely to  
21 be generalizable to other SSA contexts, as they were developed using data and experts  
22 from a range of SSA countries. Local adaptation may be required to reflect the eye health  
23 needs of the population, such as the cadres providing PHC and the availability of informal  
24 health providers, for example. Furthermore, these capacity frameworks can be used as a  
25 template to develop, monitor and evaluate capacity development for PEC.  
26  
27

28  
29 There are several strengths and limitations of this study. The selection of the expert panel is  
30 a crucial part of the Delphi process as the output is based on their expert opinion.(31) Our  
31 expert panel was a non-random sample, and this may have led to hidden biases as the  
32 participants may not be representative of all the experts with the pre-determined inclusion  
33 criteria. Indeed, almost half of the participants were from the west Africa, but the majority  
34 had worked in agencies that had oversight of sub-Saharan African eye health care. Another  
35 limitation is that although all panel members had relevant expertise and experience, primary  
36 health care practitioners were not included, as the focus was on eye care which the majority  
37 of primary health care practitioners in Africa would have little experience of.  
38  
39

40  
41 One of the disadvantages of the Delphi consensus is that it provides low level evidence  
42 (expert opinion) (32) as randomised controlled trials provide the highest level evidence; only  
43 a few trials have been undertaken on PEC in low and middle income countries.(33)  
44  
45

46  
47 However, the Delphi method is useful when there are limited data to guide clinical practice.  
48 In this study, the framework for the questionnaires was a validated framework which has  
49 been used to assess the non-financial inputs needed to implement new interventions with a  
50 view to scaling up.(14) Our study used anonymity, which is an inherent strength of the Delphi  
51 process, which helped avoid undue influence by any members and the efficient harnessing  
52 of expert opinion from diversely geographically dispersed experts(34) (35) from East, West,  
53 Southern Africa and the United Kingdom. Another strength of our study is the low non-  
54  
55  
56  
57  
58  
59  
60

1  
2  
3 response bias. Although 12 experts were invited to participate, nine agreed and all  
4 completed both Delphi rounds.  
5  
6  
7

8 This study has generated the first technical feasibility capacity profile for primary eye care to  
9 guide countries wishing to implement primary eye care, based on an internationally accepted  
10 feasibility framework, a review of the PEC literature and expert opinion. However, there was  
11 limited published evidence on PEC in SSA, from which the technical capacities were  
12 derived. As more high-level evidence studies on PEC in SSA are conducted, the document  
13 will need to be revised.  
14  
15  
16  
17

### 18 19 **Future research**

20 Mixed-methods data collection tools for different participant groups (village health workers,  
21 PHC workers, heads of facilities, district supervisors) in Nigeria have been developed based  
22 on our capacities' frameworks i.e., structured questionnaires, observational check lists and  
23 topic guides for in-depth interviews. A number of PHC facilities in Southeast Nigeria have  
24 been assessed using these tools and a gap analysis will be conducted. The capacity of PHC  
25 to deliver eye care has sparked passionate debates(26) and robust studies on the  
26 effectiveness of PEC will be needed in the future.  
27  
28  
29  
30  
31  
32

### 33 **CONCLUSIONS**

34 Consensus was reached on the technical capacities which need to be in place to deliver the  
35 WHO AFRO PEC package using a Delphi exercise. Based on this document, study tools  
36 have been developed to assess health system gaps in primary health care in Nigeria.  
37 Countries or health units wishing to implement PEC using the WHO AFRO PEC package  
38 should address any capacity gaps before implementing or scaling up this intervention.  
39  
40  
41  
42  
43

### 44 **Abbreviations**

|    |      |                                       |
|----|------|---------------------------------------|
| 45 | HMIS | Health management information systems |
| 46 |      |                                       |
| 47 | IM   | intramuscular                         |
| 48 |      |                                       |
| 49 | NGO  | Non-Governmental Organisation         |
| 50 |      |                                       |
| 51 | PEC  | Primary Eye Care                      |
| 52 |      |                                       |
| 53 | PHC  | Primary Health Care                   |
| 54 |      |                                       |
| 55 | SSA  | sub Saharan Africa                    |
| 56 |      |                                       |
| 57 |      |                                       |
| 58 |      |                                       |
| 59 |      |                                       |
| 60 |      |                                       |



## Declarations

### Ethics approval and consent to participate.

This was part of a wider study on PEC, and ethical approval was obtained from the Ethics Committees of the Federal Ministry of Health, Nigeria (NHREC Approval Number NHREC/01/01/2007-12/03/2018) and the London School of Hygiene & Tropical Medicine (LSHTM Ethics Ref: 14624).

### Consent for publication

Not Applicable

### Availability of data and materials

The datasets used and/or analysed during the current study are available from the corresponding author on reasonable request.

### Competing interests

The authors declare that they have no competing interests

### Author Contributions

AA, HB and CG were responsible for the design and conception of the work. WM, HF, RU, UE, SI, FK, BW contributed to the acquisition of data. AA drafted the work. AA, HB and CG substantially revised it. All authors made some input into the final version and have approved the submitted version.

### Funding

This research was made possible by a grant from the Queen Elizabeth Diamond Jubilee Trust, United Kingdom, coordinated through the Commonwealth Eye health Consortium, UK. The funding organisations had no role in the design and conduct of the research.

### Acknowledgements

We acknowledge the support of David MacCleod, Statistician at the LSHTM for guidance in developing the Delphi questionnaire and Renee du Toit, independent eye health consultant, South Africa for her input into the analysis of the Delphi questionnaire.

## REFERENCES

1. International Agency for the Prevention of Blindness. Vision Atlas. <http://atlasiapborg/>. 2016(23rd April 2019).
2. Bourne RR, Flaxman SR, Braithwaite T, Cicinelli MV, Das A, Jonas JB, et al. Magnitude, temporal trends, and projections of the global prevalence of blindness and distance and near vision impairment: a systematic review and meta-analysis. *The Lancet Global Health*. 2017;5(9):e888-e97.
3. Kimani K, Lindfield R, Senyonjo L, Mwaniki A, Schmidt E. Prevalence and causes of ocular morbidity in Mbeere District, Kenya. Results of a population-based survey. *PLoS One*. 2013;8(8):e70009.
4. Senyonjo L, Lindfield R, Mahmoud A, Kimani K, Sanda S, Schmidt E. Ocular Morbidity and Health Seeking Behaviour in Kwara State, Nigeria: Implications for Delivery of Eye Care Services. *PLoS One*. 2014;9(8):e104128.
5. Murthy G, Raman U. Perspectives on primary eye care. *COMMUNITY EyE HEALTH JOURNAL*. 2009;22(69).
6. Andriamanjato HH, Mathenge W, Kalua K, Courtright P, Lewallen S. Task shifting in primary eye care: how sensitive and specific are common signs and symptoms to predict conditions requiring referral to specialist eye personnel. *Human Resources for Health*. 2014;12(Suppl 1):S3.
7. Graham R. Facing the crisis in human resources for eye health in sub-Saharan Africa. *Community eye health*. 2017;30(100):85.
8. Aghaji AE, Gilbert C, Ihebuzor N, Faal H. Strengths, challenges and opportunities of implementing primary eye care in Nigeria. *BMJ global health*. 2018;3(6):e000846.
9. World Health Organization. Universal eye health: a global action plan 2014–2019 <http://www.who.int/blindness>. AP2014\_19\_English pdf. 2013.
10. Courtright P, Seneadza A, Mathenge W, Elish E, Lewallen S. Primary eye care in sub-Saharan African: do we have the evidence needed to scale up training and service delivery? *Annals of tropical medicine and parasitology*. 2010;104(5):361-7.
11. World Health Organisation. Report of the Expert Group Meeting to Assess and Validate a Package for Eye Health Interventions at the Primary Level for the African Region. 2012.
12. World Health Organisation Africa Region. Primary Eye Care Training Manual-A course to strengthen the capacity of health personnel to manage eye patients at primary-level health facilities in the African Region. Brazzaville: World Health Organization. Regional Office for Africa 2018. p. <https://www.afro.who.int/publications/primary-eye-care-training-manual>.
13. Snowdon W, Lawrence M, Schultz J, Vivili P, Swinburn B. Evidence-informed process to identify policies that will promote a healthy food environment in the Pacific Islands. *Public health nutrition*. 2010;13(06):886-92.
14. Gericke CA, Kurowski C, Ranson MK, Mills A. Intervention complexity: a conceptual framework to inform priority-setting in health. *Bulletin of the World Health Organization*. 2005;83(4):285-93.
15. Hsu C-C, Sandford BA. The Delphi technique: making sense of consensus. *Practical assessment, research & evaluation*. 2007;12(10):1-8.
16. Skulmoski GJ, Hartman FT, Krahn J. The Delphi method for graduate research. *Journal of Information Technology Education: Research*. 2007;6(1):1-21.
17. Wu F, Khlangwiset P. Evaluating the technical feasibility of aflatoxin risk reduction strategies in Africa. *Food Additives and Contaminants*. 2010;27(5):658-76.
18. Du Toit R, Faal HB, Etya'ale D, Wiafe B, Mason I, Graham R, et al. Evidence for integrating eye health into primary health care in Africa: a health systems strengthening approach. *BMC health services research*. 2013;13(1):102.
19. Dudovskiy J. Snowballing. <https://research-methodology.net/sampling-in-primary-data-collection/snowball-sampling/> 2019; Accessed 23rd January 2019.

- 1
- 2
- 3
- 4 20. Hsu C-C, Sandford BA. The Delphi technique: making sense of consensus. *Practical Assessment, Research, and Evaluation*. 2007;12(1):10.
- 5
- 6 21. Guan L, Gao P, Liu S, Liu Y, Li X, Liu F, et al. Development of a global health bachelor curriculum in China: a Delphi study. *BMJ open*. 2019;9(1).
- 7
- 8 22. World Health Organization. Everybody's business--strengthening health systems to improve health outcomes: WHO's framework for action. 2007.
- 9
- 10 23. Bright T, Kuper H, Macleod D, Musendo D, Irunga P, Yip JL. Population need for primary eye care in Rwanda: A national survey. *PloS one*. 2018;13(5):e0193817.
- 11
- 12 24. Lilian RR, Railton J, Schaftenaar E, Mabitsi M, Grobbelaar CJ, Khosa NS, et al. Strengthening primary eye care in South Africa: An assessment of services and prospective evaluation of a health systems support package. *PloS one*. 2018;13(5):e0197432.
- 13
- 14 25. Topp SM, Abimbola S, Joshi R, Negin J. How to assess and prepare health systems in low-and middle-income countries for integration of services—a systematic review. *Health policy and planning*. 2017;33(2):298-312.
- 15
- 16 26. Blanchet K, Gilbert C, de Savigny D. Rethinking eye health systems to achieve universal coverage: the role of research. *The British journal of ophthalmology*. 2014;98(10):1325-8.
- 17
- 18 27. Chol C, Negin J, Garcia-Basteiro A, Gebrehiwot TG, Debru B, Chimpolo M, et al. Health system reforms in five sub-Saharan African countries that experienced major armed conflicts (wars) during 1990–2015: a literature review. *Global health action*. 2018;11(1):1517931.
- 19
- 20 28. Müller A, Murenzi J, Mathenge W, Munana J, Courtright P. Primary eye care in Rwanda: gender of service providers and other factors associated with effective service delivery. *Tropical Medicine & International Health*. 2010;15(5):529-33.
- 21
- 22 29. Adekoya B, Ayanniyi A, Adepoju F, Omolase C, Owwoye J. Minimising corneal scarring from the use of harmful traditional eye remedies in developing countries. *Nigerian quarterly journal of hospital medicine*. 2012;22(2):138-41.
- 23
- 24 30. Blanchet K, Lindfield R. Health Systems and eye care: A way forward. *IAPB Briefing Papers*. 2010.
- 25
- 26 31. Shah K, Naidoo K, Loughman J. Development of socially responsive competency frameworks for ophthalmic technicians and optometrists in Mozambique. *Clinical and Experimental Optometry*. 2016;99(2):173-82.
- 27
- 28 32. Hohmann E, Brand JC, Rossi MJ, Lubowitz JH. Expert opinion is necessary: Delphi panel methodology facilitates a scientific approach to consensus. Elsevier; 2018.
- 29
- 30 33. Rowe AK, De Savigny D, Lanata CF, Victora CG. How can we achieve and maintain high-quality performance of health workers in low-resource settings? *The Lancet*. 2005;366(9490):1026-35.
- 31
- 32 34. World Health Organization. Decision-making for guideline development at WHO. 2014. In: WHO handbook for guideline development [Internet]. Geneva: World Health Organization. 2nd. [201-14].
- 33
- 34 35. Ferri CP, Prince M, Brayne C, Brodaty H, Fratiglioni L, Ganguli M, et al. Global prevalence of dementia: a Delphi consensus study. *The lancet*. 2005;366(9503):2112-7.
- 35
- 36
- 37
- 38
- 39
- 40
- 41
- 42
- 43
- 44
- 45
- 46
- 47
- 48
- 49
- 50
- 51
- 52
- 53
- 54
- 55
- 56
- 57
- 58
- 59
- 60

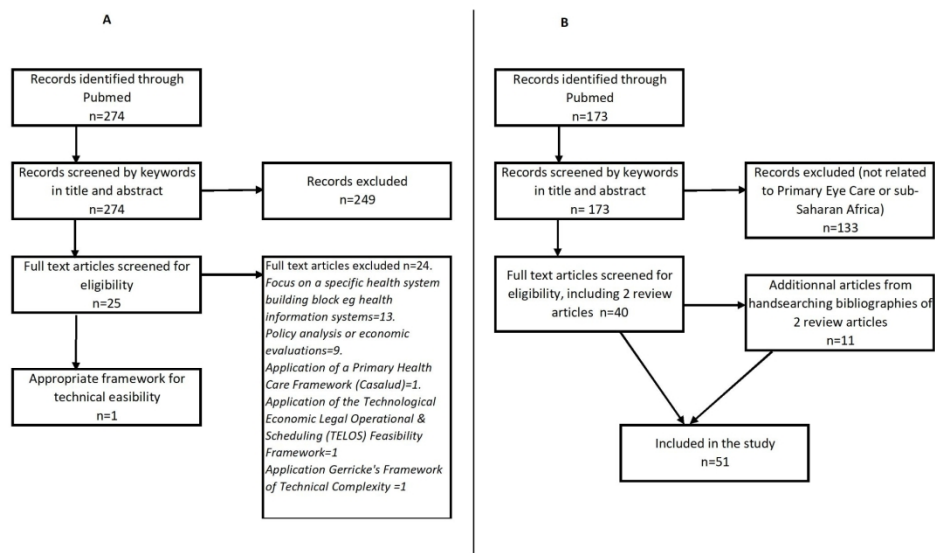

Figure 1. Literature searches for A, technical feasibility framework, and B primary eye care in sub-Saharan Africa

Figure 1. Literature searches for A, technical feasibility framework, and B primary eye care in sub-Saharan Africa.

235x149mm (240 x 240 DPI)

## Appendix 1

## Delphi Round 1 Health Promotion

## Technical Complexity of community based interventions which comprises health promotion and prevention

Health promotion includes health messages for healthy people; health prevention comprises health messages for people at risk for eye diseases targeting children and their carers, those aged 40 years and above, people of all ages and those with diabetes.

| Category                         | Criteria                                                                                                                                                                           | Technical Complexity<br>(Elements that need to be addressed)                                                                                                                                                                                        | Strongly Agree                                                                                                                                      |      | Agree |      | Disagree |      | Strongly disagree |      |     |
|----------------------------------|------------------------------------------------------------------------------------------------------------------------------------------------------------------------------------|-----------------------------------------------------------------------------------------------------------------------------------------------------------------------------------------------------------------------------------------------------|-----------------------------------------------------------------------------------------------------------------------------------------------------|------|-------|------|----------|------|-------------------|------|-----|
|                                  |                                                                                                                                                                                    |                                                                                                                                                                                                                                                     | n                                                                                                                                                   | %    | n     | %    | n        | %    | n                 | %    |     |
| Intervention characteristics     | Stability: usable lifetime and risk of destruction                                                                                                                                 | Posters for health Prevention and promotion are needed.                                                                                                                                                                                             | 7                                                                                                                                                   | 77.8 | 2     | 22.2 | 0        | 0    | 0                 | 0.0  |     |
|                                  |                                                                                                                                                                                    | Posters should be made durable by lamination.                                                                                                                                                                                                       | 5                                                                                                                                                   | 55.6 | 2     | 22.2 | 2        | 22.2 | 0                 | 0.0  |     |
|                                  | Standardizability: the degree to which an intervention can be standardized                                                                                                         | The Posters should be standardised by having the same message per target group.                                                                                                                                                                     | 6                                                                                                                                                   | 66.7 | 3     | 33.3 | 0        | 0    | 0                 | 0.0  |     |
|                                  |                                                                                                                                                                                    | This should be translated into the language of the community as is done for other health promotion posters.                                                                                                                                         | 7                                                                                                                                                   | 77.8 | 2     | 22.2 | 0        | 0    | 0                 | 0.0  |     |
| Basic product design             | Safety profile of the intervention in terms of adverse effects, and risks associated with inappropriate use, e.g. from over-the-counter sales of prescription-only medications.    | No risk of serious side effects.                                                                                                                                                                                                                    | 5                                                                                                                                                   | 55.6 | 1     | 11.1 | 2        | 22.2 | 1                 | 11.1 |     |
|                                  |                                                                                                                                                                                    | Messages should be clear, unambiguous and understandable displaying appropriate information.                                                                                                                                                        | 8                                                                                                                                                   | 88.9 | 1     | 11.1 | 0        | 0    | 0                 | 0.0  |     |
|                                  | Ease of storage e.g. the need for refrigeration. Ease of transport                                                                                                                 | Health promotion materials do not have any specific requirements for storage and transportation.                                                                                                                                                    | 4                                                                                                                                                   | 44.4 | 4     | 44.4 | 1        | 11.1 | 0                 | 0.0  |     |
| Supplies                         | Need for regular supplies, and the number and types of different supplies needed. Ease of acquisition.                                                                             | No requirements for regular supplies.                                                                                                                                                                                                               | 2                                                                                                                                                   | 22.2 | 6     | 66.7 | 1        | 11.1 | 0                 | 0.0  |     |
|                                  |                                                                                                                                                                                    | Different types of posters are be needed for different target groups, e.g. diabetics, the elderly, carers of young children.                                                                                                                        | 7                                                                                                                                                   | 77.8 | 2     | 22.2 | 0        | 0    | 0                 | 0.0  |     |
| Equipment                        | High-technology equipment and infrastructure needed. Ease of acquisition.                                                                                                          | High technological equipment not required.                                                                                                                                                                                                          | 4                                                                                                                                                   | 44.4 | 4     | 44.4 | 1        | 11.1 | 0                 | 0.0  |     |
|                                  |                                                                                                                                                                                    | Number of different types of equipment needed. Maintenance needed.                                                                                                                                                                                  | 6                                                                                                                                                   | 66.7 | 3     | 33.3 | 0        | 0    | 0                 | 0.0  |     |
| Delivery characteristics         |                                                                                                                                                                                    | Health promotion materials relatively easy to acquire.                                                                                                                                                                                              | 3                                                                                                                                                   | 33.3 | 4     | 44.4 | 2        | 22.2 | 0                 | 0.0  |     |
|                                  |                                                                                                                                                                                    | Retail sector, Outreach services, First-level care, Hospital care                                                                                                                                                                                   | Should be delivered in the community through outreach services for diabetics, carers of young children during maternal and child health activities. | 3    | 33.3  | 4    | 44.4     | 2    | 22.2              | 0    | 0.0 |
|                                  |                                                                                                                                                                                    |                                                                                                                                                                                                                                                     | Should be delivered to specific <b>groups</b> that attend the primary health facility e.g. people over 40 years,                                    | 4    | 44.4  | 1    | 11.1     | 4    | 44.4              | 0    | 0.0 |
| Facilities                       | Skill level required for service provision                                                                                                                                         | Should be delivered to specific <b>people</b> that attend the primary health facility e.g. people over 40 years,                                                                                                                                    | 4                                                                                                                                                   | 44.4 | 1     | 11.1 | 3        | 33.3 | 1                 | 11.1 |     |
|                                  |                                                                                                                                                                                    | Low skill requirement.                                                                                                                                                                                                                              | 2                                                                                                                                                   | 22.2 | 3     | 33.3 | 1        | 11.1 | 3                 | 33.3 |     |
|                                  |                                                                                                                                                                                    | Will require knowledge about community, eye diseases and where to access care.                                                                                                                                                                      | 6                                                                                                                                                   | 66.7 | 2     | 22.2 | 1        | 11.1 | 0                 | 0.0  |     |
| Human resources                  | Need for managerial staff: Management and planning requirements.                                                                                                                   | Village Health Workers who live in the community should be trained to deliver health promotion in the communities.                                                                                                                                  | 6                                                                                                                                                   | 66.7 | 3     | 33.3 | 0        | 0    | 0                 | 0.0  |     |
|                                  |                                                                                                                                                                                    | Facility based workers should deliver health prevention to groups/individuals in the facility.                                                                                                                                                      | 2                                                                                                                                                   | 22.2 | 6     | 66.7 | 1        | 11.1 | 0                 | 0.0  |     |
|                                  |                                                                                                                                                                                    | Development of the health promotion materials and staff training will require professional instruction.                                                                                                                                             | 5                                                                                                                                                   | 55.6 | 4     | 44.4 | 0        | 0    | 0                 | 0.0  |     |
|                                  |                                                                                                                                                                                    | Mid-level skill required to supervise health promotion/prevention activities.                                                                                                                                                                       | 3                                                                                                                                                   | 33.3 | 5     | 55.6 | 0        | 0    | 0                 | 0.0  |     |
|                                  |                                                                                                                                                                                    | Health Promotion and prevention activities should be delivered on schedule.                                                                                                                                                                         | 6                                                                                                                                                   | 66.7 | 3     | 33.3 | 0        | 0    | 0                 | 0.0  |     |
| Communication and transport      | Dependence of delivery on communication and transport infrastructure: roads, telephones, need for substantial exchange of information between different sectors or levels of care. | Planning will be required to organise target audience to be sensitised in appropriate locations e.g. Mothers or care givers of young children.                                                                                                      | 7                                                                                                                                                   | 77.8 | 2     | 22.2 | 0        | 0    | 0                 | 0.0  |     |
|                                  |                                                                                                                                                                                    | Local transport infrastructure will be needed to visit communities.                                                                                                                                                                                 | 4                                                                                                                                                   | 44.4 | 3     | 33.3 | 2        | 22.2 | 0                 | 0.0  |     |
|                                  |                                                                                                                                                                                    | Communication between the communities and the Front Line Health Facilities required.                                                                                                                                                                | 7                                                                                                                                                   | 77.8 | 2     | 22.2 | 0        | 0    | 0                 | 0.0  |     |
| Government capacity requirements | Need for legislation/regulation, monitoring regulatory measures. Need for enforcement of regulation.                                                                               | Communication in local language required.                                                                                                                                                                                                           | 7                                                                                                                                                   | 77.8 | 2     | 22.2 | 0        | 0    | 0                 | 0.0  |     |
|                                  |                                                                                                                                                                                    | No special legislation required.                                                                                                                                                                                                                    | 3                                                                                                                                                   | 33.3 | 3     | 33.3 | 1        | 11.1 | 2                 | 22.2 |     |
|                                  |                                                                                                                                                                                    | A national prevention of blindness strategy will be ideal as is advocated in the Global Action Plan.                                                                                                                                                | 7                                                                                                                                                   | 77.8 | 2     | 22.2 | 0        | 0    | 0                 | 0.0  |     |
| Regulation/legislation           | Need for sophisticated management systems. Need for managerial staff. Level of management and planning requirements.                                                               | No need for sophisticated management systems.                                                                                                                                                                                                       | 2                                                                                                                                                   | 22.2 | 6     | 66.7 | 1        | 11.1 | 0                 | 0.0  |     |
|                                  |                                                                                                                                                                                    | Health Promotion logistics should be managed by managerial structure at frontline health facilities.                                                                                                                                                | 5                                                                                                                                                   | 55.6 | 2     | 22.2 | 1        | 11.1 | 1                 | 11.1 |     |
| Management systems               | Need for inter-sectoral action within government. Need for partnership between government and civil society. Need for partnership between government and external funding agencies | There is need for intersectoral action within government in trachoma endemic areas to implement water sanitation and hygiene programmes.                                                                                                            | 8                                                                                                                                                   | 88.9 | 1     | 11.1 | 0        | 0    | 0                 | 0.0  |     |
|                                  |                                                                                                                                                                                    | Eye health promotion could be effectively done in schools.                                                                                                                                                                                          | 6                                                                                                                                                   | 66.7 | 3     | 33.3 | 0        | 0    | 0                 | 0.0  |     |
| Collaborative action             |                                                                                                                                                                                    | Health Promotion will require collaboration with NGOs.                                                                                                                                                                                              | 4                                                                                                                                                   | 44.4 | 4     | 44.4 | 1        | 11.1 | 0                 | 0.0  |     |
|                                  |                                                                                                                                                                                    | Collaboration between communities and Front Line Health Facilities is required.                                                                                                                                                                     | 7                                                                                                                                                   | 77.8 | 2     | 22.2 | 0        | 0    | 0                 | 0.0  |     |
|                                  |                                                                                                                                                                                    | Information and education of the target population in the community is necessary.                                                                                                                                                                   | 7                                                                                                                                                   | 77.8 | 1     | 11.1 | 1        | 11.1 | 0                 | 0.0  |     |
| Usage characteristics            | Need for information and education                                                                                                                                                 | Supervision of the Village Health Workers is important.                                                                                                                                                                                             | 8                                                                                                                                                   | 88.9 | 1     | 11.1 | 0        | 0    | 0                 | 0.0  |     |
|                                  |                                                                                                                                                                                    | The burden of ocular morbidity/BL/VI has been established in many setting in LMICs, but the demand for eye care services is low. Significant level of health promotion needed.                                                                      | 7                                                                                                                                                   | 77.8 | 1     | 11.1 | 1        | 11.1 | 0                 | 0.0  |     |
| Ease of use                      | Need for supervision                                                                                                                                                               | In some communities, itinerant couchers and traditional healers may compete with orthodox eye care practitioners for the patients. Need to limit harmful practices of traditional eye healers by engaging them in eye health prevention activities. | 4                                                                                                                                                   | 44.4 | 4     | 44.4 | 1        | 11.1 | 0                 | 0.0  |     |
|                                  |                                                                                                                                                                                    | Need to prevent resale/counterfeiting                                                                                                                                                                                                               |                                                                                                                                                     |      |       |      |          |      |                   |      |     |
| Pre-existing demand              | Need for promotion                                                                                                                                                                 |                                                                                                                                                                                                                                                     |                                                                                                                                                     |      |       |      |          |      |                   |      |     |
|                                  |                                                                                                                                                                                    |                                                                                                                                                                                                                                                     |                                                                                                                                                     |      |       |      |          |      |                   |      |     |
| Black market risk                | Need to prevent resale/counterfeiting                                                                                                                                              |                                                                                                                                                                                                                                                     |                                                                                                                                                     |      |       |      |          |      |                   |      |     |
|                                  |                                                                                                                                                                                    |                                                                                                                                                                                                                                                     |                                                                                                                                                     |      |       |      |          |      |                   |      |     |

Delphi Round 1 Facility Case Management

Technical Complexity of facility-based intervention

| Category                         | Criteria                                                                                                                                  | Technical Complexity (elements that need to be addressed)                                                                                                                    | Strongly Agree |      | Agree |      | Disagree |      | Strongly disagree |      |
|----------------------------------|-------------------------------------------------------------------------------------------------------------------------------------------|------------------------------------------------------------------------------------------------------------------------------------------------------------------------------|----------------|------|-------|------|----------|------|-------------------|------|
|                                  |                                                                                                                                           |                                                                                                                                                                              | n              | %    | n     | %    | n        | %    | n                 | %    |
| Intervention characteristics     |                                                                                                                                           | Batteries for torches are not stable in hot climates. Will require frequent replacement.                                                                                     | 1              | 11.1 | 2     | 22.2 | 5        | 55.6 | 2                 | 22.2 |
|                                  |                                                                                                                                           | Eye drops will require cool storage.                                                                                                                                         | 1              | 11.1 | 5     | 55.6 | 2        | 22.2 | 1                 | 11.1 |
|                                  |                                                                                                                                           | Tetanus toxoid will require cold storage (refrigeration)                                                                                                                     | 6              | 66.7 | 1     | 11.1 | 1        | 11.1 | 0                 | 0.0  |
|                                  | Stability/ease of storage/ease of transport                                                                                               | Topical antibiotic ointment does not need cold storage                                                                                                                       | 4              | 44.4 | 4     | 44.4 | 1        | 11.1 | 0                 | 0.0  |
| Basic product design             |                                                                                                                                           | Injectable antibiotics for ophthalmia neonatorum will require cold storage                                                                                                   | 2              | 22.2 | 4     | 44.4 | 1        | 11.1 | 1                 | 11.1 |
|                                  |                                                                                                                                           | Sterile saline solution for eye irrigation is needed and is stable                                                                                                           | 6              | 66.7 | 3     | 33.3 | 0        | 0    | 0                 | 0.0  |
|                                  |                                                                                                                                           | High dose vitamin A is needed and is stable                                                                                                                                  | 4              | 44.4 | 5     | 55.6 | 0        | 0    | 0                 | 0.0  |
|                                  |                                                                                                                                           | All the above consummables will be transported by pre existing PHC transport channels                                                                                        | 8              | 88.9 | 1     | 11.1 | 0        | 0    | 0                 | 0.0  |
| Standardizability                |                                                                                                                                           | The WHO AFROC PEC package as 5 algorithms for facility-based care with 12 protocols and 7 standards. Hence the intervention is standardized.                                 | 6              | 66.7 | 3     | 33.3 | 0        | 0    | 0                 | 0.0  |
|                                  | Safety profile                                                                                                                            | None of the products cause any harm, if delivered correctly                                                                                                                  | 4              | 44.4 | 4     | 44.4 | 1        | 11.1 | 0                 | 0.0  |
| Supplies                         | Need for regular supplies                                                                                                                 | Regular supplies of eye medication are needed.                                                                                                                               | 8              | 88.9 | 1     | 11.1 | 0        | 0    | 0                 | 0.0  |
|                                  | High-technology equipment and infrastructure needed                                                                                       | Diagnostic equipment needed: Snellen distance visual acuity chart; near visual acuity chart, torches and batteries.                                                          | 6              | 66.7 | 3     | 33.3 | 0        | 0    | 0                 | 0.0  |
| Equipment                        |                                                                                                                                           | Infrastructure: 6m distance to measure visual acuity.                                                                                                                        | 1              | 11.1 | 4     | 44.4 | 3        | 33.3 | 1                 | 11.1 |
|                                  |                                                                                                                                           | Space for counselling required.                                                                                                                                              | 4              | 44.4 | 5     | 55.6 | 0        | 0    | 0                 | 0.0  |
|                                  | Number of different types of equipment needed                                                                                             | One set of diagnostic equipment per facility is needed                                                                                                                       | 3              | 33.3 | 5     | 55.6 | 1        | 11.1 | 0                 | 0.0  |
| Maintenance needed               | Torch batteries will need to be changed.                                                                                                  | 2                                                                                                                                                                            | 22.2           | 5    | 55.6  | 0    | 0        | 1    | 11.1              |      |
| Delivery characteristics         |                                                                                                                                           |                                                                                                                                                                              | Strongly Agree |      | Agree |      | Disagree |      | Strongly disagree |      |
|                                  |                                                                                                                                           |                                                                                                                                                                              | n              | %    | n     | %    | n        | %    | n                 | %    |
|                                  | Retail sector                                                                                                                             | Not applicable                                                                                                                                                               | 0              | 0    | 1     | 11.1 | 6        | 66.7 | 2                 | 22.2 |
|                                  | Outreach services                                                                                                                         | None (see health promotion framework)                                                                                                                                        | 1              | 11.1 | 0     | 0.0  | 5        | 55.6 | 3                 | 22.2 |
|                                  | First-level care                                                                                                                          | Diagnoses of management of uncomplicated cases can be delivered in Primary Health Centres and Health Posts.                                                                  | 5              | 55.6 | 4     | 44.4 | 0        | 0    | 0                 | 0    |
|                                  | Hospital care                                                                                                                             | Hospital services are needed for referrals, severe cases and treatment failures, further investigations and management, as required.                                         | 7              | 77.8 | 2     | 22.2 | 0        | 0    | 0                 | 0    |
|                                  |                                                                                                                                           | Mid-level skill is required to make a diagnosis (eliciting a history; measuring visual acuity; basic eye examination)                                                        | 7              | 77.8 | 1     | 11.1 | 0        | 0    | 0                 | 0    |
|                                  | Skill level required for service provision                                                                                                | Mid-level skill is required for management of some conditions e.g., eye irrigation; removal of foreign bodies; giving intramuscular injections (tetanus toxoid; antibiotics) | 5              | 55.6 | 2     | 22.2 | 0        | 0    | 1                 | 11.1 |
|                                  |                                                                                                                                           | Mid-level skill is required for identifying which cases to refer and the level of urgency                                                                                    | 5              | 55.6 | 2     | 22.2 | 0        | 0    | 0                 | 0.0  |
|                                  | Skill level required for staff supervision. Degree of supervision required.                                                               | Primary Health Care supervisors need a good level of knowledge of eye conditions and their management and be skilled in the above. activity needed.                          | 5              | 55.6 | 3     | 33.3 | 0        | 0    | 1                 | 11.1 |
| Human resources                  |                                                                                                                                           | Regular supervision of PEC required.                                                                                                                                         | 8              | 88.9 | 1     | 11.1 | 0        | 0    | 0                 | 0    |
|                                  | Intensity of professional services in terms of frequency or duration, e.g. on schedule/periodic or continuous to accommodate emergencies. | Primary Health Care workers trained in eye care should be available continuously to manage emergencies                                                                       | 7              | 77.8 | 2     | 22.2 | 0        | 0    | 0                 | 0    |
|                                  |                                                                                                                                           | Managerial staff needed to manage supplies of consumables and plan purchasing                                                                                                | 3              | 33.3 | 5     | 55.6 | 1        | 11.1 | 0                 | 0    |
|                                  | Management and planning requirements. Need for managerial staff                                                                           | Managerial staff needed to establish and maintain referral and feedback mechanisms between the PH centre and eye department/clinic.                                          | 4              | 44.4 | 2     | 22.2 | 3        | 33.3 | 0                 | 0    |
|                                  |                                                                                                                                           | Managerial systems to coordinate staff rotations to ensure daily facility coverage by trained PEC staff.                                                                     | 5              | 55.6 | 3     | 33.3 | 1        | 11.1 | 0                 | 0    |
| Communication and Transport      | Depends on delivery of communication and transport infrastructure                                                                         | Depends on communication to establish and maintain referral and feedback mechanisms between PH centres and eye department/clinic. Respond to feedback from referrals.        | 7              | 77.8 | 2     | 22.2 | 0        | 0    | 0                 | 0    |
|                                  |                                                                                                                                           | Transportation between PH Centre and referral centre imperative.                                                                                                             | 6              | 66.7 | 2     | 22.2 | 1        | 11.1 | 0                 | 0    |
| Government capacity requirements |                                                                                                                                           |                                                                                                                                                                              | Strongly Agree |      | Agree |      | Disagree |      | Strongly disagree |      |
|                                  |                                                                                                                                           |                                                                                                                                                                              | n              | %    | n     | %    | n        | %    | n                 | %    |
|                                  | Need for regulation.                                                                                                                      | Appropriate medication & equipment need to be on the national essential drug list to facilitate availability.                                                                | 8              | 88.9 | 1     | 11.1 | 0        | 0    | 0                 | 0    |
|                                  | Need for monitoring regulatory measures. Need for enforcement of regulation.                                                              | There is need for regulation of drug prescription and dispensing by appropriate staff.                                                                                       | 7              | 77.8 | 2     | 22.2 | 0        | 0    | 0                 | 0    |
| Regulation/legislation           |                                                                                                                                           | Measles is a notifiable condition and should be reported to appropriate regulatory authorities.                                                                              | 8              | 88.9 | 0     | 0.0  | 1        | 11.1 | 0                 | 0    |
|                                  |                                                                                                                                           | Ophthalmia neonatorum is a notifiable condition and should be reported                                                                                                       | 6              | 66.7 | 1     | 11.1 | 2        | 22.2 | 0                 | 0    |
| Management systems               | Need for sophisticated management systems                                                                                                 | No need for sophisticated management systems                                                                                                                                 | 2              | 22.2 | 5     | 55.6 | 2        | 22.2 | 0                 | 0    |
|                                  | Need for inter-sectoral action within government. Need for partnership between government and civil society.                              | Intersectoral action withingovernment or partnerships between government and civil society are desirable but not mandatory.                                                  | 4              | 44.4 | 4     | 44.4 | 1        | 11.1 | 0                 | 0    |
| Collaborative action             | Need for partnership between government and external funding agencies                                                                     | Need for partnerships between governments and NGOs.                                                                                                                          | 4              | 44.4 | 5     | 55.6 | 0        | 0    | 0                 | 0    |
|                                  |                                                                                                                                           | NGOs are responsible for the bulk of eye care in LMICs.                                                                                                                      | 2              | 22.2 | 5     | 55.6 | 2        | 22.2 | 0                 | 0    |
| Usage characteristics            |                                                                                                                                           |                                                                                                                                                                              | Strongly Agree |      | Agree |      | Disagree |      | Strongly disagree |      |
|                                  |                                                                                                                                           |                                                                                                                                                                              | n              | %    | n     | %    | n        | %    | n                 | %    |
| Ease of use                      |                                                                                                                                           | Outcomes of consultation at the PH Centre will be reassurance, treatment (and) or referral. At this level, prescribed treatments may not require supervision at home.        | 3              | 33.3 | 3     | 33.3 | 3        | 33.3 | 0                 | 0    |
|                                  | Need for supervision                                                                                                                      | Referrals to secondary centres may require supervision to ensure compliance and may have to be supported.                                                                    | 7              | 77.8 | 2     | 22.2 | 0        | 0    | 0                 | 0    |
| Pre-existing demand              | Need for promotion                                                                                                                        | The burden of ocular morbidity/BLVI has been established in many setting in LMICs but the demand for eye care services is low. Significant level of health promotion needed. | 7              | 77.8 | 2     | 22.2 | 0        | 0    | 0                 | 0    |
| Black market risk                | Need to prevent resale/counterfeiting                                                                                                     | Need to limit harmful practices of traditional eye healers by training them to identify and refer eye conditions.                                                            | 6              | 66.7 | 3     | 33.3 | 0        | 0    | 0                 | 0    |

## Appendix 2

## Modifications made in the technical complexity requirements after Delphi round 1

| Gericke's Framework Dimensions                                                                                                                               | WHO AFRO PEC Package Component                                                                                                                                                                                                                                                     |                                                                                                                                                                                                                                                                                                                                                                                                                                                        |
|--------------------------------------------------------------------------------------------------------------------------------------------------------------|------------------------------------------------------------------------------------------------------------------------------------------------------------------------------------------------------------------------------------------------------------------------------------|--------------------------------------------------------------------------------------------------------------------------------------------------------------------------------------------------------------------------------------------------------------------------------------------------------------------------------------------------------------------------------------------------------------------------------------------------------|
|                                                                                                                                                              | Health Promotion and Prevention                                                                                                                                                                                                                                                    | Case Facility Management                                                                                                                                                                                                                                                                                                                                                                                                                               |
|                                                                                                                                                              | Statements Modified                                                                                                                                                                                                                                                                |                                                                                                                                                                                                                                                                                                                                                                                                                                                        |
| <b>Intervention Characteristics</b><br><u>Basic Product Design</u><br><br><u>Equipment</u>                                                                   | Community Health Workers should be instructed on the potential side effects of any health Promotion materials.                                                                                                                                                                     | Torches can be solar- powered and are stable.<br><br>Appropriate and secure storage for drugs and consummables should be available.<br><br>Eye drops that do not require cool storage should be stocked.<br><br>Injectable antibiotics for ophthalmia neonatorum may require cool storage but should be available to treat other conditions.<br><br>Adequate space to support the use of appropriate and standardized visual acuity charts.eg 3m or 6m |
| <b>Delivery Characteristics</b><br><u>Type of Facility needed</u><br><br><u>Human Resource Requirement</u><br><u>Communication and Transport</u>             | Availability of community leaders to deliver eye health promotion when required<br><br>Opportunistic eye health promotion can be delivered to groups in the facility<br><br>Opportunistic health promotion can be delivered to individual people in the facility- if time permits. | Existing managerial facility staff should be able to establish and maintain referral and feedback mechanisms between the PH centre                                                                                                                                                                                                                                                                                                                     |
| <b>Government Capacity Requirements</b><br><u>Regulation/Legislation</u><br><br><b>Usage Characteristics</b><br><u>Ease of use&amp; Need for Supervision</u> | Health promotion materials should be approved and endorsed by local regulatory authorities.<br>Eye health promotion activities should be recorded and monitored.                                                                                                                   | Staff who are available to make supervisory home visits.                                                                                                                                                                                                                                                                                                                                                                                               |

Appendix 3

Delphi Round 2 Health Promotion

Technical Capacity for community based interventions which comprises health promotion and prevention

| Category                                | Criteria                                                                                                                                                                           | Technical Complexity                                                                                                                                                                                                                                | Technical Capacity needed            |              |                 |                          |   |      |   |      |
|-----------------------------------------|------------------------------------------------------------------------------------------------------------------------------------------------------------------------------------|-----------------------------------------------------------------------------------------------------------------------------------------------------------------------------------------------------------------------------------------------------|--------------------------------------|--------------|-----------------|--------------------------|---|------|---|------|
|                                         |                                                                                                                                                                                    | (Elements that need to be addressed)                                                                                                                                                                                                                | (Elements that need to be available) |              |                 |                          |   |      |   |      |
| <b>Intervention characteristics</b>     |                                                                                                                                                                                    |                                                                                                                                                                                                                                                     | <b>Strongly Agree</b>                | <b>Agree</b> | <b>Disagree</b> | <b>Strongly disagree</b> |   |      |   |      |
|                                         |                                                                                                                                                                                    |                                                                                                                                                                                                                                                     | n                                    | %            | n               | %                        | n | %    | n | %    |
| <b>Basic product design</b>             | Stability: usable lifetime and risk of destruction                                                                                                                                 | Posters for health Prevention and promotion are needed.                                                                                                                                                                                             | 7                                    | 77.8         | 2               | 22.2                     | 0 | 0    | 0 | 0    |
|                                         |                                                                                                                                                                                    | Posters should be made durable by lamination.                                                                                                                                                                                                       | 4                                    | 44.4         | 5               | 55.6                     | 0 | 0    | 0 | 0    |
|                                         | Standardizability: the degree to which an intervention can be standardized                                                                                                         | The Posters should be standardised by having the same message per target group.                                                                                                                                                                     | 5                                    | 55.6         | 4               | 44.4                     | 0 | 0    | 0 | 0    |
|                                         |                                                                                                                                                                                    | This should be translated into the language of the community as is done for other health promotion posters.                                                                                                                                         | 6                                    | 66.7         | 1               | 11.1                     | 2 | 22.2 | 0 | 0    |
|                                         | Safety profile of the intervention in terms of adverse effects, and risks associated with inappropriate use, e.g. from over-the-counter sales of prescription-only medications.    | No risk of serious side effects.                                                                                                                                                                                                                    | 3                                    | 33.3         | 3               | 33.3                     | 2 | 22.2 | 1 | 11.1 |
| <b>Supplies</b>                         | Ease of storage e.g. the need for refrigeration. Ease of transport                                                                                                                 | Messages should be clear, unambiguous and understandable displaying appropriate information.                                                                                                                                                        | 8                                    | 88.9         | 1               | 11.1                     | 0 | 0    | 0 | 0    |
|                                         |                                                                                                                                                                                    | Health promotion materials do not have any specific requirements for storage and transportation.                                                                                                                                                    | NA                                   |              |                 |                          |   |      |   |      |
|                                         | Need for regular supplies, and the number and types of different supplies needed. Ease of acquisition.                                                                             | No requirements for regular supplies.                                                                                                                                                                                                               | NA                                   |              |                 |                          |   |      |   |      |
| <b>Equipment</b>                        | High-technology equipment and infrastructure needed. Ease of acquisition. Number of different types of equipment needed. Maintenance needed.                                       | Different types of posters are be needed for different target groups, e.g. diabetics, the elderly, carers of young children.                                                                                                                        | 5                                    | 55.6         | 3               | 33.3                     | 1 | 11.1 | 0 | 0    |
|                                         |                                                                                                                                                                                    | High technological equipment not required.                                                                                                                                                                                                          | NA                                   |              |                 |                          |   |      |   |      |
| <b>Delivery characteristics</b>         | Retail sector, Outreach services, First-level care, Hospital care                                                                                                                  | Low maintenance.                                                                                                                                                                                                                                    | 5                                    | 55.6         | 4               | 44.4                     | 0 | 0    | 0 | 0    |
|                                         |                                                                                                                                                                                    | Health promotion materials relatively easy to acquire.                                                                                                                                                                                              | 6                                    | 66.7         | 3               | 33.3                     | 0 | 0    | 0 | 0    |
| <b>Facilities</b>                       | Skill level required for service provision                                                                                                                                         | Should be delivered in the community through outreach services for diabetics, carers of young children during maternal and child health activities.                                                                                                 | 4                                    | 44.4         | 5               | 55.6                     | 0 | 0    | 0 | 0    |
|                                         |                                                                                                                                                                                    | Should be delivered to specific groups that attend the primary health facility e.g. people over 40 years,                                                                                                                                           | 3                                    | 33.3         | 2               | 22.2                     | 3 | 33.3 | 1 | 11.1 |
|                                         |                                                                                                                                                                                    | Should be delivered to specific people that attend the primary health facility e.g. people over 40 years,                                                                                                                                           | 7                                    | 77.8         | 1               | 11.1                     | 1 | 11.1 | 0 | 0    |
|                                         | Human resources                                                                                                                                                                    | Will require knowledge about community, eye diseases and where to access care.                                                                                                                                                                      | 7                                    | 77.8         | 2               | 22.2                     | 0 | 0    | 0 | 0    |
|                                         |                                                                                                                                                                                    | Village Health Workers who live in the community should be trained to deliver health promotion in the communities.                                                                                                                                  | 6                                    | 66.7         | 3               | 33.3                     | 0 | 0    | 0 | 0    |
| <b>Communication and transport</b>      | Dependence of delivery on communication and transport infrastructure: roads, telephones, need for substantial exchange of information between different sectors or levels of care. | Facility based workers should deliver health prevention to groups/individuals in the facility.                                                                                                                                                      | 5                                    | 55.6         | 4               | 44.4                     | 0 | 0    | 0 | 0    |
|                                         |                                                                                                                                                                                    | Development of the health promotion materials and staff training will require professional instruction.                                                                                                                                             | 9                                    | 100          | 0               | 0                        | 0 | 0    | 0 | 0    |
|                                         |                                                                                                                                                                                    | Skill level required for staff supervision. Degree of supervision required.                                                                                                                                                                         | 7                                    | 77.8         | 2               | 22.2                     | 0 | 0    | 0 | 0    |
|                                         |                                                                                                                                                                                    | Intensity of professional services in terms of frequency or duration e.g. on schedule/periodic or continuous to schedule.                                                                                                                           | 7                                    | 77.8         | 2               | 22.2                     | 0 | 0    | 0 | 0    |
|                                         |                                                                                                                                                                                    | Need for managerial staff: Management and planning requirements.                                                                                                                                                                                    | 5                                    | 55.6         | 4               | 44.4                     | 0 | 0    | 0 | 0    |
| <b>Government capacity requirements</b> | Need for legislation/regulation, monitoring regulatory measures. Need for enforcement of regulation.                                                                               | Local transport infrastructure will be needed to visit communities.                                                                                                                                                                                 | 6                                    | 66.7         | 1               | 11.1                     | 2 | 22.2 | 0 | 0    |
|                                         |                                                                                                                                                                                    | Communication between the communities and the Front Line Health Facilities required.                                                                                                                                                                | 8                                    | 88.9         | 1               | 11.1                     | 0 | 0    | 0 | 0    |
|                                         |                                                                                                                                                                                    | Communication in local language required.                                                                                                                                                                                                           | 9                                    | 100          | 0               | 0                        | 0 | 0    | 0 | 0    |
| <b>Regulation/legislation</b>           | Need for sophisticated management systems. Need for managerial staff. Level of management and planning requirements.                                                               | Health promotion materials which have been approved and endorsed by local regulatory authorities.                                                                                                                                                   | 5                                    | 55.6         | 3               | 33.3                     | 1 | 11.1 | 0 | 0    |
|                                         |                                                                                                                                                                                    | Eye health promotion activities that are recorded and monitored.                                                                                                                                                                                    | 4                                    | 44.4         | 3               | 33.3                     | 1 | 11.1 | 0 | 0    |
|                                         |                                                                                                                                                                                    | A national prevention of blindness strategy will be ideal as is advocated in the Global Action Plan.                                                                                                                                                | 8                                    | 88.9         | 0               | 0                        | 1 | 11.1 | 0 | 0    |
| <b>Management systems</b>               | Need for inter-sectoral action within government. Need for partnership between government and civil society. Need for partnership between government and external funding agencies | No need for sophisticated management systems.                                                                                                                                                                                                       | NA                                   |              |                 |                          |   |      |   |      |
|                                         |                                                                                                                                                                                    | Health Promotion logistics should be managed by managerial structure at frontline health facilities.                                                                                                                                                | 4                                    | 44.4         | 3               | 33.3                     | 1 | 11.1 | 1 | 11.1 |
| <b>Collaborative action</b>             | Need to prevent resale/counterfeiting                                                                                                                                              | There is need for intersectoral action within government in trachoma endemic areas to implement water sanitation and hygiene programmes.                                                                                                            | 6                                    | 66.7         | 3               | 33.3                     | 0 | 0    | 0 | 0    |
|                                         |                                                                                                                                                                                    | Eye health promotion could be effectively done in schools.                                                                                                                                                                                          | 3                                    | 33.3         | 4               | 44.4                     | 1 | 11.1 | 1 | 11.1 |
| <b>Usage characteristics</b>            | Need for information and education                                                                                                                                                 | Health Promotion will require collaboration with NGOs.                                                                                                                                                                                              | 1                                    | 11.1         | 6               | 66.7                     | 2 | 22.2 | 0 | 0    |
|                                         |                                                                                                                                                                                    | Collaboration between communities and Front Line Health Facilities is required.                                                                                                                                                                     | 7                                    | 77.8         | 2               | 22.2                     | 0 | 0    | 0 | 0    |
| <b>Ease of use</b>                      | Need for supervision                                                                                                                                                               | Information and education of the target population in the community is necessary.                                                                                                                                                                   | 8                                    | 88.9         | 1               | 11.1                     | 0 | 0    | 0 | 0    |
|                                         |                                                                                                                                                                                    | Supervision of the Village Health Workers is important.                                                                                                                                                                                             | 8                                    | 88.9         | 1               | 11.1                     | 0 | 0    | 0 | 0    |
| <b>Pre-existing demand</b>              | Need for promotion                                                                                                                                                                 | The burden of ocular morbidity/BL/VI has been established in many setting in LMICs, but the demand for eye care services is low. Significant level of health promotion needed.                                                                      | 8                                    | 88.9         | 1               | 11.1                     | 0 | 0    | 0 | 0    |
|                                         |                                                                                                                                                                                    | In some communities, itinerant couchers and traditional healers may compete with orthodox eye care practitioners for the patients. Need to limit harmful practices of traditional eye healers by engaging them in eye health prevention activities. | 7                                    | 77.8         | 2               | 22.2                     | 0 | 0    | 0 | 0    |
| <b>Black market risk</b>                |                                                                                                                                                                                    |                                                                                                                                                                                                                                                     |                                      |              |                 |                          |   |      |   |      |



## Delphi Round 2 Facility Case Management

## Technical Capacity for facility-based intervention

| Category                                                                    | Criteria                                                                                                                                   | Technical Complexity (elements that need to be addressed)                                                                                                                     | Technical Capacities (elements that need to be assessed)                               |       |       |      |          |      |                   |      |   |
|-----------------------------------------------------------------------------|--------------------------------------------------------------------------------------------------------------------------------------------|-------------------------------------------------------------------------------------------------------------------------------------------------------------------------------|----------------------------------------------------------------------------------------|-------|-------|------|----------|------|-------------------|------|---|
|                                                                             |                                                                                                                                            |                                                                                                                                                                               | Strongly Agree                                                                         |       | Agree |      | Disagree |      | Strongly disagree |      |   |
|                                                                             |                                                                                                                                            |                                                                                                                                                                               | n                                                                                      | %     | n     | %    | n        | %    | n                 | %    |   |
| Intervention characteristics                                                |                                                                                                                                            | Batteries for torches are not stable in hot climates. Will require frequent replacement.                                                                                      | 6                                                                                      | 66.67 | 3     | 33.3 | 0        | 0    | 0                 | 0    |   |
|                                                                             |                                                                                                                                            |                                                                                                                                                                               | 8                                                                                      | 88.89 | 1     | 11.1 | 0        | 0    | 0                 | 0    |   |
|                                                                             |                                                                                                                                            | Eye drops will require cool storage.                                                                                                                                          | 5                                                                                      | 55.56 | 3     | 33.3 | 0        | 0    | 0                 | 0    |   |
|                                                                             | Stability/ease of storage/ease of transport                                                                                                | Tetanus toxoid will require cold storage (refrigeration)                                                                                                                      | 6                                                                                      | 66.67 | 2     | 22.2 | 0        | 0    | 0                 | 0    |   |
|                                                                             |                                                                                                                                            | Topical antibiotic ointment does not need cold storage                                                                                                                        | 6                                                                                      | 66.67 | 2     | 22.2 | 0        | 0    | 0                 | 0    |   |
| Basic product design                                                        |                                                                                                                                            | Injectable antibiotics for ophthalmia neonatorum will require cold storage                                                                                                    | 4                                                                                      | 44.44 | 3     | 33.3 | 1        | 11.1 | 0                 | 0    |   |
|                                                                             |                                                                                                                                            | Sterile saline solution for eye irrigation is needed and is stable                                                                                                            | 4                                                                                      | 44.44 | 3     | 33.3 | 1        | 11.1 | 0                 | 0    |   |
|                                                                             |                                                                                                                                            | High dose vitamin A is needed and is stable                                                                                                                                   | 5                                                                                      | 55.56 | 4     | 44.4 | 0        | 0    | 0                 | 0    |   |
|                                                                             | Standardizability                                                                                                                          | All the above consummables will be transported by pre existing PHC transport channels                                                                                         | 7                                                                                      | 77.78 | 2     | 22.2 | 0        | 0    | 0                 | 0    |   |
|                                                                             |                                                                                                                                            | The WHO AFROC PEC package as 5 algorithms for facility-based care with 12 protocols and 7 standards. Hence the intervention is standardized.                                  | 6                                                                                      | 66.67 | 3     | 33.3 | 0        | 0    | 0                 | 0    |   |
| Safety profile                                                              | None of the products cause any harm, if delivered correctly                                                                                | 8                                                                                                                                                                             | 88.89                                                                                  | 1     | 11.1  | 0    | 0        | 0    | 0                 |      |   |
| Supplies                                                                    | Need for regular supplies                                                                                                                  | Regular supplies of eye medication are needed.                                                                                                                                | 8                                                                                      | 88.89 | 1     | 11.1 | 0        | 0    | 0                 | 0    |   |
|                                                                             | High-technology equipment and infrastructure needed                                                                                        | Diagnostic equipment needed: Snellen distance visual acuity chart; near visual acuity chart, torches and batteries.                                                           | 7                                                                                      | 77.78 | 2     | 22.2 | 0        | 0    | 0                 | 0    |   |
| Equipment                                                                   |                                                                                                                                            | Infrastructure: 6m distance to measure visual acuity.                                                                                                                         | 6                                                                                      | 66.67 | 2     | 22.2 | 0        | 0    | 0                 | 0    |   |
|                                                                             |                                                                                                                                            | Space for counselling required.                                                                                                                                               | 8                                                                                      | 88.89 | 1     | 11.1 | 0        | 0    | 0                 | 0    |   |
|                                                                             | Number of different types of equipment needed                                                                                              | One set of diagnostic equipment per facility is needed                                                                                                                        | 6                                                                                      | 66.67 | 2     | 22.2 | 1        | 11.1 | 0                 | 0    |   |
| Maintenance needed                                                          | Torch batteries will need to be changed.                                                                                                   | 5                                                                                                                                                                             | 55.56                                                                                  | 4     | 44.4  | 0    | 0        | 0    | 0                 |      |   |
| Delivery characteristics                                                    |                                                                                                                                            |                                                                                                                                                                               |                                                                                        |       |       |      |          |      |                   |      |   |
|                                                                             | First-level care                                                                                                                           | Diagnoses of management of uncomplicated cases can be delivered in Primary Health Centres and Health Posts.                                                                   | 6                                                                                      | 66.67 | 3     | 33.3 | 0        | 0    | 0                 | 0    |   |
|                                                                             | Hospital care                                                                                                                              | Hospital services are needed for referrals, severe cases and treatment failures, further investigations and management, as required.                                          | 8                                                                                      | 88.89 | 1     | 11.1 | 0        | 0    | 0                 | 0    |   |
|                                                                             | Skill level required for service provision                                                                                                 | Mid-level skill is required to make a diagnosis (eliciting a history; measuring visual acuity; basic eye examination)                                                         | 8                                                                                      | 88.89 | 1     | 11.1 | 0        | 0    | 0                 | 0    |   |
|                                                                             |                                                                                                                                            | Mid-level skill is required for management of some conditions e.g., eye irrigation; removal of foreign bodies; giving intramuscular injections (tetanus toxoid; antibiotics)  | 8                                                                                      | 88.89 | 1     | 11.1 | 0        | 0    | 0                 | 0    |   |
| Skill level required for staff supervision. Degree of supervision required. | Mid-level skill is required for identifying which cases to refer and the level of urgency                                                  | 8                                                                                                                                                                             | 88.89                                                                                  | 1     | 11.1  | 0    | 0        | 0    | 0                 |      |   |
| Human resources                                                             |                                                                                                                                            | Primary Health Care supervisors need a good level of knowledge of eye conditions and their management and be skilled in the above. activity needed.                           | 6                                                                                      | 66.67 | 3     | 33.3 | 0        | 0    | 0                 | 0    |   |
|                                                                             |                                                                                                                                            | Regular supervision of PEC required.                                                                                                                                          | 6                                                                                      | 66.67 | 3     | 33.3 | 0        | 0    | 0                 | 0    |   |
|                                                                             | Intensity of professional services in terms of frequency or duration. e.g. on schedule /periodic or continuous to accommodate emergencies. | Primary Health Care workers trained in eye care should be available continuously to manage emergencies                                                                        | 8                                                                                      | 88.89 | 1     | 11.1 | 0        | 0    | 0                 | 0    |   |
|                                                                             | Management and planning requirements. Need for managerial staff                                                                            | Managerial staff needed to manage supplies of consumables and plan purchasing                                                                                                 | 6                                                                                      | 66.67 | 3     | 33.3 | 0        | 0    | 0                 | 0    |   |
|                                                                             |                                                                                                                                            | Managerial staff needed to establish and maintain referral and feedback mechanisms between the PH centre and eye department/clinic.                                           | 5                                                                                      | 55.56 | 2     | 22.2 | 1        | 11.1 | 0                 | 0    |   |
| Communication and Transport                                                 | Depends on delivery of communication and transport infrastructure                                                                          | Managerial systems to coordinate staff rotations to ensure daily facility coverage by trained PEC staff.                                                                      | 7                                                                                      | 77.78 | 2     | 22.2 | 0        | 0    | 0                 | 0    |   |
|                                                                             |                                                                                                                                            | Depends on communication to establish and maintain referral and feedback mechanisms between PH centres and eye department/clinic. Respond to feedback from referrals.         | 6                                                                                      | 66.67 | 3     | 33.3 | 0        | 0    | 0                 | 0    |   |
|                                                                             |                                                                                                                                            | Transportation between PH Centre and referral centre imperative.                                                                                                              | 3                                                                                      | 33.33 | 4     | 44.4 | 1        | 11.1 | 0                 | 0    |   |
| Government capacity requirements                                            |                                                                                                                                            |                                                                                                                                                                               |                                                                                        |       |       |      |          |      |                   |      |   |
|                                                                             | Need for regulation.                                                                                                                       | Appropriate medication & equipment need to be on the national essential drug list to facilitate availability.                                                                 | 6                                                                                      | 66.67 | 2     | 22.2 | 0        | 0    | 0                 | 0    |   |
|                                                                             | Regulation/legislation                                                                                                                     | Need for monitoring regulatory measures. Need for enforcement of regulation.                                                                                                  | There is need for regulation of drug prescription and dispensing by appropriate staff. | 7     | 77.78 | 2    | 22.2     | 0    | 0                 | 0    | 0 |
|                                                                             |                                                                                                                                            | Measles is a notifiable condition and should be reported to appropriate regulatory authorities.                                                                               | 9                                                                                      | 100   | 0     | 0    | 0        | 0    | 0                 | 0    |   |
|                                                                             | Management systems                                                                                                                         | Need for sophisticated management systems                                                                                                                                     | Ophthalmia neonatorum is a notifiable condition and should be reported                 | 7     | 77.78 | 2    | 22.2     | 0    | 0                 | 0    | 0 |
| No need for sophisticated management systems                                |                                                                                                                                            |                                                                                                                                                                               | 7                                                                                      | 77.78 | 2     | 22.2 | 0        | 0    | 0                 | 0    |   |
| Collaborative action                                                        | Need for inter-sectoral action within government. Need for partnership between government and civil society.                               | Intersectoral action withingovernment or partnerships between government and civil society are desirable but not mandatory.                                                   | 6                                                                                      | 66.67 | 3     | 33.3 | 0        | 0    | 0                 | 0    |   |
|                                                                             |                                                                                                                                            | Need for partnership between government and external funding agencies                                                                                                         | Need for partnerships between governments and NGOs.                                    | 0     | 0     | 5    | 55.6     | 4    | 44.4              | 0    | 0 |
| Usage characteristics                                                       | Need for supervision                                                                                                                       | NGOs are responsible for the bulk of eye care in LMICs.                                                                                                                       | 1                                                                                      | 11.11 | 5     | 55.6 | 2        | 22.2 | 1                 | 11.1 |   |
|                                                                             |                                                                                                                                            | Outcomes of consultation at the PH Centre will be reassurance, treatment (and) or referral. At this level, prescribed treatments may not require supervision at home.         | 5                                                                                      | 55.56 | 2     | 22.2 | 2        | 22.2 | 0                 | 0    |   |
|                                                                             |                                                                                                                                            | Referrals to secondary centres may require supervision to ensure compliance and may have to be supported.                                                                     | 4                                                                                      | 44.44 | 4     | 44.4 | 1        | 11.1 | 0                 | 0    |   |
| Pre-existing demand                                                         | Need for promotion                                                                                                                         | The burden of ocular morbidity(BLVI) has been established in many setting in LMICs but the demand for eye care services is low. Significant level of health promotion needed. | 4                                                                                      | 44.44 | 4     | 44.4 | 1        | 11.1 | 0                 | 0    |   |
| Black market risk                                                           | Need to prevent resale/counterfeiting                                                                                                      | Need to limit harmful practices of traditional eye healers by training them to identify and refer eye conditions.                                                             | 6                                                                                      | 66.67 | 2     | 22.2 | 1        | 11.1 | 0                 | 0    |   |

# Reporting checklist for quality improvement study.

Based on the SQUIRE guidelines.

## Instructions to authors

Complete this checklist by entering the page numbers from your manuscript where readers will find each of the items listed below.

Your article may not currently address all the items on the checklist. Please modify your text to include the missing information. If you are certain that an item does not apply, please write "n/a" and provide a short explanation.

Upload your completed checklist as an extra file when you submit to a journal.

In your methods section, say that you used the SQUIRE reporting guidelines, and cite them as:

Ogrinc G, Davies L, Goodman D, Batalden P, Davidoff F, Stevens D. SQUIRE 2.0 (Standards for Quality Improvement Reporting Excellence): revised publication guidelines from a detailed consensus process

|                    | Reporting Item                                                                                                                                                                                                         | Page Number |
|--------------------|------------------------------------------------------------------------------------------------------------------------------------------------------------------------------------------------------------------------|-------------|
| <b>Title</b>       |                                                                                                                                                                                                                        |             |
| <a href="#">#1</a> | Indicate that the manuscript concerns an initiative to improve healthcare (broadly defined to include the quality, safety, effectiveness, patientcenteredness, timeliness, cost, efficiency, and equity of healthcare) | 1           |

|    |                     |                                                                     |       |
|----|---------------------|---------------------------------------------------------------------|-------|
| 1  | <b>Abstract</b>     |                                                                     |       |
| 2  |                     |                                                                     |       |
| 3  |                     |                                                                     |       |
| 4  |                     | <a href="#">#02a</a>                                                | 2     |
| 5  |                     | Provide adequate information to aid in searching and indexing       |       |
| 6  |                     |                                                                     |       |
| 7  |                     | <a href="#">#02b</a>                                                | 2     |
| 8  |                     | Summarize all key information from various sections of the          |       |
| 9  |                     | text using the abstract format of the intended publication or a     |       |
| 10 |                     | structured summary such as: background, local problem,              |       |
| 11 |                     | methods, interventions, results, conclusions                        |       |
| 12 |                     |                                                                     |       |
| 13 |                     |                                                                     |       |
| 14 |                     |                                                                     |       |
| 15 |                     |                                                                     |       |
| 16 |                     |                                                                     |       |
| 17 | <b>Introduction</b> |                                                                     |       |
| 18 |                     |                                                                     |       |
| 19 |                     |                                                                     |       |
| 20 | Problem             | <a href="#">#3</a>                                                  | 3     |
| 21 |                     | Nature and significance of the local problem                        |       |
| 22 |                     |                                                                     |       |
| 23 | description         |                                                                     |       |
| 24 |                     |                                                                     |       |
| 25 |                     |                                                                     |       |
| 26 | Available           | <a href="#">#4</a>                                                  | 3     |
| 27 |                     | Summary of what is currently known about the problem,               |       |
| 28 | knowledge           |                                                                     |       |
| 29 |                     | including relevant previous studies                                 |       |
| 30 |                     |                                                                     |       |
| 31 | Rationale           | <a href="#">#5</a>                                                  | 3     |
| 32 |                     | Informal or formal frameworks, models, concepts, and / or           |       |
| 33 |                     | theories used to explain the problem, any reasons or                |       |
| 34 |                     | assumptions that were used to develop the intervention(s),          |       |
| 35 |                     | and reasons why the intervention(s) was expected to work            |       |
| 36 |                     |                                                                     |       |
| 37 |                     |                                                                     |       |
| 38 |                     |                                                                     |       |
| 39 |                     |                                                                     |       |
| 40 |                     |                                                                     |       |
| 41 | Specific aims       | <a href="#">#6</a>                                                  | 4     |
| 42 |                     | Purpose of the project and of this report                           |       |
| 43 |                     |                                                                     |       |
| 44 | <b>Methods</b>      |                                                                     |       |
| 45 |                     |                                                                     |       |
| 46 |                     |                                                                     |       |
| 47 | Context             | <a href="#">#7</a>                                                  | 4     |
| 48 |                     | Contextual elements considered important at the outset of           |       |
| 49 |                     | introducing the intervention(s)                                     |       |
| 50 |                     |                                                                     |       |
| 51 |                     |                                                                     |       |
| 52 | Intervention(s)     | <a href="#">#08a</a>                                                | 4-6   |
| 53 |                     | Description of the intervention(s) in sufficient detail that others |       |
| 54 |                     | could reproduce it                                                  |       |
| 55 |                     |                                                                     |       |
| 56 |                     |                                                                     |       |
| 57 |                     |                                                                     |       |
| 58 | Intervention(s)     | <a href="#">#08b</a>                                                | 4,6,8 |
| 59 |                     | Specifics of the team involved in the work                          |       |
| 60 |                     |                                                                     |       |

|    |                 |                      |                                                                   |       |
|----|-----------------|----------------------|-------------------------------------------------------------------|-------|
| 1  | Study of the    | <a href="#">#09a</a> | Approach chosen for assessing the impact of the                   | 'n/a' |
| 2  |                 |                      |                                                                   |       |
| 3  | Intervention(s) |                      | intervention(s)                                                   |       |
| 4  |                 |                      |                                                                   |       |
| 5  |                 |                      |                                                                   |       |
| 6  | Study of the    | <a href="#">#09b</a> | Approach used to establish whether the observed outcomes          | 'n/a' |
| 7  |                 |                      |                                                                   |       |
| 8  | Intervention(s) |                      | were due to the intervention(s)                                   |       |
| 9  |                 |                      |                                                                   |       |
| 10 |                 |                      |                                                                   |       |
| 11 | Measures        | <a href="#">#10a</a> | Measures chosen for studying processes and outcomes of the        | 4     |
| 12 |                 |                      |                                                                   |       |
| 13 |                 |                      | intervention(s), including rationale for choosing them, their     |       |
| 14 |                 |                      |                                                                   |       |
| 15 |                 |                      | operational definitions, and their validity and reliability       |       |
| 16 |                 |                      |                                                                   |       |
| 17 | Measures        | <a href="#">#10b</a> | Description of the approach to the ongoing assessment of          | 5-6   |
| 18 |                 |                      |                                                                   |       |
| 19 |                 |                      | contextual elements that contributed to the success, failure,     |       |
| 20 |                 |                      |                                                                   |       |
| 21 |                 |                      | efficiency, and cost                                              |       |
| 22 |                 |                      |                                                                   |       |
| 23 |                 |                      |                                                                   |       |
| 24 |                 |                      |                                                                   |       |
| 25 | Measures        | <a href="#">#10c</a> | Methods employed for assessing completeness and accuracy          | 7     |
| 26 |                 |                      |                                                                   |       |
| 27 |                 |                      | of data                                                           |       |
| 28 |                 |                      |                                                                   |       |
| 29 |                 |                      |                                                                   |       |
| 30 | Analysis        | <a href="#">#11a</a> | Qualitative and quantitative methods used to draw inferences      | 7     |
| 31 |                 |                      |                                                                   |       |
| 32 |                 |                      | from the data                                                     |       |
| 33 |                 |                      |                                                                   |       |
| 34 |                 |                      |                                                                   |       |
| 35 | Analysis        | <a href="#">#11b</a> | Methods for understanding variation within the data, including    | 'n/a' |
| 36 |                 |                      |                                                                   |       |
| 37 |                 |                      | the effects of time as a variable                                 |       |
| 38 |                 |                      |                                                                   |       |
| 39 |                 |                      |                                                                   |       |
| 40 | Ethical         | <a href="#">#12</a>  | Ethical aspects of implementing and studying the                  | 4, 22 |
| 41 |                 |                      |                                                                   |       |
| 42 | considerations  |                      | intervention(s) and how they were addressed, including, but       |       |
| 43 |                 |                      |                                                                   |       |
| 44 |                 |                      | not limited to, formal ethics review and potential conflict(s) of |       |
| 45 |                 |                      |                                                                   |       |
| 46 |                 |                      | interest                                                          |       |
| 47 |                 |                      |                                                                   |       |
| 48 |                 |                      |                                                                   |       |
| 49 |                 |                      |                                                                   |       |
| 50 |                 |                      |                                                                   |       |
| 51 |                 |                      |                                                                   |       |
| 52 |                 |                      |                                                                   |       |
| 53 | <b>Results</b>  |                      |                                                                   |       |
| 54 |                 |                      |                                                                   |       |
| 55 |                 |                      |                                                                   |       |
| 56 |                 |                      |                                                                   |       |
| 57 |                 |                      |                                                                   |       |
| 58 |                 |                      |                                                                   |       |
| 59 |                 |                      |                                                                   |       |
| 60 |                 |                      |                                                                   |       |

|    |                   |                      |                                                                    |
|----|-------------------|----------------------|--------------------------------------------------------------------|
| 1  |                   |                      |                                                                    |
| 2  |                   | <a href="#">#13a</a> | Initial steps of the intervention(s) and their evolution over time |
| 3  |                   |                      |                                                                    |
| 4  |                   |                      | (e.g., time-line diagram, flow chart, or table), including         |
| 5  |                   |                      | modifications made to the intervention during the project          |
| 6  |                   |                      |                                                                    |
| 7  |                   |                      |                                                                    |
| 8  |                   |                      |                                                                    |
| 9  |                   | <a href="#">#13b</a> | Details of the process measures and outcome                        |
| 10 |                   |                      |                                                                    |
| 11 |                   |                      |                                                                    |
| 12 |                   | <a href="#">#13c</a> | Contextual elements that interacted with the intervention(s)       |
| 13 |                   |                      |                                                                    |
| 14 |                   |                      |                                                                    |
| 15 |                   | <a href="#">#13d</a> | Observed associations between outcomes, interventions, and         |
| 16 |                   |                      | relevant contextual elements                                       |
| 17 |                   |                      |                                                                    |
| 18 |                   |                      |                                                                    |
| 19 |                   |                      |                                                                    |
| 20 |                   | <a href="#">#13e</a> | Unintended consequences such as unexpected benefits,               |
| 21 |                   |                      | problems, failures, or costs associated with the                   |
| 22 |                   |                      | intervention(s).                                                   |
| 23 |                   |                      |                                                                    |
| 24 |                   |                      |                                                                    |
| 25 |                   |                      |                                                                    |
| 26 |                   |                      |                                                                    |
| 27 |                   |                      |                                                                    |
| 28 |                   | <a href="#">#13f</a> | Details about missing data                                         |
| 29 |                   |                      |                                                                    |
| 30 |                   |                      |                                                                    |
| 31 | <b>Discussion</b> |                      |                                                                    |
| 32 |                   |                      |                                                                    |
| 33 |                   |                      |                                                                    |
| 34 | Summary           | <a href="#">#14a</a> | Key findings, including relevance to the rationale and specific    |
| 35 |                   |                      | aims                                                               |
| 36 |                   |                      |                                                                    |
| 37 |                   |                      |                                                                    |
| 38 |                   |                      |                                                                    |
| 39 | Summary           | <a href="#">#14b</a> | Particular strengths of the project                                |
| 40 |                   |                      |                                                                    |
| 41 |                   |                      |                                                                    |
| 42 | Interpretation    | <a href="#">#15a</a> | Nature of the association between the intervention(s) and the      |
| 43 |                   |                      | outcomes                                                           |
| 44 |                   |                      |                                                                    |
| 45 |                   |                      |                                                                    |
| 46 |                   |                      |                                                                    |
| 47 |                   |                      |                                                                    |
| 48 | Interpretation    | <a href="#">#15b</a> | Comparison of results with findings from other publications        |
| 49 |                   |                      |                                                                    |
| 50 |                   |                      |                                                                    |
| 51 | Interpretation    | <a href="#">#15c</a> | Impact of the project on people and systems                        |
| 52 |                   |                      |                                                                    |
| 53 |                   |                      |                                                                    |
| 54 | Interpretation    | <a href="#">#15d</a> | Reasons for any differences between observed and                   |
| 55 |                   |                      | anticipated outcomes, including the influence of context           |
| 56 |                   |                      |                                                                    |
| 57 |                   |                      |                                                                    |
| 58 |                   |                      |                                                                    |
| 59 |                   |                      |                                                                    |
| 60 |                   |                      |                                                                    |

|    |                    |                      |                                                               |       |
|----|--------------------|----------------------|---------------------------------------------------------------|-------|
| 1  | Interpretation     | <a href="#">#15e</a> | Costs and strategic trade-offs, including opportunity costs   | 'n/a' |
| 2  |                    |                      |                                                               |       |
| 3  |                    |                      |                                                               |       |
| 4  | Limitations        | <a href="#">#16a</a> | Limits to the generalizability of the work                    | 21    |
| 5  |                    |                      |                                                               |       |
| 6  |                    |                      |                                                               |       |
| 7  | Limitations        | <a href="#">#16b</a> | Factors that might have limited internal validity such as     | 21    |
| 8  |                    |                      | confounding, bias, or imprecision in the design, methods,     |       |
| 9  |                    |                      | measurement, or analysis                                      |       |
| 10 |                    |                      |                                                               |       |
| 11 |                    |                      |                                                               |       |
| 12 |                    |                      |                                                               |       |
| 13 |                    |                      |                                                               |       |
| 14 |                    |                      |                                                               |       |
| 15 | Limitations        | <a href="#">#16c</a> | Efforts made to minimize and adjust for limitations           | 21    |
| 16 |                    |                      |                                                               |       |
| 17 |                    |                      |                                                               |       |
| 18 | Conclusion         | <a href="#">#17a</a> | Usefulness of the work                                        | 21    |
| 19 |                    |                      |                                                               |       |
| 20 |                    |                      |                                                               |       |
| 21 | Conclusion         | <a href="#">#17b</a> | Sustainability                                                | 20    |
| 22 |                    |                      |                                                               |       |
| 23 |                    |                      |                                                               |       |
| 24 | Conclusion         | <a href="#">#17c</a> | Potential for spread to other contexts                        | 20    |
| 25 |                    |                      |                                                               |       |
| 26 |                    |                      |                                                               |       |
| 27 | Conclusion         | <a href="#">#17d</a> | Implications for practice and for further study in the field  | 20    |
| 28 |                    |                      |                                                               |       |
| 29 |                    |                      |                                                               |       |
| 30 | Conclusion         | <a href="#">#17e</a> | Suggested next steps                                          | 21    |
| 31 |                    |                      |                                                               |       |
| 32 |                    |                      |                                                               |       |
| 33 | <b>Other</b>       |                      |                                                               |       |
| 34 |                    |                      |                                                               |       |
| 35 |                    |                      |                                                               |       |
| 36 | <b>information</b> |                      |                                                               |       |
| 37 |                    |                      |                                                               |       |
| 38 |                    |                      |                                                               |       |
| 39 | Funding            | <a href="#">#18</a>  | Sources of funding that supported this work. Role, if any, of | 22    |
| 40 |                    |                      | the funding organization in the design, implementation,       |       |
| 41 |                    |                      | interpretation, and reporting                                 |       |
| 42 |                    |                      |                                                               |       |
| 43 |                    |                      |                                                               |       |
| 44 |                    |                      |                                                               |       |
| 45 |                    |                      |                                                               |       |
| 46 |                    |                      |                                                               |       |

The SQUIRE 2.0 checklist is distributed under the terms of the Creative Commons Attribution License CC BY-NC 4.0. This checklist was completed on 18. July 2020 using <https://www.goodreports.org/>, a tool made by the [EQUATOR Network](#) in collaboration with [Penelope.ai](#)

# BMJ Open

## Technical capacities needed to implement the World Health Organization's primary eye care package for Africa: results of a Delphi process

|                                 |                                                                                                                                                                                                                                                                                                                                                                                                                                                                                                                                                                                                                                                                                                                                                                                                                                                                                                                                                                    |
|---------------------------------|--------------------------------------------------------------------------------------------------------------------------------------------------------------------------------------------------------------------------------------------------------------------------------------------------------------------------------------------------------------------------------------------------------------------------------------------------------------------------------------------------------------------------------------------------------------------------------------------------------------------------------------------------------------------------------------------------------------------------------------------------------------------------------------------------------------------------------------------------------------------------------------------------------------------------------------------------------------------|
| Journal:                        | <i>BMJ Open</i>                                                                                                                                                                                                                                                                                                                                                                                                                                                                                                                                                                                                                                                                                                                                                                                                                                                                                                                                                    |
| Manuscript ID                   | bmjopen-2020-042979.R1                                                                                                                                                                                                                                                                                                                                                                                                                                                                                                                                                                                                                                                                                                                                                                                                                                                                                                                                             |
| Article Type:                   | Original research                                                                                                                                                                                                                                                                                                                                                                                                                                                                                                                                                                                                                                                                                                                                                                                                                                                                                                                                                  |
| Date Submitted by the Author:   | 18-Feb-2021                                                                                                                                                                                                                                                                                                                                                                                                                                                                                                                                                                                                                                                                                                                                                                                                                                                                                                                                                        |
| Complete List of Authors:       | Aghaji, Ada; London School of Hygiene & Tropical Medicine, International Centre for Eye Health; University of Nigeria Faculty of Medical Sciences, Department of Ophthalmology<br>Burchett, Helen; London School of Hygiene and Tropical Medicine Faculty of Public Health and Policy, Global Health and Development<br>Mathenge, Wanjiku<br>Faal, Hannah; African Vision Research Institute; University of Calabar, Ophthalmology<br>Umeh, Rich; University of Nigeria Faculty of Medical Sciences, Department of Ophthalmology<br>Ezepue, Felix; University of Nigeria Faculty of Medical Sciences, Department of Ophthalmology<br>Isiyaku, Sunday; Sight Savers International<br>Kyari, Fatima; Baze University, Department of Ophthalmology<br>Wiafe, Boateng<br>Foster, Allen; London School of Hygiene & Tropical Medicine, International Centre for Eye Health<br>Gilbert, Clare; London School of Hygiene & Tropical Medicine, Clinical Research Unit, ITD |
| <b>Primary Subject Heading</b>: | Ophthalmology                                                                                                                                                                                                                                                                                                                                                                                                                                                                                                                                                                                                                                                                                                                                                                                                                                                                                                                                                      |
| Secondary Subject Heading:      | Health policy, Ophthalmology, Public health                                                                                                                                                                                                                                                                                                                                                                                                                                                                                                                                                                                                                                                                                                                                                                                                                                                                                                                        |
| Keywords:                       | PUBLIC HEALTH, OPHTHALMOLOGY, Protocols & guidelines < HEALTH SERVICES ADMINISTRATION & MANAGEMENT                                                                                                                                                                                                                                                                                                                                                                                                                                                                                                                                                                                                                                                                                                                                                                                                                                                                 |
|                                 |                                                                                                                                                                                                                                                                                                                                                                                                                                                                                                                                                                                                                                                                                                                                                                                                                                                                                                                                                                    |

SCHOLARONE™  
Manuscripts

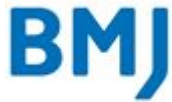

I, the Submitting Author has the right to grant and does grant on behalf of all authors of the Work (as defined in the below author licence), an exclusive licence and/or a non-exclusive licence for contributions from authors who are: i) UK Crown employees; ii) where BMJ has agreed a CC-BY licence shall apply, and/or iii) in accordance with the terms applicable for US Federal Government officers or employees acting as part of their official duties; on a worldwide, perpetual, irrevocable, royalty-free basis to BMJ Publishing Group Ltd ("BMJ") its licensees and where the relevant Journal is co-owned by BMJ to the co-owners of the Journal, to publish the Work in this journal and any other BMJ products and to exploit all rights, as set out in our [licence](#).

The Submitting Author accepts and understands that any supply made under these terms is made by BMJ to the Submitting Author unless you are acting as an employee on behalf of your employer or a postgraduate student of an affiliated institution which is paying any applicable article publishing charge ("APC") for Open Access articles. Where the Submitting Author wishes to make the Work available on an Open Access basis (and intends to pay the relevant APC), the terms of reuse of such Open Access shall be governed by a Creative Commons licence – details of these licences and which [Creative Commons](#) licence will apply to this Work are set out in our licence referred to above.

Other than as permitted in any relevant BMJ Author's Self Archiving Policies, I confirm this Work has not been accepted for publication elsewhere, is not being considered for publication elsewhere and does not duplicate material already published. I confirm all authors consent to publication of this Work and authorise the granting of this licence.



1  
2  
3 **Technical capacities needed to implement the World Health Organization's primary**  
4 **eye care package for Africa: results of a Delphi process**  
5  
6  
7

8 Aghaji, Ada <sup>1,2</sup>; Burchett, Helen <sup>3</sup>; Mathenge, Wanjiku <sup>4</sup>; Faal, Hannah <sup>5</sup>; Umeh, Rich <sup>2</sup>;  
9 Ezepue, Felix <sup>2</sup>; Isiyaku, Sunday <sup>6</sup>; Kyari, Fatima<sup>7</sup>; Wiafe, Boateng<sup>8</sup>; Foster, Allen<sup>1</sup>; Gilbert,  
10 Clare<sup>1</sup>  
11  
12  
13

- 14 1. International Centre for Eye Health, London School of Hygiene & Tropical Medicine,  
15 London, United Kingdom.
  - 16 2. Department of Ophthalmology, College of Medicine, University of Nigeria, Enugu,  
17 Nigeria.
  - 18 3. Faculty of Public Health and Policy, London School of Hygiene & Tropical Medicine,  
19 London, United Kingdom.
  - 20 4. Rwanda International Institute of Ophthalmology, Kigali, Rwanda.
  - 21 5. African Vision Research Institute, Durban, KwaZulu- Natal, South Africa.
  - 22 6. Sightsavers Country Office, Kaduna, Nigeria.
  - 23 7. Department of Ophthalmology, Baze University, Abuja, Nigeria.
  - 24 8. Operation Eyesight, Accra, Ghana.
- 25  
26  
27  
28  
29  
30  
31  
32

33 Corresponding author Aghaji Ada

34 [aaghaji@yahoo.co.uk](mailto:aaghaji@yahoo.co.uk), [ada.aghaji@unn.edu.ng](mailto:ada.aghaji@unn.edu.ng)

35 <https://orcid.org/0000-0003-1308-447X>  
36  
37  
38  
39

40 Key words; Delphi, Primary eye care, feasibility, sub-Saharan Africa, feasibility, technical  
41 capacity  
42

43 Word count 3396  
44  
45  
46  
47  
48  
49  
50  
51  
52  
53  
54  
55  
56  
57  
58  
59  
60

## Technical capacities needed to implement the World Health Organization's primary eye care package for sub-Saharan Africa: results of a Delphi process

### ABSTRACT

**Objective** The aim of the study was to establish the technical capacities needed to deliver the World Health Organization African Region's primary eye care package in primary health care facilities.

**Design** A two-round Delphi exercise was used to obtain expert consensus on the technical complexity of each component of the package and the technical capacities needed to deliver them, using Gericke's framework of technical feasibility. The panel comprised nine eyecare experts in primary eyecare in sub-Saharan Africa. In each round panel members used a 4-point Likert scale to indicate their level of agreement. Consensus was predefined as  $\geq 70\%$  agreement on each statement. For round 1, statements on technical complexity were identified through a literature search of primary eyecare in sub-Saharan Africa from January 1980 to April 2018. Statements for which consensus was achieved were included in round 2 and the technical capacities were agreed.

**Results** Technical complexity statements were classified into four broad categories: intervention characteristics, delivery characteristics, government capacity requirements and usage characteristics. 34 of the 38 (89%) statements on health promotion and 40 of the 43 (93%) statements on facility case management were considered necessary technical capacities for implementation.

**Conclusion** This study establishes the technical capacities needed to implement the WHO AFRO primary eye care package which may be generalizable to countries in Sub-Saharan Africa

### Article Summary

#### Strengths and limitations of this study

- This is the first study to establish the technical capacities needed to implement primary eye care in sub-Saharan Africa.
- A recognised technical feasibility framework was used, and statements were derived from a literature review of primary eye care in sub-Saharan Africa.
- A Delphi exercise was used to garner expert opinion and to reach consensus.
- Our expert panel was a non-random sample, and this may have led to hidden biases as the participants may not be representative of all the experts with the pre-determined inclusion criteria.

## INTRODUCTION

### Scope of the problem

Estimates from sub-Saharan Africa (SSA) indicate that about 22 million people are blind or visually impaired, mainly from avoidable causes such as cataract and uncorrected refractive errors. In addition, over 100 million older adults in SSA are estimated to have near visual impairment.(1) The age standardised prevalence of blindness ( $\geq 50$  years) is highest of all world regions, being in 5.1% in western and 4.3% eastern sub-Saharan Africa (2), with 80% of causes being preventable or treatable. Much of the regional variation in prevalence is explained by variability in access to eye care.(3)

Although there are limited data on regional estimates for non-visually impairing conditions (NVICs) in SSA, such as allergic/infective conjunctivitis and dry eye syndrome, the prevalence of NVICs in Kenya and Nigeria are estimated to be 15% and 25%, respectively. (4, 5) These figures suggest a high need for eye care services in SSA, yet only 30% of Africans have access to eye care.(6)

### Primary Eye care in sub-Saharan Africa

The inclusion of primary eye care (PEC) in primary health care (PHC) has been recommended as a strategy to increase sustainability and access to eye care services, (7) (8) and there is global and regional support for PEC. (9) Indeed, the World Health Organisation (WHO) in their Global Action Plan 2014-2019, reiterates the importance of accessible eye care services for the effective control of blindness and visual impairment, and calls on member states to secure the inclusion of PEC within PHC.(10) However, a literature review of PEC in SSA reported many challenges to the effective implementation of PEC. These include a lack of agreement on the scope of PEC and a lack of clear guidelines on the technical eye related skills required by PHC workers; these affect the extent of training, supervision, and the type of equipment and consumables required.(11) In response to this, the WHO Africa Office (WHO AFRO) recently developed and pilot tested a package of interventions for PEC in SSA. The WHO AFRO PEC Package consists of eight elements which cover two broad areas i.e. health promotion and facility based case management.(12, 13) For health promotion the package has (two elements): 1. four sets of health messages for healthy people, people at risk of and with eye diseases, for children and carers, those aged 40 and above, people of all ages and those with diabetes and 2. instructions on how to give a health talk. For facility-based case management the package has six elements 1. five evidence-based algorithms for red eye, eye swelling, trauma, vision loss for distance and near, and children 0-5 years, 2. a set of 12 evidence-based protocols covering five topics: how to measure visual acuity (VA), how to cover an eye, medication, referrals, removal of

1  
2  
3 foreign bodies), 3. a training package (curriculum and materials), 4. core lists of essential  
4 consumables, technologies and medicines, 5. a set of 10 standards and indicators for  
5 monitoring and evaluation and 6. templates to collect health information, monitoring and  
6 evaluation. Although this health initiative has the potential to increase coverage of eye health  
7 services in sub-Saharan Africa (SSA),(8) not all health initiatives proposed may be feasible  
8 to implement. Feasibility research can help identify the challenges as well as opportunities in  
9 implementing a new health initiative. This is particularly true for the WHO AFRO sub-region  
10 where there is a marked variability in the ability of the 47 member states to implement  
11 additional interventions within PHC. (14)  
12  
13  
14  
15  
16  
17  
18

19 Feasibility in relation to health initiatives is a multifaceted construct which Snowdon  
20 described as having the following components: technical, political, cultural, financial and  
21 legal feasibility; (15) the technical feasibility component was selected for this study.  
22 Technical feasibility is a balance between how complex the intervention is and the technical  
23 capacities required to implement it.(16) The WHO AFRO PEC package has many different  
24 technical components, and the overall purpose of this study was to assess the feasibility of  
25 integrating the package into PHC in SSA. In this paper we report the processes involved in  
26 developing the content of the feasibility framework for PEC for use in PHC settings in sub-  
27 Saharan African countries.  
28  
29  
30  
31  
32  
33  
34

## 35 **METHODS**

36 Our approach was framed by awareness of the limited published literature on the  
37 effectiveness of PEC in sub-Saharan Africa (11) and the need to adopt a systematic method  
38 to provide expert consensus on the feasibility of implementing PEC to guide policy makers.  
39 Against this backdrop, we used a combination of methods: literature reviews (of feasibility  
40 frameworks for public health interventions, and of PEC in SSA) and a Delphi process. The  
41 Delphi method is an iterative method of collecting opinions from a group of experts where  
42 evidence from other more robust sources is not available. It uses a series of questionnaires,  
43 and responses are modified based on feedback.(17) The Delphi process has been used in a  
44 wide variety of research areas, including health research.(18) The classic Delphi process is  
45 characterised by a) anonymity of the participants to each other, which encourages free  
46 expression of opinion, b) iteration, c) controlled feedback from the group, and d) statistical  
47 aggregation of the group response.(18)  
48  
49  
50  
51  
52  
53  
54  
55  
56  
57  
58  
59  
60

### **Step 1. Delphi Questionnaire Development**

The WHO AFRO PEC package was divided into two components: eye health prevention/promotion and case management. An appropriate technical feasibility framework was identified by searching PubMed from January 2000 to April 2018 using the search terms “technical feasibility” and “frameworks.” The titles and abstracts of articles identified by the search strategy were screened, and potential full text articles were reviewed by a single author (AA) Figure 1A. (See *Supplementary material: Appendix 1.*)

Figure 1. Literature searches for A, technical feasibility framework, and B primary eye care in sub-Saharan Africa.

The conceptual framework to evaluate the technical complexity of public health interventions selected for this study, which was developed by Gericke et al,(16) has four dimensions: basic characteristics of the intervention, delivery characteristics, government capacity/need for regulation or legislation, and usage characteristics(16)(Table 1). Gericke’s framework has been used to determine the technical complexity of condom social marketing for the prevention of HIV/AIDS and other sexually transmitted diseases(16) and to assess aflatoxin risk reduction strategies in Africa, for example.(19) For an intervention to be deemed feasible, the technical capacity must match the technical complexity of the intervention, thus intervention complexity complements the concept of institutional capacity.(16)

**Table 1: Technical feasibility framework of Gericke**

| <b>Gericke’s framework</b>          |                                                                      |
|-------------------------------------|----------------------------------------------------------------------|
| <b>Category</b>                     | <b>Criteria</b>                                                      |
| <b>Intervention characteristics</b> |                                                                      |
| Basic product design                | Stability                                                            |
|                                     | Standardizability                                                    |
|                                     | Safety profile                                                       |
|                                     | Ease of storage                                                      |
|                                     | Ease of transport                                                    |
| Supplies                            | Need for regular supplies                                            |
| Equipment                           | High-technology equipment and infrastructure needed                  |
|                                     | Ease of acquisition                                                  |
|                                     | Number of different types of equipment needed                        |
|                                     | Maintenance needed                                                   |
| <b>Delivery characteristics</b>     |                                                                      |
| Facilities                          | Outreach services                                                    |
| Facilities                          | First-level care                                                     |
| Facilities                          | Hospital care                                                        |
| Human resources                     | Skill level required for service provision                           |
|                                     | Skill level required for staff supervision                           |
|                                     | Intensity of professional services in terms of frequency or duration |

| <b>Gericke's framework</b>              |                                                                       |
|-----------------------------------------|-----------------------------------------------------------------------|
| <b>Category</b>                         | <b>Criteria</b>                                                       |
|                                         | Management and planning requirements                                  |
| Communication and transport             | Dependence of delivery on communication and transport infrastructure  |
| <b>Government capacity requirements</b> |                                                                       |
| Regulation/legislation                  | Need for regulation.                                                  |
| Management systems                      | Need for sophisticated management systems                             |
| Collaborative action                    | Need for inter-sectoral action within government.                     |
|                                         | Need for partnership between government and external funding agencies |
| <b>Usage characteristics</b>            |                                                                       |
| Ease of use                             | Need for information and education                                    |
| Pre-existing demand                     | Need for promotion                                                    |
| Black market risk                       | Need to prevent resale/counterfeiting                                 |

The WHO AFRO PEC package was divided into two components: eye health prevention/promotion and case management. The four dimensions of Gericke's framework were applied to each component i.e., intervention characteristics, delivery characteristics, government capacity requirements and usage characteristics.

To populate the framework, a literature search on PEC in sub-Saharan Africa was conducted and all articles of primary eye care in sub-Saharan Africa up to April 2018 were searched for using MEDLINE. Search terms included "primary eye care", with "sub Saharan Africa" and "eye disease" or "eye" with "primary healthcare" and "Africa"<sup>(11)</sup> In addition, we used all the relevant articles from the two most recent published reviews on primary eye care in SSA, (11, 20) to identify evidence-based criteria for the technical complexities required to implement each component of the WHO AFRO PEC package. (Figure 1B).

Further implementation characteristics were identified by two of the authors (CG and AA) who have more than 40 years' combined experience of eye care in sub-Saharan Africa. This yielded a list of key criteria for the technical complexity of PEC. A four-point Likert scale (where 1=strongly agree and 4= strongly disagree), was applied to each of the statements and this formed the Delphi questionnaires. The Delphi questionnaires were reviewed by an expert in international eye health, (CG) a health interventions expert (HB) and a statistician (DM). They were then sent to a panel of experts in PEC in sub-Saharan Africa.

## **Step 2. Selection of experts for the Delphi exercise**

The aim was to recruit a panel of eye care professionals who were experts in eye care in sub-Saharan Africa, with expertise to validate the relevance of the selected technical complexities and capacities required to implement the WHO AFRO PEC Package. Eligibility criteria included an eye care professional with a minimum of 10 years' experience of community eye

1  
2  
3 care in sub-Saharan Africa, still professionally active, and with experience of eye health policy.  
4 They were selected by a modified exponential snowball sampling method where an initial  
5 participant provides multiple referrals.(21) Each new referral was vetted and included in the  
6 study if the eligibility criteria were met. Two of the authors AA and CG selected the initial  
7 participants and these participants nominated others based on the stated eligibility criteria.  
8  
9

### 10 **Step 3. Delphi Round 1**

11 Members of the team were contacted by email and telephone and their availability was  
12 confirmed. Written informed consent was obtained. Members were sent the following  
13 documents: the methods to be used during the Delphi exercise, an explanation of Gericke's  
14 framework of technical complexity, a draft of the technical complexities required to deliver  
15 both components of the WHO AFRO PEC package in the form of the first Delphi  
16 questionnaires. Participants were invited to state their level of agreement to each statement  
17 in the questionnaire by ticking the appropriate level in the Likert scale in a Microsoft Excel®  
18 spreadsheet. A comments box was included beside each statement for comments or  
19 suggestions.  
20  
21  
22  
23  
24  
25  
26  
27

### 28 **Step 4. Analysis of Delphi Round 1**

29 Once all the questionnaires had been received, they were analysed for consensus. Analyses  
30 were performed using STATA V, 15.1 (Statcorp, Texas) to generate descriptive statistics. No  
31 universally accepted criteria for consensus have been defined for Delphi studies.(22)  
32 However, it has been shown that consensus can be said to have been achieved if a certain  
33 proportion of the votes fall within a predefined range.(23) Consensus for this study was  
34 defined as at least 70% agreement on each statement in the upper 50<sup>th</sup> percentile (Likert  
35 scores 1 and 2). Where consensus was reached, the statements were adopted. Statements  
36 where consensus was not reached were modified based on the suggestions/comments and  
37 incorporated into the second round, as were newly identified statements.  
38  
39  
40  
41  
42  
43  
44  
45

### 46 **Step 5. Modification for technical capacity**

47 Statements included from the first round were modified so that panel members could  
48 indicate their agreement on the technical capacities which need to be available to deliver the  
49 WHO PEC package.  
50  
51  
52  
53

### 54 **Step 6. Delphi Round 2**

55 For this round, the participants received the questionnaires with the comments/suggestions  
56 of other panel members from the first round. However, this was modified for technical  
57 capacity, as stated above, and sent to the same expert panel using the same Likert scale  
58 and level of consensus.  
59  
60

## Step 7. Analysis of Delphi Round 2

Only statements that achieved at least 70% consensus in the upper 50<sup>th</sup> percentile (Likert scores 1 and 2) in the second round were included in the final document. Where consensus was reached, the statements were adopted and formed the basis of the final document. Any minority views (<70% consensus) did not form part of the adopted technical capacities but were documented. The technical capacities needed were mapped onto the WHO health system's building blocks.(24)

Patients were not involved in this study.

## RESULTS

### Composition of Delphi panel of experts

A total of 12 experts were contacted, nine of whom agreed to participate (Table 2). No response was received from the other three invitees despite at least three contacts by email. All nine completed the two rounds of the Delphi survey.

**Table 2: Characteristics of the Delphi Panel n=9**

| Characteristics                    |                       | *N (%)   |
|------------------------------------|-----------------------|----------|
| Gender                             | Female                | 5 (55.6) |
| Age                                | <50 years             | 2 (22.2) |
|                                    | >50 years             | 7 (77.8) |
| Professional group                 | Ophthalmologist       | 7 (77.8) |
|                                    | Administrator         | 2 (22.2) |
| Primary function                   | Clinician             | 3 (33.3) |
|                                    | Researcher            | 3 (33.3) |
|                                    | NGO Administrator     | 3 (33.3) |
| Type of institution                | Academic Hospital     | 2 (22.2) |
|                                    | Non-academic Hospital | 1(11,1)  |
|                                    | Research Institute    | 3 (33.3) |
|                                    | Eyecare NGO           | 3 (33.3) |
| Region of practice                 | West Africa           | 5 (56)   |
|                                    | East Africa           | 2 (22)   |
|                                    | South Africa          | 2 (22)   |
|                                    | Central Africa        | 1 (11)   |
|                                    | Europe                | 1 (11)   |
| Involved in national policy making | Yes                   | 9 (100)  |

\*some participants had multiple roles/had worked in multiple regions.



The mean number of years of experience in eye health of the participants was 31.1±8.9 (range 18-43) years.

### Delphi questionnaire development

A total of 81 statements on the technical complexity of the WHO AFRO PEC package were developed from Gericke's framework, 38 for health promotion and 43 for facility-based case management (Table 3).

**Table 3 Statements for each component of the WHO AFRO Primary Eye Care Package**

| Gericke's Framework Domains      |                             | Component of WHO AFRO PEC Package |                          |
|----------------------------------|-----------------------------|-----------------------------------|--------------------------|
|                                  |                             | Health promotion and prevention   | Facility case management |
|                                  |                             | Number of statements              |                          |
| Intervention characteristics     | Basic product design        | 7                                 | 10                       |
|                                  | Supplies                    | 2                                 | 1                        |
|                                  | Equipment                   | 3                                 | 5                        |
| Delivery characteristics         | Type of facility needed     | 3                                 | 4                        |
|                                  | Human resource requirement  | 8                                 | 9                        |
|                                  | Communication and transport | 3                                 | 2                        |
| Government capacity requirements | Regulation/legislation      | 2                                 | 4                        |
|                                  | Management systems          | 2                                 | 1                        |
|                                  | Collaborative action        | 4                                 | 3                        |
| Usage characteristics            | Ease of use                 | 2                                 | 2                        |
|                                  | Pre-existing demand         | 1                                 | 1                        |
|                                  | Black Market Risk           | 1                                 | 1                        |
| <b>Total</b>                     |                             | <b>38</b>                         | <b>43</b>                |

In the first round, there was consensus in 84% of the statements with over 40% of the statements achieving 100% consensus. (See *Supplementary material: Appendix 2.*) Based on comments from Delphi round 1, six modifications were made in the health promotion component and seven in the facility case management component. (See *Supplementary material: Appendix 3.*) The modified questionnaire formed the basis of technical capacity questionnaire for round two.

1  
2  
3 In the second round, four statements were deemed not to be applicable by 89% of  
4 participants and were removed. Consensus was achieved in 94% of the statements, with  
5 62% achieving 100% consensus. (*Supplementary material: Appendix 4.*) Results of the 34  
6 statements on technical capacity for health promotion for which consensus was reached are  
7 shown in Table 4A with their respective Likert ratings, quartile and 50<sup>th</sup> percentile values.  
8 Results of the 40 statements on technical capacity for facility case management for which  
9 consensus was reached are shown in Table 4B with their respective Likert ratings, quartile  
10 and 50<sup>th</sup> percentile values. The top quartile shows the number and proportion of participants  
11 who strongly agreed with each of the statements, while the 50<sup>th</sup> percentile shows the number  
12 and proportion of participants that strongly agreed or agreed. The technical capacities  
13 needed were mapped onto the WHO health system's building blocks (Tables 5A and 5B).  
14  
15  
16  
17  
18  
19  
20  
21  
22  
23  
24  
25  
26  
27  
28  
29  
30  
31  
32  
33  
34  
35  
36  
37  
38  
39  
40  
41  
42  
43  
44  
45  
46  
47  
48  
49  
50  
51  
52  
53  
54  
55  
56  
57  
58  
59  
60

**Table 4A: Consensus statements on technical capacity for health promotion, with analysis of Likert scales.**

| Category / criteria                                                                                                                     | Technical capacity needed (elements that need to be available)                                                                          | Top quartile |       | 50th Percentile |      | Median (IQR) |
|-----------------------------------------------------------------------------------------------------------------------------------------|-----------------------------------------------------------------------------------------------------------------------------------------|--------------|-------|-----------------|------|--------------|
|                                                                                                                                         |                                                                                                                                         | Likert 1     |       | Likert 2        |      |              |
|                                                                                                                                         |                                                                                                                                         | N            | %     | N               | %    |              |
| <b>1. Intervention characteristics</b>                                                                                                  |                                                                                                                                         |              |       |                 |      |              |
| <u>Basic product design</u>                                                                                                             |                                                                                                                                         |              |       |                 |      |              |
| Stability: usable lifetime and risk of destruction                                                                                      | Posters that promote eye health                                                                                                         | 7            | 77.8  | 9               | 100  | 1 (1-1)      |
|                                                                                                                                         | Durable posters are available                                                                                                           | 4            | 44.4  | 9               | 100  | 1 (1-2)      |
| Standardizability: the degree to which an intervention can be standardized                                                              | Standardized posters available to deliver the same message per target group                                                             | 5            | 55.6  | 9               | 100  | 1 (1-2)      |
|                                                                                                                                         | Posters available in the language of the community                                                                                      | 6            | 66.7  | 7               | 77.8 | 1 (1-2)      |
|                                                                                                                                         | Posters with self-explanatory graphics available for the non-literate                                                                   | 8            | 88.9  | 9               | 100  | 1 (1-1)      |
|                                                                                                                                         | Different types of posters available for different target groups which are appropriately displayed                                      | 5            | 55.6  | 8               | 88.9 | 1 (1-2)      |
| Number of different types of equipment needed. Maintenance needed.                                                                      | Health promotion materials available that are easy to maintain                                                                          | 5            | 55.6  | 9               | 100  | 1 (1-2)      |
|                                                                                                                                         | A system for the easy procurement of health promotion materials                                                                         | 6            | 66.7  | 9               | 100  | 1 (1-2)      |
| <b>2. Delivery characteristics</b>                                                                                                      |                                                                                                                                         |              |       |                 |      |              |
| <u>Facilities</u>                                                                                                                       |                                                                                                                                         |              |       |                 |      |              |
| Retail sector, outreach services, first-level care, hospital care                                                                       | Health promotion in the community that includes young children and their carers, diabetics and the elderly as their target audience     | 4            | 44.4  | 9               | 100  | 1 (1-2)      |
|                                                                                                                                         | Time, space and willingness to deliver opportunistic eye health promotion to groups in the facility                                     | 7            | 77.8  | 8               | 88.9 | 1 (1-1)      |
|                                                                                                                                         | Time and the willingness to deliver opportunistic eye health promotion to targeted individuals in the facility e.g. diabetics           | 5            | 55.6  | 7               | 77.8 | 1(1-2)       |
| <u>Human resources</u>                                                                                                                  |                                                                                                                                         |              |       |                 |      |              |
| Skill level required for service provision                                                                                              | Staff skilled in communicating with community members                                                                                   | 7            | 77.8  | 9               | 100  | 1 (1-1)      |
|                                                                                                                                         | Staff who are knowledgeable about community, eye diseases and where to access care                                                      | 7            | 77.8  | 9               | 100  | 1 (1-1)      |
|                                                                                                                                         | Village health workers resident in the community who are able to deliver health promotion                                               | 6            | 66.7  | 9               | 100  | 1 (1-2)      |
|                                                                                                                                         | Facility based staff who are able to deliver health promotion                                                                           | 5            | 55.6  | 9               | 100  | 1 (1-2)      |
|                                                                                                                                         | Professionals to train staff on eye health promotion and develop health promotion materials                                             | 9            | 100.0 | 9               | 100  | 1 (1-1)      |
| Skill level required for staff supervision. Degree of supervision required                                                              | Supervisors who are able to supervise health promotion activities including eye health                                                  | 7            | 77.8  | 9               | 100  | 1 (1-1)      |
| Intensity of professional services in terms of frequency or duration e.g. on schedule/periodic or continuous to accommodate emergencies | Staff who regularly deliver health promotion on schedule                                                                                | 7            | 77.8  | 9               | 100  | 1 (1-1)      |
| Need for managerial staff: management and planning requirements                                                                         | Existing managerial staff who plan and organise target audience to be sensitised in appropriate locations e.g. carers of young children | 5            | 55.6  | 9               | 100  | 1 (1-2)      |
| <u>Communication and transport</u>                                                                                                      |                                                                                                                                         |              |       |                 |      |              |

| Category / criteria | Technical capacity needed (elements that need to be available)                                                | Top quartile |      | 50th Percentile |      | Median (IQR) |
|---------------------|---------------------------------------------------------------------------------------------------------------|--------------|------|-----------------|------|--------------|
|                     |                                                                                                               | N            | %    | N               | %    |              |
| 1                   |                                                                                                               |              |      |                 |      |              |
| 2                   |                                                                                                               |              |      |                 |      |              |
| 3                   |                                                                                                               |              |      |                 |      |              |
| 4                   | Dependence of delivery on communication and transport infrastructure: telephones, roads                       | 6            | 66.7 | 7               | 77.8 | 1 (1-2)      |
| 5                   |                                                                                                               |              |      |                 |      |              |
| 6                   |                                                                                                               |              |      |                 |      |              |
| 7                   | Need for substantial exchange of information between different sectors or levels of care                      | 8            | 88.9 | 9               | 100  | 1 (1-1)      |
| 8                   |                                                                                                               |              |      |                 |      |              |
| 9                   | Staff who are able to communicate in the local language                                                       | 9            | 100  | 9               | 100  | 1 (1-1)      |
| 10                  |                                                                                                               |              |      |                 |      |              |
| 11                  | <b>3. Government capacity requirements</b>                                                                    |              |      |                 |      |              |
| 12                  | <u>Regulation/legislation</u>                                                                                 |              |      |                 |      |              |
| 13                  |                                                                                                               |              |      |                 |      |              |
| 14                  | Need for legislation/regulation, monitoring regulatory measures and enforcement of regulation                 | 5            | 55.6 | 8               | 88.9 | 1 (1-2)      |
| 15                  |                                                                                                               |              |      |                 |      |              |
| 16                  | Eye health promotion activities that are recorded and monitored                                               | 4            | 44.4 | 7               | 77.8 | 1 (1-1)      |
| 17                  |                                                                                                               |              |      |                 |      |              |
| 18                  |                                                                                                               |              |      |                 |      |              |
| 19                  | National blindness prevention strategy that incorporates eye health promotion                                 | 9            | 88.9 | 8               | 88.9 | 1 (1-1)      |
| 20                  |                                                                                                               |              |      |                 |      |              |
| 21                  | Need for sophisticated management systems and managerial staff. Level of management and planning requirements | 4            | 44.4 | 7               | 77.8 | 2(1-2)       |
| 22                  |                                                                                                               |              |      |                 |      |              |
| 23                  |                                                                                                               |              |      |                 |      |              |
| 24                  |                                                                                                               |              |      |                 |      |              |
| 25                  | <u>Collaborative action</u>                                                                                   |              |      |                 |      |              |
| 26                  |                                                                                                               |              |      |                 |      |              |
| 27                  | Need for inter-sectoral action within government. Need for partnership between government and civil society.  | 6            | 66.7 | 9               | 100  | 1 (1-2)      |
| 28                  |                                                                                                               |              |      |                 |      |              |
| 29                  | Existing school health programmes.                                                                            | 3            | 33.3 | 7               | 77.8 | 2(1-2)       |
| 30                  |                                                                                                               |              |      |                 |      |              |
| 31                  | Collaborations with NGOs to provide health promotion                                                          | 1            | 11.1 | 7               | 77.8 | 2(1-2)       |
| 32                  |                                                                                                               |              |      |                 |      |              |
| 33                  | Need for partnership between government and external funding agencies                                         | 7            | 77.8 | 9               | 100  | 1 (1-1)      |
| 34                  |                                                                                                               |              |      |                 |      |              |
| 35                  | Collaboration between communities and frontline health communities                                            |              |      |                 |      |              |
| 36                  | <b>4. Usage characteristics</b>                                                                               |              |      |                 |      |              |
| 37                  |                                                                                                               |              |      |                 |      |              |
| 38                  | <u>Ease of use</u>                                                                                            |              |      |                 |      |              |
| 39                  |                                                                                                               |              |      |                 |      |              |
| 40                  | Need for information and education                                                                            | 9            | 88.9 | 9               | 100  | 1 (1-1)      |
| 41                  |                                                                                                               |              |      |                 |      |              |
| 42                  | Need for supervision                                                                                          | 9            | 88.9 | 9               | 100  | 1 (1-1)      |
| 43                  | <u>Pre-existing demand</u>                                                                                    |              |      |                 |      |              |
| 44                  |                                                                                                               |              |      |                 |      |              |
| 45                  | Need for promotion                                                                                            | 9            | 88.9 | 9               | 100  | 1 (1-1)      |
| 46                  |                                                                                                               |              |      |                 |      |              |
| 47                  | <u>Black market risk</u>                                                                                      |              |      |                 |      |              |
| 48                  |                                                                                                               |              |      |                 |      |              |
| 49                  | Need to prevent resale/counterfeiting                                                                         | 7            | 77.8 | 9               | 100  | 1 (1-1)      |
| 50                  |                                                                                                               |              |      |                 |      |              |
| 51                  |                                                                                                               |              |      |                 |      |              |
| 52                  |                                                                                                               |              |      |                 |      |              |
| 53                  |                                                                                                               |              |      |                 |      |              |
| 54                  |                                                                                                               |              |      |                 |      |              |
| 55                  |                                                                                                               |              |      |                 |      |              |
| 56                  |                                                                                                               |              |      |                 |      |              |
| 57                  |                                                                                                               |              |      |                 |      |              |
| 58                  |                                                                                                               |              |      |                 |      |              |
| 59                  |                                                                                                               |              |      |                 |      |              |
| 60                  |                                                                                                               |              |      |                 |      |              |

**Table 4B: Consensus statements on technical capacity for Facility Case Management, with analysis of Likert scales**

| Category / Criteria                                 | Technical capacity needed (elements that need to be available)                                              | Top quartile |      | 50th percentile |      | Median |
|-----------------------------------------------------|-------------------------------------------------------------------------------------------------------------|--------------|------|-----------------|------|--------|
|                                                     |                                                                                                             | Likert 1     |      | Likert 2        |      | (IQR)  |
|                                                     |                                                                                                             | N            | %    | N               | %    |        |
| <b>1. Intervention characteristics</b>              |                                                                                                             |              |      |                 |      |        |
| <u>Basic product design</u>                         |                                                                                                             |              |      |                 |      |        |
| Stability/ease of storage/ease of transport         | Torches can be solar powered and are stable                                                                 | 6            | 66.7 | 9               | 100  | 1(1-2) |
|                                                     | Appropriate and secure storage for drugs and consumables                                                    | 8            | 88.9 | 9               | 100  | 1(1-1) |
|                                                     | Eye drops that do not require cool storage should be stocked                                                | 5            | 55.6 | 8               | 88.9 | 1(1-2) |
|                                                     | Tetanus toxoid, which requires cool storage                                                                 | 6            | 66.7 | 8               | 88.9 | 1(1-2) |
|                                                     | Topical antibiotic ointment does not require cold storage                                                   | 6            | 66.7 | 8               | 88.9 | 1(1-2) |
|                                                     | Sterile saline solution for eye irrigation is stable                                                        | 4            | 44.4 | 7               | 77.8 | 1(1-2) |
|                                                     | High dose vitamin A is stable                                                                               | 5            | 55.6 | 9               | 100  | 2(1-2) |
|                                                     | Injectable antibiotics, for ophthalmia neonatorum and other conditions, may require cool storage            | 4            | 44.4 | 7               | 77.8 | 1(1-2) |
|                                                     | Pre-existing PHC transport channels should be available to transport PEC consumables.                       | 7            | 77.8 | 9               | 100  | 1(1-1) |
| Standardizability                                   | The WHO AFRO PEC Package is standardized                                                                    | 6            | 66.7 | 9               | 100  | 1(1-2) |
| Safety profile                                      | Staff who are trained/can be trained to deliver the intervention correctly and not cause harm               | 8            | 88.9 | 9               | 100  | 1(1-1) |
| <u>Supplies</u>                                     |                                                                                                             |              |      |                 |      |        |
| Need for regular supplies                           | Medication supply system to support regular supply of eye medications and consumables                       | 8            | 88.9 | 9               | 100  | 1(1-1) |
| <u>Equipment</u>                                    |                                                                                                             |              |      |                 |      |        |
| High-technology equipment and infrastructure needed | Diagnostic equipment: Snellen distance visual acuity chart; near visual acuity chart, torches and batteries | 7            | 77.8 | 9               | 100  | 1(1-1) |
|                                                     | Adequate space to use appropriate, standardized visual acuity charts                                        | 6            | 66.7 | 8               | 88.9 | 1(1-2) |
|                                                     | Adequate space for counselling patients                                                                     | 8            | 88.9 | 9               | 100  | 1(1-1) |
| Number of different types of equipment needed       | One set of diagnostic equipment                                                                             | 6            | 66.7 | 8               | 88.9 | 1(1-2) |
| Maintenance needed                                  | System to maintain equipment in the facility                                                                | 5            | 55.6 | 9               | 100  | 1(1-2) |
| <b>2. Delivery characteristics</b>                  |                                                                                                             |              |      |                 |      |        |
| <u>Facilities</u>                                   |                                                                                                             |              |      |                 |      |        |
| First-level care                                    | Eye care services to manage uncomplicated eye conditions.                                                   | 6            | 66.7 | 9               | 100  | 1(1-2) |
| Hospital care                                       | Referral hospital to manage complicated eye conditions.                                                     | 8            | 88.9 | 9               | 100  | 1(1-1) |
| <u>Human resources</u>                              |                                                                                                             |              |      |                 |      |        |
|                                                     | Staff able to make a diagnosis (take a history; measuring visual acuity; basic eye examination)             | 8            | 88.9 | 9               | 100  | 1(1-1) |
| Skill level required for service provision          | Staff able to manage some conditions e.g., eye irrigation; remove foreign bodies; give IM injections        | 8            | 88.9 | 9               | 100  | 1(1-1) |
|                                                     | Staff able to identify which cases to refer and the level of urgency                                        | 8            | 88.9 | 9               | 100  | 1(1-1) |

| Category / Criteria | Technical capacity needed (elements that need to be available)                                          | Top quartile    |                 | 50th percentile |                 | Median (IQR) |
|---------------------|---------------------------------------------------------------------------------------------------------|-----------------|-----------------|-----------------|-----------------|--------------|
|                     |                                                                                                         | Likert 1<br>N % | Likert 2<br>N % | Likert 2<br>N % | Likert 2<br>N % |              |
| 1                   |                                                                                                         |                 |                 |                 |                 |              |
| 2                   |                                                                                                         |                 |                 |                 |                 |              |
| 3                   |                                                                                                         |                 |                 |                 |                 |              |
| 4                   | Skill level required for staff supervision. Degree of supervision required.                             | 6               | 66.7            | 9               | 100             | 1(1-2)       |
| 5                   |                                                                                                         |                 |                 |                 |                 |              |
| 6                   |                                                                                                         |                 |                 |                 |                 |              |
| 7                   | Regular supervision of PHC activities and PEC activities                                                | 6               | 66.7            | 9               | 100             | 1(1-2)       |
| 8                   |                                                                                                         |                 |                 |                 |                 |              |
| 9                   | Frequency or duration of services: e.g. on schedule /periodic or continuous to accommodate emergencies  | 8               | 88.9            | 9               | 100             | 1(1-1)       |
| 10                  |                                                                                                         |                 |                 |                 |                 |              |
| 11                  |                                                                                                         |                 |                 |                 |                 |              |
| 12                  |                                                                                                         |                 |                 |                 |                 |              |
| 13                  | Facility managers who supply consumables and plan purchasing                                            | 6               | 66.7            | 9               | 100             | 1(1-2)       |
| 14                  |                                                                                                         |                 |                 |                 |                 |              |
| 15                  | Management and planning requirements. Need for managerial staff                                         | 5               | 55.6            | 7               | 77.8            | 1(1-2)       |
| 16                  |                                                                                                         |                 |                 |                 |                 |              |
| 17                  |                                                                                                         |                 |                 |                 |                 |              |
| 18                  | Managerial systems to coordinate staff rotations to ensure daily facility coverage by trained PEC staff | 7               | 77.8            | 9               | 100             | 1(1-1)       |
| 19                  |                                                                                                         |                 |                 |                 |                 |              |
| 20                  | <u>Communication and Transport</u>                                                                      |                 |                 |                 |                 |              |
| 21                  |                                                                                                         |                 |                 |                 |                 |              |
| 22                  | Depends on delivery of communication and transport infrastructure                                       | 6               | 66.7            | 9               | 100             | 1(1-2)       |
| 23                  |                                                                                                         |                 |                 |                 |                 |              |
| 24                  | Transportation between the PH facility and referral centre                                              | 3               | 33.3            | 7               | 77.8            | 1(1-2)       |
| 25                  |                                                                                                         |                 |                 |                 |                 |              |
| 26                  | <b>3. Government capacity requirements</b>                                                              |                 |                 |                 |                 |              |
| 27                  | <u>Regulation/legislation</u>                                                                           |                 |                 |                 |                 |              |
| 28                  |                                                                                                         |                 |                 |                 |                 |              |
| 29                  | Need for regulation                                                                                     | 6               | 66.7            | 8               | 88.9            | 1(1-1)       |
| 30                  |                                                                                                         |                 |                 |                 |                 |              |
| 31                  | Regulatory measures need to be enforced and regulated                                                   | 7               | 77.8            | 9               | 100             | 1(1-1)       |
| 32                  |                                                                                                         |                 |                 |                 |                 |              |
| 33                  |                                                                                                         |                 |                 |                 |                 |              |
| 34                  | Reporting systems for measles outbreaks                                                                 | 9               | 100.0           | 9               | 100             | 1(1-1)       |
| 35                  |                                                                                                         |                 |                 |                 |                 |              |
| 36                  | Reporting system for ophthalmia neonatorum                                                              | 7               | 77.8            | 9               | 100             | 1(1-1)       |
| 37                  | <u>Management systems</u>                                                                               |                 |                 |                 |                 |              |
| 38                  | Sophisticated management systems required                                                               | 7               | 77.8            | 9               | 100             | 1(1-1)       |
| 39                  |                                                                                                         |                 |                 |                 |                 |              |
| 40                  |                                                                                                         |                 |                 |                 |                 |              |
| 41                  | <u>Collaborative action</u>                                                                             |                 |                 |                 |                 |              |
| 42                  | Inter-sectoral action needed within government, and partnership between government and civil society    | 6               | 66.7            | 9               | 100             | 1(1-2)       |
| 43                  |                                                                                                         |                 |                 |                 |                 |              |
| 44                  |                                                                                                         |                 |                 |                 |                 |              |
| 45                  |                                                                                                         |                 |                 |                 |                 |              |
| 46                  | <b>4. Usage Characteristics</b>                                                                         |                 |                 |                 |                 |              |
| 47                  | <u>Need for supervision</u>                                                                             |                 |                 |                 |                 |              |
| 48                  | Staff who make supervisory home visits                                                                  | 5               | 55.6            | 7               | 77.8            | 1(1-2)       |
| 49                  |                                                                                                         |                 |                 |                 |                 |              |
| 50                  | Staff who supervise referrals to ensure compliance                                                      | 4               | 44.4            | 8               | 88.9            | 1(1-2)       |
| 51                  |                                                                                                         |                 |                 |                 |                 |              |
| 52                  | <u>Pre-existing demand</u>                                                                              |                 |                 |                 |                 |              |
| 53                  | Need for promotion                                                                                      | 4               | 44.4            | 8               | 88.9            | 1(1-2)       |
| 54                  |                                                                                                         |                 |                 |                 |                 |              |
| 55                  | <u>Black market risk</u>                                                                                |                 |                 |                 |                 |              |
| 56                  | Need to prevent resale/counterfeiting                                                                   | 6               | 66.7            | 8               | 88.9            | 1(1-2)       |
| 57                  |                                                                                                         |                 |                 |                 |                 |              |
| 58                  |                                                                                                         |                 |                 |                 |                 |              |
| 59                  |                                                                                                         |                 |                 |                 |                 |              |
| 60                  |                                                                                                         |                 |                 |                 |                 |              |

**Tables 5A and B: Gericke's framework; technical capacities needed to deliver (A) health promotion, and (B) facility-based case management.****A. Health promotion**

| Category                                                  | Criteria                                                                                                                                 | Technical Capacity: Elements that need to be available                                                                                            | Health system building block   |
|-----------------------------------------------------------|------------------------------------------------------------------------------------------------------------------------------------------|---------------------------------------------------------------------------------------------------------------------------------------------------|--------------------------------|
| <b>Intervention characteristics</b>                       |                                                                                                                                          |                                                                                                                                                   |                                |
| <u>Basic product design</u>                               | <i>Stability</i>                                                                                                                         | Posters that promote eye health should be available. Posters should be durable.                                                                   | Infrastructure, technology etc |
|                                                           | <i>Standardizability</i>                                                                                                                 | Standardized posters, delivering the same message per target group.                                                                               |                                |
|                                                           |                                                                                                                                          | Posters that are in the language of the community.                                                                                                |                                |
|                                                           |                                                                                                                                          | Posters with self-explanatory graphics should be available for the illiterate.                                                                    |                                |
| <u>Supplies and equipment</u>                             | <i>Ease of acquisition</i>                                                                                                               | Easy system to procure health promotion materials.                                                                                                | Infrastructure, technology etc |
|                                                           | <i>Number of different types of equipment needed</i>                                                                                     | Different types of posters available for different target groups which are appropriately displayed.                                               |                                |
|                                                           | <i>Maintenance needed</i>                                                                                                                | Health promotion materials available that are easy to maintain.                                                                                   |                                |
| <b>Delivery characteristics</b>                           |                                                                                                                                          |                                                                                                                                                   |                                |
| <u>Facilities</u>                                         | <i>Outreach services</i>                                                                                                                 | Health promotion that includes young children and their carers, diabetics and the elderly as the target audience in the community.                | Service delivery               |
|                                                           | <i>First-level care</i>                                                                                                                  | Time and space available, and staff willing to deliver opportunistic eye health promotion to specific groups in the facility                      |                                |
|                                                           | <i>First-level care</i>                                                                                                                  | Time and space available, and staff willing to deliver opportunistic eye health promotion to specific individuals in the facility e.g. diabetics. |                                |
| <u>Human resources</u>                                    | <i>Skill level required for service provision</i>                                                                                        | Staff skilled in communicating with community members                                                                                             | Health workforce               |
|                                                           |                                                                                                                                          | Staff who are knowledgeable about community, eye diseases and where to access care                                                                |                                |
|                                                           | <i>Intensity of professional services in terms of frequency or duration</i>                                                              | Village health workers resident in the community who are able to regularly deliver health promotion.                                              |                                |
|                                                           |                                                                                                                                          | Facility-based staff who are able to regularly deliver health promotion.                                                                          |                                |
|                                                           |                                                                                                                                          | Professionals to train staff on eye health promotion and develop health promotion materials.                                                      |                                |
|                                                           | <i>Skill level required for staff supervision</i>                                                                                        | Supervisors who are able to supervise health promotion activities including eye health.                                                           |                                |
| Staff who regularly deliver health promotion on schedule. |                                                                                                                                          |                                                                                                                                                   |                                |
| <i>Management and planning requirements</i>               | Existing managerial staff who plan and organise target audience to be sensitised in appropriate locations e.g. carers of young children. |                                                                                                                                                   |                                |

|                                                                   |                                                                              |                                                                                                                                                              |                                |
|-------------------------------------------------------------------|------------------------------------------------------------------------------|--------------------------------------------------------------------------------------------------------------------------------------------------------------|--------------------------------|
| <u>Communication and transport</u>                                | <i>Dependence of delivery on communication and transport infrastructure</i>  | Local transport infrastructure to visit communities.                                                                                                         | Infrastructure, technology etc |
|                                                                   |                                                                              | Appropriate communication channels between the community and PHC facilities.                                                                                 | Service delivery/HMIS          |
|                                                                   |                                                                              | Staff who are able to communicate in the local language.                                                                                                     | Health workforce               |
| <b>Government capacity requirements</b>                           |                                                                              |                                                                                                                                                              |                                |
| <u>Regulation/legislation</u>                                     | <i>Need for regulation/legislation.</i>                                      | Health promotion materials which have been approved and endorsed by local regulatory authorities.                                                            | Governance and leadership      |
|                                                                   |                                                                              | A national blindness prevention strategy that incorporates eye health promotion.                                                                             |                                |
| <u>Management systems</u>                                         | <i>Need for management systems</i>                                           | Existing managerial structures for health promotion can be used. Eye health promotion activities that are recorded and monitored.                            | HMIS                           |
| <u>Collaborative action</u>                                       | <i>Need for inter-sectoral action within government.</i>                     | Intersectoral activities within government or partnerships between government and civil society.                                                             | Governance and leadership      |
|                                                                   |                                                                              | Existing school health programmes.                                                                                                                           | Service delivery               |
|                                                                   | <i>Need for partnership between government and external funding agencies</i> | Collaborations with NGOs to provide health promotion                                                                                                         | Governance and leadership      |
| Collaboration between communities and PHC facilities is required. |                                                                              |                                                                                                                                                              |                                |
| <b>Usage characteristics</b>                                      |                                                                              |                                                                                                                                                              |                                |
| <u>Ease of use</u>                                                | <i>Need for information and education/need for supervision</i>               | Communication channels with community that are available to inform target population                                                                         | Service delivery               |
|                                                                   |                                                                              | Staff who are available to supervise health promotion activities                                                                                             | Governance and leadership      |
| <u>Pre-existing demand</u>                                        | <i>Need for promotion</i>                                                    | Staff who are able to engage in eye health promotion to target audience to significantly increase demand.                                                    | Service delivery               |
| <u>Black market risk</u>                                          | <i>Need to prevent resale/counterfeiting</i>                                 | Staff who are able and willing to engage with traditional healers and train them to identify and refer eye conditions. A system that supports this training. |                                |



Table 5B Facility-based case management

| Category                            | Criteria                                                                                                      | Technical Capacity: Elements that need to be available                                                                       | Health system building block   |
|-------------------------------------|---------------------------------------------------------------------------------------------------------------|------------------------------------------------------------------------------------------------------------------------------|--------------------------------|
| <b>Intervention characteristics</b> |                                                                                                               |                                                                                                                              |                                |
| <u>Basic product design</u>         | <i>Stability and ease of storage</i>                                                                          | Torches should be available. They can be solar powered and are stable.                                                       | Infrastructure, technology etc |
|                                     |                                                                                                               | Appropriate and secure storage for drugs and consumables should be available                                                 |                                |
|                                     |                                                                                                               | Eye drops that do not require cool storage should be stocked                                                                 |                                |
|                                     |                                                                                                               | Tetanus toxoid will require cool storage and should be available from facility childhood immunisation activities             |                                |
|                                     |                                                                                                               | Topical antibiotic ointment does not require cold storage and should be available.                                           |                                |
|                                     |                                                                                                               | Injectable antibiotics for ophthalmia neonatorum may require cool storage but should be available to treat other conditions. |                                |
|                                     |                                                                                                               | Sterile saline solution for eye irrigation is stable and should be available                                                 |                                |
|                                     |                                                                                                               | High dose vitamin A is stable and should be available from Maternal and Child health activities.                             |                                |
| <i>Ease of transport</i>            | Pre-existing PHC transport channels should be available to transport PEC consumables.                         | Health workforce                                                                                                             |                                |
| <i>Standardizability</i>            | The WHO AFRO PEC Package is standardized and can be available in all Primary Care facilities                  |                                                                                                                              |                                |
| <i>Safety profile</i>               | Available staff who are trained/can be trained to deliver the intervention correctly so as not to cause harm. |                                                                                                                              |                                |
| <u>Supplies and equipment</u>       | <i>Need for regular supplies</i>                                                                              | A medication supply system that can support the regular supply of eye medications and consumables                            | Infrastructure, technology etc |
|                                     | <i>High-technology equipment and infrastructure needed</i>                                                    | Diagnostic equipment is available: Snellen distance visual acuity chart; near visual acuity chart, torches and batteries.    |                                |
|                                     |                                                                                                               | Adequate space to support the use of appropriate and standardized visual acuity charts.                                      |                                |
|                                     |                                                                                                               | Adequate space for counselling patients should be available.                                                                 |                                |
|                                     | <i>Number of different types of equipment needed</i>                                                          | The availability of one set of diagnostic equipment                                                                          |                                |
| <i>Maintenance needed</i>           | An available system for the maintenance of facility equipment.                                                |                                                                                                                              |                                |

| <b>Delivery characteristics</b>             |                                                                                                                                                                |                                                                                                                                                |                                |
|---------------------------------------------|----------------------------------------------------------------------------------------------------------------------------------------------------------------|------------------------------------------------------------------------------------------------------------------------------------------------|--------------------------------|
| <u>Facilities</u>                           | <i>First-level care</i>                                                                                                                                        | The availability of eye care services to manage uncomplicated eye conditions.                                                                  | Service delivery               |
| <u>Facilities</u>                           | <i>Hospital care</i>                                                                                                                                           | The availability of a referral hospital to manage complicated eye conditions.                                                                  |                                |
| <u>Human resources</u>                      | <i>Skill level required for service provision</i>                                                                                                              | Staff who are able to make a diagnosis (eliciting a history; measuring visual acuity; basic eye examination)                                   |                                |
|                                             |                                                                                                                                                                | Staff who are able to manage some conditions e.g., eye irrigation; removal of foreign bodies; give IM injections (tetanus toxoid; antibiotics) |                                |
|                                             |                                                                                                                                                                | Staff who are able to identify which cases to refer and the level of urgency                                                                   |                                |
|                                             | <i>Skill level required for staff supervision</i>                                                                                                              | PHC supervisors who are knowledgeable about eye conditions and their management.                                                               | Governance and leadership      |
|                                             |                                                                                                                                                                | Supervisors who regularly supervise PHC activities and can supervise PEC activities                                                            |                                |
|                                             | <i>Intensity of professional services in terms of frequency or duration</i>                                                                                    | Staff trained in PEC who are available continuously to manage eye conditions, especially emergencies.                                          | Service delivery               |
| <i>Management and planning requirements</i> | Existing managerial facility staff who are able to manage the supply of consumables and plan purchasing.                                                       | Governance and leadership                                                                                                                      |                                |
|                                             | Existing managerial facility staff who are able to establish and maintain referral and feedback mechanisms between the PHC facility and eye department/clinic. |                                                                                                                                                |                                |
|                                             | Existing managerial systems to coordinate staff rotations to ensure daily facility coverage by trained PEC staff.                                              |                                                                                                                                                |                                |
| <u>Communication and transport</u>          | <i>Dependence of delivery on communication and transport infrastructure</i>                                                                                    | Communication channels to maintain referral and feedback mechanisms between the PHC facility and the referral centre.                          | Infrastructure, technology etc |
|                                             |                                                                                                                                                                | Transport between the PHC facility and the referral centre.                                                                                    |                                |
| <b>Government capacity requirements</b>     |                                                                                                                                                                |                                                                                                                                                |                                |
| <u>Regulation/legislation</u>               | <i>Need for regulation.</i>                                                                                                                                    | Appropriate medication and equipment need to be on the national essential drug list to facilitate availability.                                | Governance and leadership      |
| <u>Management systems</u>                   | <i>Need for sophisticated management systems</i>                                                                                                               | A system that regulates drug prescription and dispensing by appropriate staff.                                                                 |                                |
|                                             |                                                                                                                                                                | Communication channels to report measles outbreaks to relevant authorities.                                                                    |                                |
|                                             |                                                                                                                                                                | Communication channels to report cases of ophthalmia neonatorum to relevant authorities                                                        |                                |
|                                             |                                                                                                                                                                | Existing managerial structures for PHC that can be used to manage PEC.                                                                         | HMIS                           |

|                       |                              |                                                                                                                          |                                                                                                                                                              |                           |
|-----------------------|------------------------------|--------------------------------------------------------------------------------------------------------------------------|--------------------------------------------------------------------------------------------------------------------------------------------------------------|---------------------------|
| 1<br>2<br>3<br>4<br>5 | <u>Collaborative action</u>  | <i>Need for inter-sectoral action within government or partnership between government and external funding agencies.</i> | Availability of inter-sectoral action within government or partnerships between government and civil society.                                                | Governance and leadership |
| 6                     | <b>Usage characteristics</b> |                                                                                                                          |                                                                                                                                                              |                           |
| 7                     |                              |                                                                                                                          |                                                                                                                                                              |                           |
| 8<br>9<br>10          | <u>Ease of use</u>           | <i>Need for information and education/need for supervision</i>                                                           | Staff who are available to make supervisory home visits.<br>Staff who are able to supervise referrals to secondary centres to ensure compliance.             | Governance and leadership |
| 11                    | <u>Pre-existing demand</u>   | <i>Need for promotion</i>                                                                                                | Staff who are able to engage in eye health promotion to target audience.                                                                                     |                           |
| 12<br>13<br>14        | <u>Black market risk</u>     | <i>Need to prevent resale/counterfeiting</i>                                                                             | Staff who are able and willing to engage with traditional healers and train them to identify and refer eye conditions. A system that supports this training. | Service delivery          |

## DISCUSSION

Despite global and regional interest in PEC,(8, 10, 25, 26) insights into the technical complexity of PEC and the technical capacities required to deliver it within PHC in SSA are lacking. The technical complexity was assessed using the well-known framework devised by Gericke, which complements the notion of institutional capacity in determining the feasibility of implementing or scaling up an intervention. (16)

In this study we did not address other aspects of feasibility, such as legal and financial feasibility, and it may be argued that health financing is an important element to consider in low resource countries, particularly in SSA where less than half the countries have the minimum level of health financing of 44 United States Dollars per capita.(27) However, non-financial resources are considered to be the critical factor limiting the implementation of health interventions. (16)

To the best of our knowledge, this is the first Delphi exercise to explore the technical capacities needed to implement the WHO AFRO PEC package in sub-Saharan Africa. Our study complements a recent systematic review on health systems preparedness for integration of services at the PHC level,(28) and tools developed from our study will enable identification of elements of the health system at primary level which need to be strengthened to deliver PEC. This is important as the delivery of PEC can only be as effective as the PHC into which it is integrated.(11) Having said this, it is important to recognise that eye health needs to be integrated into all levels of the health system to achieve universal coverage for eye health.(10, 29)

Data to populate Gericke's framework were largely derived from a detailed review of the literature of PEC in SSA. Consensus on the capacities required to deliver PEC were reached after a two-round Delphi exercise by experts in public health for eye care in sub-Saharan Africa; researchers, clinicians, policy makers and administrators. The primary function of panel members was evenly distributed between these three categories, and as all had been involved in policy development and service delivery for eye care in the region, they were experienced in what was feasible and what was not.

The literature review and the high consensus from the panel of experts increase the validity of the findings. In the first round over four-fifths of the statements reached the predefined consensus, which implies that the majority of the technical complexities aligned with the views of the expert panel and their familiarity with the literature. In the second round, there was consensus on almost all the statements, with 100% consensus for almost two thirds.

1  
2  
3 This is to be expected, as the technical capacities were derived from the technical  
4 complexities. For example, one of the technical complexities was “hospital services are  
5 needed for referrals, severe cases, treatment failures, further investigations and  
6 management, as required” and the technical capacity derived was “the availability of a  
7 referral hospital to manage complicated eye conditions”.

8  
9  
10  
11  
12  
13 The human resource elements of the delivery characteristics domain for health promotion  
14 and facility-based management had perfect consensus. Human resources for health (HRH)  
15 has been identified as a key component for the successful implementation of health  
16 interventions(30) which was emphasised in two review articles on PEC in SSA.(11, 20)  
17 Government support and strong partnerships are crucial for the success of PEC in terms of  
18 sustainability and scaling up, as advocated in the WHO Global Action Plan (2014-2019) and  
19 for regulatory activities.(10) Hence the majority of elements in this domain had near perfect  
20 consensus. All the elements in the usage characteristics domain for health promotion had  
21 perfect consensus in the final round, emphasizing the importance of creating demand (31)  
22 and reducing the impact of harmful traditional eye practices. (32)

23  
24  
25  
26  
27  
28  
29  
30 The WHO Health systems building blocks were mapped unto appropriate elements of the  
31 final technical capacity profile for PEC. Adopting a health systems strengthening approach in  
32 which eye health is included in all the building blocks will amplify the benefits of the  
33 intervention(33) and promote sustainability.

34  
35  
36  
37 The technical capacity frameworks for delivering the WHO AFRO PEC package were  
38 developed using data and experts from a range of SSA countries. However, caution is  
39 needed in extrapolating the findings from the Delphi exercise in this study to all WHO AFRO  
40 countries, as local adaptation of the WHO AFRO package may be required, and hence the  
41 capacities needed to address varying eye health needs in different settings and PHC  
42 contexts. For example, the cadres providing PHC are likely to vary, as is the availability of  
43 informal health providers.

44  
45  
46  
47  
48  
49 There are several strengths and limitations of this study. The selection of the expert panel is  
50 a crucial part of the Delphi process as the output is based on their expert opinion.(34) Our  
51 expert panel was a non-random sample, and this may have led to hidden biases as the  
52 participants may not be representative of all the experts with the pre-determined inclusion  
53 criteria. Indeed, almost half of the participants were from West Africa, but the majority had  
54 worked in agencies that had oversight of sub-Saharan African eye health care. Another  
55 limitation is that although all panel members had relevant expertise and experience, primary  
56  
57  
58  
59  
60

1  
2  
3 health care practitioners were not included, as the focus was on eye care which the majority  
4 of primary health care practitioners in Africa would have little experience of.  
5  
6  
7

8 One of the disadvantages of the Delphi consensus is that it provides low level evidence  
9 (expert opinion) (35) as randomised controlled trials provide the highest level evidence; only  
10 a few trials have been undertaken on PEC in low and middle income countries.(36)  
11 However, the Delphi method is useful when there are limited data to guide clinical practice.  
12 In this study, the framework for the questionnaires was a validated framework which has  
13 been used to assess the non-financial inputs needed to implement new interventions with a  
14 view to scaling up.(16) Our study used anonymity, which is an inherent strength of the Delphi  
15 process, which helped avoid undue influence by any members and the efficient harnessing  
16 of expert opinion from diversely geographically dispersed experts(37) (38) from East, West,  
17 Southern Africa and the United Kingdom. Another strength of our study is the low non-  
18 response bias. Although 12 experts were invited to participate, nine agreed and all  
19 completed both Delphi rounds.  
20  
21  
22  
23  
24  
25  
26  
27

28 This study has generated the first technical feasibility capacity profile for primary eye care to  
29 guide countries wishing to implement primary eye care, based on an internationally accepted  
30 feasibility framework, a review of the PEC literature and expert opinion. However, there was  
31 limited published evidence on PEC in SSA from which the technical capacities were derived.  
32 As more high-level evidence studies on PEC in SSA are conducted, the document will need  
33 to be revised.  
34  
35  
36  
37  
38

### 39 **Future research**

40 Mixed-methods data collection tools for different participant groups (village health workers,  
41 PHC workers, heads of facilities, district supervisors) in Nigeria have been developed based  
42 on our capacity frameworks i.e., structured questionnaires, observational check lists and  
43 topic guides for in-depth interviews. A number of PHC facilities in Southeast Nigeria have  
44 been assessed using these tools and a gap analysis will be conducted. The capacity of PHC  
45 to deliver eye care has sparked passionate debates(29) and robust studies on the  
46 effectiveness of PEC will be needed in the future.  
47  
48  
49  
50  
51  
52

### 53 **CONCLUSIONS**

54 Consensus was reached on the technical capacities which need to be in place to deliver the  
55 WHO AFRO PEC package using a Delphi exercise. Based on this document, study tools  
56 have been developed to assess health system gaps in primary health care in Nigeria.  
57  
58  
59  
60

Countries or health units wishing to implement PEC using the WHO AFRO PEC package should address any capacity gaps before implementing or scaling up this intervention.

## Abbreviations

HMIS Health management information systems

IM intramuscular

NGO Non-Governmental Organisation

PEC Primary Eye Care

PHC Primary Health Care

SSA Sub-Saharan Africa

## Declarations

### Ethics approval and consent to participate.

This was part of a wider study on PEC, and ethical approval was obtained from the Ethics Committees of the Federal Ministry of Health, Nigeria (NHREC Approval Number NHREC/01/01/2007-12/03/2018) and the London School of Hygiene & Tropical Medicine (LSHTM Ethics Ref: 14624).

### Consent for publication

Not Applicable

### Availability of data and materials

All data relevant to the study are included in the article or uploaded as supplementary information.

### Competing interests

The authors declare that they have no competing interests

### Author Contributions

AA, HB and CG were responsible for the design and conception of the work. AF, WM, HF, RU, FE, SI, FK, BW contributed to the acquisition of data. AA drafted the work. AA, HB and

1  
2  
3 CG substantially revised it. All authors made some input into the final version and have  
4 approved the submitted version.  
5  
6

### 7 **Funding**

9 This research was made possible by a grant from the Queen Elizabeth Diamond Jubilee  
10 Trust, United Kingdom, coordinated through the Commonwealth Eye health Consortium, UK.  
11 Grant number EM0DXN1M6. The funding organisations had no role in the design and  
12 conduct of the research.  
13  
14  
15  
16

### 17 **Acknowledgements**

18 We acknowledge the support of David MacCleod, Statistician at the LSHTM for guidance in  
19 developing the Delphi questionnaire and Renee du Toit, independent eye health consultant,  
20 South Africa for her input into the analysis of the Delphi questionnaire.  
21  
22  
23  
24  
25  
26  
27  
28

### 29 **REFERENCES**

- 30  
31  
32 1. International Agency for the Prevention of Blindness. Vision Atlas. <http://atlasiapborg/>.  
33 2016(24th November 2017  
34 23rd April 2019).  
35  
36 2. Bourne RR, Flaxman SR, Braithwaite T, Cicinelli MV, Das A, Jonas JB, et al. Magnitude,  
37 temporal trends, and projections of the global prevalence of blindness and distance and near vision  
38 impairment: a systematic review and meta-analysis. *The Lancet Global Health*. 2017;5(9):e888-e97.  
39  
40 3. Gray Z, Ackland P. Cataract surgical coverage. An important indicator for eye health and for  
41 monitoring progress towards universal health coverage. International Agency for the Prevention of  
42 Blindness; 2015. 2015.  
43  
44 4. Kimani K, Lindfield R, Senyonjo L, Mwaniki A, Schmidt E. Prevalence and causes of ocular  
45 morbidity in Mbeere District, Kenya. Results of a population-based survey. *PLoS One*.  
46 2013;8(8):e70009.  
47  
48 5. Senyonjo L, Lindfield R, Mahmoud A, Kimani K, Sanda S, Schmidt E. Ocular Morbidity and  
49 Health Seeking Behaviour in Kwara State, Nigeria: Implications for Delivery of Eye Care Services. *PloS*  
50 *One*. 2014;9(8):e104128.  
51  
52 6. Murthy G, Raman U. Perspectives on primary eye care. *COMMUNITY EyE HEALTH JOURNAL*.  
53 2009;22(69).  
54  
55 7. Andriamanjato HH, Mathenge W, Kalua K, Courtright P, Lewallen S. Task shifting in primary  
56 eye care: how sensitive and specific are common signs and symptoms to predict conditions requiring  
57 referral to specialist eye personnel. *Human Resources for Health*. 2014;12(Suppl 1):S3.  
58  
59 8. Graham R. Facing the crisis in human resources for eye health in sub-Saharan Africa.  
60 *Community eye health*. 2017;30(100):85.  
9. Aghaji AE, Gilbert C, Ihebuzor N, Faal H. Strengths, challenges and opportunities of  
implementing primary eye care in Nigeria. *BMJ global health*. 2018;3(6):e000846.



10. World Health Organization. Universal eye health: a global action plan 2014–2019 <http://www.who.int/blindness>. AP2014\_19\_English pdf. 2013.
11. Courtright P, Seneadza A, Mathenge W, Eliah E, Lewallen S. Primary eye care in sub-Saharan African: do we have the evidence needed to scale up training and service delivery? *Annals of tropical medicine and parasitology*. 2010;104(5):361-7.
12. World Health Organisation. Report of the Expert Group Meeting to Assess and Validate a Package for Eye Health Interventions at the Primary Level for the African Region. 2012.
13. World Health Organisation Africa Region. Primary Eye Care Training Manual-A course to strengthen the capacity of health personnel to manage eye patients at primary-level health facilities in the African Region. Brazzaville: World Health Organization. Regional Office for Africa 2018. p. <https://www.afro.who.int/publications/primary-eye-care-training-manual>.
14. Tesema AG, Ajisegiri WS, Abimbola S, Balane C, Kengne AP, Shiferaw F, et al. How well are non-communicable disease services being integrated into primary health care in Africa: A review of progress against World Health Organization's African regional targets. *PLoS One*. 2020;15(10):e0240984.
15. Snowdon W, Lawrence M, Schultz J, Vivili P, Swinburn B. Evidence-informed process to identify policies that will promote a healthy food environment in the Pacific Islands. *Public health nutrition*. 2010;13(06):886-92.
16. Gericke CA, Kurowski C, Ranson MK, Mills A. Intervention complexity: a conceptual framework to inform priority-setting in health. *Bulletin of the World Health Organization*. 2005;83(4):285-93.
17. Hsu C-C, Sandford BA. The Delphi technique: making sense of consensus. *Practical assessment, research & evaluation*. 2007;12(10):1-8.
18. Skulmoski GJ, Hartman FT, Krahn J. The Delphi method for graduate research. *Journal of Information Technology Education: Research*. 2007;6(1):1-21.
19. Wu F, Khlangwiset P. Evaluating the technical feasibility of aflatoxin risk reduction strategies in Africa. *Food Additives and Contaminants*. 2010;27(5):658-76.
20. Du Toit R, Faal HB, Etya'ale D, Wiafe B, Mason I, Graham R, et al. Evidence for integrating eye health into primary health care in Africa: a health systems strengthening approach. *BMC health services research*. 2013;13(1):102.
21. Dudovskiy J. Snowballing. <https://research-methodology.net/sampling-in-primary-data-collection/snowball-sampling/> 2019; Accessed 23rd January 2019.
22. Hsu C-C, Sandford BA. The Delphi technique: making sense of consensus. *Practical Assessment, Research, and Evaluation*. 2007;12(1):10.
23. Guan L, Gao P, Liu S, Liu Y, Li X, Liu F, et al. Development of a global health bachelor curriculum in China: a Delphi study. *BMJ open*. 2019;9(1).
24. World Health Organization. Everybody's business--strengthening health systems to improve health outcomes: WHO's framework for action. 2007.
25. Bright T, Kuper H, Macleod D, Musendo D, Irunga P, Yip JL. Population need for primary eye care in Rwanda: A national survey. *PloS one*. 2018;13(5):e0193817.
26. Lilian RR, Railton J, Schaftenaar E, Mabitsi M, Grobbelaar CJ, Khosa NS, et al. Strengthening primary eye care in South Africa: An assessment of services and prospective evaluation of a health systems support package. *PloS one*. 2018;13(5):e0197432.
27. World Health Organization. State of health financing in the African Region. 2013.
28. Topp SM, Abimbola S, Joshi R, Negin J. How to assess and prepare health systems in low-and middle-income countries for integration of services—a systematic review. *Health policy and planning*. 2017;33(2):298-312.
29. Blanchet K, Gilbert C, de Savigny D. Rethinking eye health systems to achieve universal coverage: the role of research. *The British journal of ophthalmology*. 2014;98(10):1325-8.

- 1  
2  
3 30. Chol C, Negin J, Garcia-Basteiro A, Gebrehiwot TG, Debru B, Chimpolo M, et al. Health  
4 system reforms in five sub-Saharan African countries that experienced major armed conflicts (wars)  
5 during 1990–2015: a literature review. *Global health action*. 2018;11(1):1517931.  
6  
7 31. Müller A, Murenzi J, Mathenge W, Munana J, Courtright P. Primary eye care in Rwanda:  
8 gender of service providers and other factors associated with effective service delivery. *Tropical*  
9 *Medicine & International Health*. 2010;15(5):529-33.  
10 32. Adekoya B, Ayanniyi A, Adepoju F, Omolase C, Owoeye J. Minimising corneal scarring from  
11 the use of harmful traditional eye remedies in developing countries. *Nigerian quarterly journal of*  
12 *hospital medicine*. 2012;22(2):138-41.  
13 33. Blanchet K, Lindfield R. Health Systems and eye care: A way forward. IAPB Briefing Papers.  
14 2010.  
15 34. Shah K, Naidoo K, Loughman J. Development of socially responsive competency frameworks  
16 for ophthalmic technicians and optometrists in Mozambique. *Clinical and Experimental Optometry*.  
17 2016;99(2):173-82.  
18 35. Hohmann E, Brand JC, Rossi MJ, Lubowitz JH. Expert opinion is necessary: Delphi panel  
19 methodology facilitates a scientific approach to consensus. Elsevier; 2018.  
20 36. Rowe AK, De Savigny D, Lanata CF, Victora CG. How can we achieve and maintain high-  
21 quality performance of health workers in low-resource settings? *The Lancet*. 2005;366(9490):1026-  
22 35.  
23 37. World Health Organization. Decision-making for guideline development at WHO. 2014. In:  
24 WHO handbook for guideline development [Internet]. Geneva: World Health Organization. 2nd.  
25 [201-14].  
26 38. Ferri CP, Prince M, Brayne C, Brodaty H, Fratiglioni L, Ganguli M, et al. Global prevalence of  
27 dementia: a Delphi consensus study. *The lancet*. 2005;366(9503):2112-7.  
28  
29  
30  
31  
32  
33  
34  
35  
36  
37  
38  
39  
40  
41  
42  
43  
44  
45  
46  
47  
48  
49  
50  
51  
52  
53  
54  
55  
56  
57  
58  
59  
60

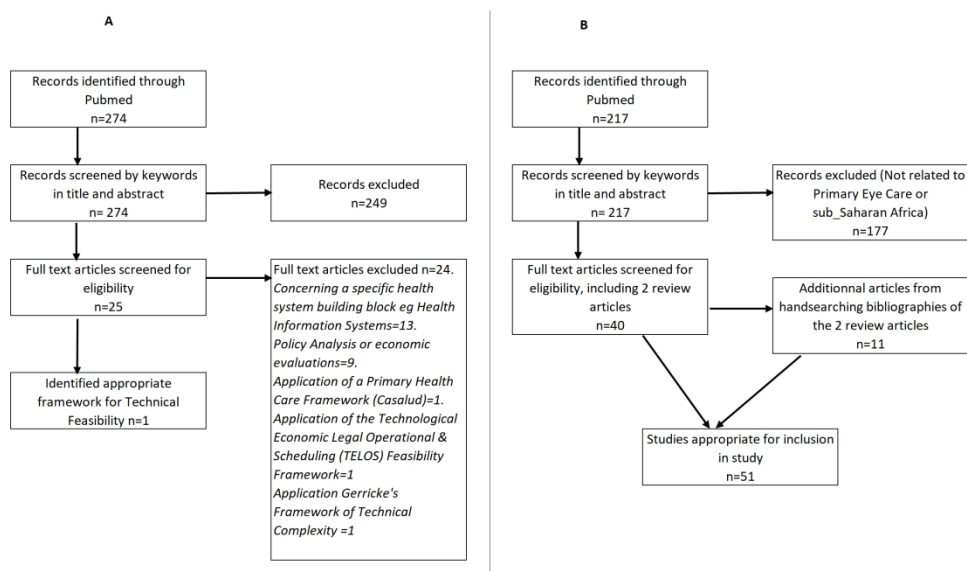

Figure 1 Literature searches for (A) Technical Feasibility Framework and (B) Primary Eye Care in sub-Saharan Africa.

Figure 1. Literature searches for A, technical feasibility framework, and B primary eye care in sub-Saharan Africa.

Appendix 1

Search Strategy for Technical Feasibility Frameworks

| Search number | Query                                                                                                  | Filters                   | Search Details                                                                                                                                                                                                                                                                                                                                                         | Results |
|---------------|--------------------------------------------------------------------------------------------------------|---------------------------|------------------------------------------------------------------------------------------------------------------------------------------------------------------------------------------------------------------------------------------------------------------------------------------------------------------------------------------------------------------------|---------|
| 3             | (technical feasibility AND (2000/1/1:2018/4/30[pdat])) AND (framework* AND (2000/1/1:2018/4/30[pdat])) | from 2000/1/1 - 2018/4/30 | ("technical"[All Fields] OR "technicalities"[All Fields] OR "technicality"[All Fields] OR "technically"[All Fields]) AND ("feasibilities"[All Fields] OR "feasibility"[All Fields] OR "feasible"[All Fields] OR "feasibility"[All Fields]) AND 2000/01/01:2018/04/30[Date - Publication] AND ("framework*" [All Fields] AND 2000/01/01:2018/04/30[Date - Publication]) | 274     |
| 2             | framework*                                                                                             | from 2000/1/1 - 2018/4/30 | "framework*" [All Fields]                                                                                                                                                                                                                                                                                                                                              | 192,596 |
| 1             | technical feasibility                                                                                  | from 2000/1/1 - 2018/4/30 | ("technical"[All Fields] OR "technicalities"[All Fields] OR "technicality"[All Fields] OR "technically"[All Fields]) AND ("feasibilities"[All Fields] OR "feasibility"[All Fields] OR "feasible"[All Fields] OR "feasibility"[All Fields])                                                                                                                             | 16,587  |

## Search Strategy for Primary Eye Care in sub-Saharan Africa

| Search number | Query                                                                                                                                                                                                                                                                                                                                                                                                                                                           | Filters                                    | Search Details                                                                                                                                                                                                                                                                                                                                                                                                                                                                                                                                                                                                                                                                                                                                                                                                                                                                                                                                                                                                                                                                                                                                                                                                                                                                                                                           | Results |
|---------------|-----------------------------------------------------------------------------------------------------------------------------------------------------------------------------------------------------------------------------------------------------------------------------------------------------------------------------------------------------------------------------------------------------------------------------------------------------------------|--------------------------------------------|------------------------------------------------------------------------------------------------------------------------------------------------------------------------------------------------------------------------------------------------------------------------------------------------------------------------------------------------------------------------------------------------------------------------------------------------------------------------------------------------------------------------------------------------------------------------------------------------------------------------------------------------------------------------------------------------------------------------------------------------------------------------------------------------------------------------------------------------------------------------------------------------------------------------------------------------------------------------------------------------------------------------------------------------------------------------------------------------------------------------------------------------------------------------------------------------------------------------------------------------------------------------------------------------------------------------------------------|---------|
| 5             | ((("primary eye care" AND ((humans[Filter]) AND (1980/1/1:2018/4/30[mdat]) AND (english[Filter]))) OR ((eye disease) AND (primary healthcare) AND ((humans[Filter]) AND (1980/1/1:2018/4/30[mdat]) AND (english[Filter]))) OR ((eye) AND (primary healthcare) AND ((humans[Filter]) AND (1980/1/1:2018/4/30[mdat]) AND (english[Filter]))) AND ((Africa) OR ("sub-Saharan Africa") AND ((humans[Filter]) AND (1980/1/1:2018/4/30[mdat]) AND (english[Filter]))) | Humans, English, from 1980/1/1 - 2018/4/30 | ((("primary eye care"[All Fields] AND ("humans"[MeSH Terms] AND 1980/01/01:2018/04/30[Date - Publication] AND "english"[Language])) OR (("eye diseases"[MeSH Terms] OR "eye"[All Fields] AND "diseases"[All Fields]) OR "eye diseases"[All Fields] OR ("eye"[All Fields] AND "disease"[All Fields]) OR "eye disease"[All Fields]) AND ("primary health care"[MeSH Terms] OR ("primary"[All Fields] AND "health"[All Fields] AND "care"[All Fields]) OR "primary health care"[All Fields] OR ("primary"[All Fields] AND "healthcare"[All Fields]) OR "primary healthcare"[All Fields]) AND ("humans"[MeSH Terms] AND 1980/01/01:2018/04/30[Date - Publication] AND "english"[Language])) OR (("eye"[MeSH Terms] OR "eye"[All Fields]) AND ("primary health care"[MeSH Terms] OR ("primary"[All Fields] AND "health"[All Fields] AND "care"[All Fields]) OR "primary health care"[All Fields] OR ("primary"[All Fields] AND "healthcare"[All Fields]) OR "primary healthcare"[All Fields]) AND ("humans"[MeSH Terms] AND 1980/01/01:2018/04/30[Date - Publication] AND "english"[Language]))) AND (("africa"[MeSH Terms] OR "africa"[All Fields] OR "africa s"[All Fields] OR "africas"[All Fields] OR "sub-Saharan Africa"[All Fields]) AND ("humans"[MeSH Terms] AND 1980/01/01:2018/04/30[Date - Publication] AND "english"[Language])) | 217     |
| 4             | (Africa) OR ("sub-Saharan Africa")                                                                                                                                                                                                                                                                                                                                                                                                                              | Humans, English, from 1980/1/1 - 2018/4/30 | "africa"[MeSH Terms] OR "africa"[All Fields] OR "africa s"[All Fields] OR "africas"[All Fields] OR "sub-Saharan Africa"[All Fields]                                                                                                                                                                                                                                                                                                                                                                                                                                                                                                                                                                                                                                                                                                                                                                                                                                                                                                                                                                                                                                                                                                                                                                                                      | 194,607 |
| 3             | (eye) AND (primary healthcare)                                                                                                                                                                                                                                                                                                                                                                                                                                  | Humans, English, from 1980/1/1 - 2018/4/30 | ("eye"[MeSH Terms] OR "eye"[All Fields]) AND ("primary health care"[MeSH Terms] OR ("primary"[All Fields] AND "health"[All Fields] AND "care"[All Fields]) OR "primary health care"[All Fields] OR ("primary"[All Fields] AND "healthcare"[All Fields]) OR "primary healthcare"[All Fields])                                                                                                                                                                                                                                                                                                                                                                                                                                                                                                                                                                                                                                                                                                                                                                                                                                                                                                                                                                                                                                             | 2,330   |
| 2             | (eye disease) AND (primary healthcare)                                                                                                                                                                                                                                                                                                                                                                                                                          | Humans, English, from 1980/1/1 - 2018/4/30 | ("eye diseases"[MeSH Terms] OR ("eye"[All Fields] AND "diseases"[All Fields]) OR "eye diseases"[All Fields] OR ("eye"[All Fields] AND "disease"[All Fields]) OR "eye disease"[All Fields]) AND ("primary health care"[MeSH Terms] OR ("primary"[All Fields] AND "health"[All Fields] AND "care"[All Fields]) OR "primary health care"[All Fields] OR ("primary"[All Fields] AND "healthcare"[All Fields]) OR "primary healthcare"[All Fields])                                                                                                                                                                                                                                                                                                                                                                                                                                                                                                                                                                                                                                                                                                                                                                                                                                                                                           | 2,635   |
| 1             | "primary eye care"                                                                                                                                                                                                                                                                                                                                                                                                                                              | Humans, English, from 1980/1/1 - 2018/4/30 | "primary eye care"[All Fields]                                                                                                                                                                                                                                                                                                                                                                                                                                                                                                                                                                                                                                                                                                                                                                                                                                                                                                                                                                                                                                                                                                                                                                                                                                                                                                           | 192     |

## Appendix 2

## Delphi Round 1 Health Promotion

## Technical Complexity of community based interventions which comprises health promotion and prevention

Health promotion includes health messages for healthy people; health prevention comprises health messages for people at risk for eye diseases targeting children and their carers, those aged 40 years and above, people of all ages and those with diabetes.

| Category                         | Criteria                                                                                                                                                                           | Technical Complexity<br>(Elements that need to be addressed)                                                                                                                                                                                        | Strongly Agree |      | Agree |      | Disagree |      | Strongly disagree |      |
|----------------------------------|------------------------------------------------------------------------------------------------------------------------------------------------------------------------------------|-----------------------------------------------------------------------------------------------------------------------------------------------------------------------------------------------------------------------------------------------------|----------------|------|-------|------|----------|------|-------------------|------|
|                                  |                                                                                                                                                                                    |                                                                                                                                                                                                                                                     | n              | %    | n     | %    | n        | %    | n                 | %    |
| Intervention characteristics     | Stability: usable lifetime and risk of destruction                                                                                                                                 | Posters for health Prevention and promotion are needed.                                                                                                                                                                                             | 7              | 77.8 | 2     | 22.2 | 0        | 0    | 0                 | 0.0  |
|                                  |                                                                                                                                                                                    | Posters should be made durable by lamination.                                                                                                                                                                                                       | 5              | 55.6 | 2     | 22.2 | 2        | 22.2 | 0                 | 0.0  |
|                                  | Standardizability: the degree to which an intervention can be standardized                                                                                                         | The Posters should be standardised by having the same message per target group.                                                                                                                                                                     | 6              | 66.7 | 3     | 33.3 | 0        | 0    | 0                 | 0.0  |
|                                  |                                                                                                                                                                                    | This should be translated into the language of the community as is done for other health promotion posters.                                                                                                                                         | 7              | 77.8 | 2     | 22.2 | 0        | 0    | 0                 | 0.0  |
| Basic product design             | Safety profile of the intervention in terms of adverse effects, and risks associated with inappropriate use, e.g. from over-the-counter sales of prescription-only medications.    | No risk of serious side effects.                                                                                                                                                                                                                    | 5              | 55.6 | 1     | 11.1 | 2        | 22.2 | 1                 | 11.1 |
|                                  |                                                                                                                                                                                    | Messages should be clear, unambiguous and understandable displaying appropriate information.                                                                                                                                                        | 8              | 88.9 | 1     | 11.1 | 0        | 0    | 0                 | 0.0  |
|                                  | Ease of storage e.g. the need for refrigeration. Ease of transport                                                                                                                 | Health promotion materials do not have any specific requirements for storage and transportation.                                                                                                                                                    | 4              | 44.4 | 4     | 44.4 | 1        | 11.1 | 0                 | 0.0  |
| Supplies                         | Need for regular supplies, and the number and types of different supplies needed. Ease of acquisition.                                                                             | No requirements for regular supplies.                                                                                                                                                                                                               | 2              | 22.2 | 6     | 66.7 | 1        | 11.1 | 0                 | 0.0  |
|                                  |                                                                                                                                                                                    | Different types of posters are be needed for different target groups, e.g. diabetics, the elderly, carers of young children.                                                                                                                        | 7              | 77.8 | 2     | 22.2 | 0        | 0    | 0                 | 0.0  |
| Equipment                        | High-technology equipment and infrastructure needed. Ease of acquisition.                                                                                                          | High technological equipment not required.                                                                                                                                                                                                          | 4              | 44.4 | 4     | 44.4 | 1        | 11.1 | 0                 | 0.0  |
|                                  |                                                                                                                                                                                    | Number of different types of equipment needed. Maintenance needed.                                                                                                                                                                                  | 6              | 66.7 | 3     | 33.3 | 0        | 0    | 0                 | 0.0  |
| Delivery characteristics         |                                                                                                                                                                                    | Health promotion materials relatively easy to acquire.                                                                                                                                                                                              | 3              | 33.3 | 4     | 44.4 | 2        | 22.2 | 0                 | 0.0  |
|                                  |                                                                                                                                                                                    |                                                                                                                                                                                                                                                     |                |      |       |      |          |      |                   |      |
| Facilities                       | Retail sector, Outreach services, First-level care, Hospital care                                                                                                                  | Should be delivered in the community through outreach services for diabetics, carers of young children during maternal and child health activities.                                                                                                 | 3              | 33.3 | 4     | 44.4 | 2        | 22.2 | 0                 | 0.0  |
|                                  |                                                                                                                                                                                    | Should be delivered to specific <b>groups</b> that attend the primary health facility e.g. people over 40 years,                                                                                                                                    | 4              | 44.4 | 1     | 11.1 | 4        | 44.4 | 0                 | 0.0  |
|                                  | Skill level required for service provision                                                                                                                                         | Should be delivered to specific <b>people</b> that attend the primary health facility e.g. people over 40 years,                                                                                                                                    | 4              | 44.4 | 1     | 11.1 | 3        | 33.3 | 1                 | 11.1 |
|                                  |                                                                                                                                                                                    | Low skill requirement.                                                                                                                                                                                                                              | 2              | 22.2 | 3     | 33.3 | 1        | 11.1 | 3                 | 33.3 |
| Human resources                  |                                                                                                                                                                                    | Will require knowledge about community, eye diseases and where to access care.                                                                                                                                                                      | 6              | 66.7 | 2     | 22.2 | 1        | 11.1 | 0                 | 0.0  |
|                                  |                                                                                                                                                                                    | Village Health Workers who live in the community should be trained to deliver health promotion in the communities.                                                                                                                                  | 6              | 66.7 | 3     | 33.3 | 0        | 0    | 0                 | 0.0  |
|                                  |                                                                                                                                                                                    | Facility based workers should deliver health prevention to groups/individuals in the facility.                                                                                                                                                      | 2              | 22.2 | 6     | 66.7 | 1        | 11.1 | 0                 | 0.0  |
|                                  | Skill level required for staff supervision. Degree of supervision required.                                                                                                        | Development of the health promotion materials and staff training will require professional instruction.                                                                                                                                             | 5              | 55.6 | 4     | 44.4 | 0        | 0    | 0                 | 0.0  |
|                                  |                                                                                                                                                                                    | Mid-level skill required to supervise health promotion/prevention activities.                                                                                                                                                                       | 3              | 33.3 | 5     | 55.6 | 0        | 0    | 0                 | 0.0  |
|                                  |                                                                                                                                                                                    | Health Promotion and prevention activities should be delivered on schedule.                                                                                                                                                                         | 6              | 66.7 | 3     | 33.3 | 0        | 0    | 0                 | 0.0  |
| Communication and transport      | Need for managerial staff: Management and planning requirements.                                                                                                                   | Planning will be required to organise target audience to be sensitised in appropriate locations e.g. Mothers or care givers of young children.                                                                                                      | 7              | 77.8 | 2     | 22.2 | 0        | 0    | 0                 | 0.0  |
|                                  |                                                                                                                                                                                    | Dependence of delivery on communication and transport infrastructure: roads, telephones, need for substantial exchange of information between different sectors or levels of care.                                                                  | 4              | 44.4 | 3     | 33.3 | 2        | 22.2 | 0                 | 0.0  |
|                                  | Communication between the communities and the Front Line Health Facilities required.                                                                                               | Communication between the communities and the Front Line Health Facilities required.                                                                                                                                                                | 7              | 77.8 | 2     | 22.2 | 0        | 0    | 0                 | 0.0  |
|                                  |                                                                                                                                                                                    | Communication in local language required.                                                                                                                                                                                                           | 7              | 77.8 | 2     | 22.2 | 0        | 0    | 0                 | 0.0  |
| Government capacity requirements |                                                                                                                                                                                    |                                                                                                                                                                                                                                                     |                |      |       |      |          |      |                   |      |
| Regulation/legislation           | Need for legislation/regulation, monitoring regulatory measures. Need for enforcement of regulation.                                                                               | No special legislation required.                                                                                                                                                                                                                    | 3              | 33.3 | 3     | 33.3 | 1        | 11.1 | 2                 | 22.2 |
|                                  |                                                                                                                                                                                    | A national prevention of blindness strategy will be ideal as is advocated in the Global Action Plan.                                                                                                                                                | 7              | 77.8 | 2     | 22.2 | 0        | 0    | 0                 | 0.0  |
| Management systems               | Need for sophisticated management systems. Need for managerial staff. Level of management and planning requirements.                                                               | No need for sophisticated management systems.                                                                                                                                                                                                       | 2              | 22.2 | 6     | 66.7 | 1        | 11.1 | 0                 | 0.0  |
|                                  |                                                                                                                                                                                    | Health Promotion logistics should be managed by managerial structure at frontline health facilities.                                                                                                                                                | 5              | 55.6 | 2     | 22.2 | 1        | 11.1 | 1                 | 11.1 |
| Collaborative action             | Need for inter-sectoral action within government. Need for partnership between government and civil society. Need for partnership between government and external funding agencies | There is need for intersectoral action within government in trachoma endemic areas to implement water sanitation and hygiene programmes.                                                                                                            | 8              | 88.9 | 1     | 11.1 | 0        | 0    | 0                 | 0.0  |
|                                  |                                                                                                                                                                                    | Eye health promotion could be effectively done in schools.                                                                                                                                                                                          | 6              | 66.7 | 3     | 33.3 | 0        | 0    | 0                 | 0.0  |
|                                  |                                                                                                                                                                                    | Health Promotion will require collaboration with NGOs.                                                                                                                                                                                              | 4              | 44.4 | 4     | 44.4 | 1        | 11.1 | 0                 | 0.0  |
| Usage characteristics            | Need for information and education                                                                                                                                                 | Collaboration between communities and Front Line Health Facilities is required.                                                                                                                                                                     | 7              | 77.8 | 2     | 22.2 | 0        | 0    | 0                 | 0.0  |
|                                  |                                                                                                                                                                                    |                                                                                                                                                                                                                                                     |                |      |       |      |          |      |                   |      |
| Ease of use                      | Need for supervision                                                                                                                                                               | Information and education of the target population in the community is necessary.                                                                                                                                                                   | 7              | 77.8 | 1     | 11.1 | 1        | 11.1 | 0                 | 0.0  |
|                                  |                                                                                                                                                                                    | Supervision of the Village Health Workers is important.                                                                                                                                                                                             | 8              | 88.9 | 1     | 11.1 | 0        | 0    | 0                 | 0.0  |
| Pre-existing demand              | Need for promotion                                                                                                                                                                 | The burden of ocular morbidity/BL/V1 has been established in many setting in LMICs, but the demand for eye care services is low. Significant level of health promotion needed.                                                                      | 7              | 77.8 | 1     | 11.1 | 1        | 11.1 | 0                 | 0.0  |
| Black market risk                | Need to prevent resale/counterfeiting                                                                                                                                              | In some communities, itinerant couchers and traditional healers may compete with orthodox eye care practitioners for the patients. Need to limit harmful practices of traditional eye healers by engaging them in eye health prevention activities. | 4              | 44.4 | 4     | 44.4 | 1        | 11.1 | 0                 | 0.0  |

Delphi Round 1 Facility Case Management

Technical Complexity of facility-based intervention

| Category                                                         | Criteria                                                                                                                                  | Technical Complexity (elements that need to be addressed)                                                                                                                    | Strongly Agree                                                                                                                                                        |      | Agree |      | Disagree |      | Strongly disagree |      |     |
|------------------------------------------------------------------|-------------------------------------------------------------------------------------------------------------------------------------------|------------------------------------------------------------------------------------------------------------------------------------------------------------------------------|-----------------------------------------------------------------------------------------------------------------------------------------------------------------------|------|-------|------|----------|------|-------------------|------|-----|
|                                                                  |                                                                                                                                           |                                                                                                                                                                              | n                                                                                                                                                                     | %    | n     | %    | n        | %    | n                 | %    |     |
| Intervention characteristics                                     |                                                                                                                                           | Batteries for torches are not stable in hot climates. Will require frequent replacement.                                                                                     | 1                                                                                                                                                                     | 11.1 | 2     | 22.2 | 5        | 55.6 | 2                 | 22.2 |     |
|                                                                  |                                                                                                                                           | Eye drops will require cool storage.                                                                                                                                         | 1                                                                                                                                                                     | 11.1 | 5     | 55.6 | 2        | 22.2 | 1                 | 11.1 |     |
|                                                                  | Stability/ease of storage/ease of transport                                                                                               | Tetanus toxoid will require cold storage (refrigeration)                                                                                                                     | 6                                                                                                                                                                     | 66.7 | 1     | 11.1 | 1        | 11.1 | 0                 | 0.0  |     |
|                                                                  |                                                                                                                                           | Topical antibiotic ointment does not need cold storage                                                                                                                       | 4                                                                                                                                                                     | 44.4 | 4     | 44.4 | 1        | 11.1 | 0                 | 0.0  |     |
| Basic product design                                             | Standardizability                                                                                                                         | Injectable antibiotics for ophthalmia neonatorum will require cold storage                                                                                                   | 2                                                                                                                                                                     | 22.2 | 4     | 44.4 | 1        | 11.1 | 1                 | 11.1 |     |
|                                                                  |                                                                                                                                           | Sterile saline solution for eye irrigation is needed and is stable                                                                                                           | 6                                                                                                                                                                     | 66.7 | 3     | 33.3 | 0        | 0    | 0                 | 0.0  |     |
|                                                                  | Safety profile                                                                                                                            | High dose vitamin A is needed and is stable                                                                                                                                  | 4                                                                                                                                                                     | 44.4 | 5     | 55.6 | 0        | 0    | 0                 | 0.0  |     |
|                                                                  |                                                                                                                                           | All the above consumables will be transported by pre existing PHC transport channels                                                                                         | 8                                                                                                                                                                     | 88.9 | 1     | 11.1 | 0        | 0    | 0                 | 0.0  |     |
|                                                                  |                                                                                                                                           | The WHO AFROC PEC package as 5 algorithms for facility-based care with 12 protocols and 7 standards. Hence the intervention is standardized.                                 | 6                                                                                                                                                                     | 66.7 | 3     | 33.3 | 0        | 0    | 0                 | 0.0  |     |
|                                                                  |                                                                                                                                           | None of the products cause any harm, if delivered correctly                                                                                                                  | 4                                                                                                                                                                     | 44.4 | 4     | 44.4 | 1        | 11.1 | 0                 | 0.0  |     |
| Supplies                                                         | Need for regular supplies                                                                                                                 | Regular supplies of eye medication are needed.                                                                                                                               | 8                                                                                                                                                                     | 88.9 | 1     | 11.1 | 0        | 0    | 0                 | 0.0  |     |
|                                                                  | High-technology equipment and infrastructure needed                                                                                       | Diagnostic equipment needed: Snellen distance visual acuity chart; near visual acuity chart, torches and batteries.                                                          | 6                                                                                                                                                                     | 66.7 | 3     | 33.3 | 0        | 0    | 0                 | 0.0  |     |
| Equipment                                                        | Infrastructure                                                                                                                            | 6m distance to measure visual acuity.                                                                                                                                        | 1                                                                                                                                                                     | 11.1 | 4     | 44.4 | 3        | 33.3 | 1                 | 11.1 |     |
|                                                                  |                                                                                                                                           | Space for counselling required.                                                                                                                                              | 4                                                                                                                                                                     | 44.4 | 5     | 55.6 | 0        | 0    | 0                 | 0.0  |     |
|                                                                  | Number of different types of equipment needed                                                                                             | One set of diagnostic equipment per facility is needed                                                                                                                       | 3                                                                                                                                                                     | 33.3 | 5     | 55.6 | 1        | 11.1 | 0                 | 0.0  |     |
|                                                                  | Maintenance needed                                                                                                                        | Torch batteries will need to be changed.                                                                                                                                     | 2                                                                                                                                                                     | 22.2 | 5     | 55.6 | 0        | 0    | 1                 | 11.1 |     |
| Delivery characteristics                                         |                                                                                                                                           |                                                                                                                                                                              | Strongly Agree                                                                                                                                                        |      | Agree |      | Disagree |      | Strongly disagree |      |     |
|                                                                  |                                                                                                                                           |                                                                                                                                                                              | n                                                                                                                                                                     | %    | n     | %    | n        | %    | n                 | %    |     |
|                                                                  | Retail sector                                                                                                                             | Not applicable                                                                                                                                                               | 0                                                                                                                                                                     | 0    | 1     | 11.1 | 6        | 66.7 | 2                 | 22.2 |     |
|                                                                  | Outreach services                                                                                                                         | None (see health promotion framework)                                                                                                                                        | 1                                                                                                                                                                     | 11.1 | 0     | 0.0  | 5        | 55.6 | 3                 | 33.3 |     |
|                                                                  | First-level care                                                                                                                          | Diagnoses of management of uncomplicated cases can be delivered in Primary Health Centres and Health Posts.                                                                  | 5                                                                                                                                                                     | 55.6 | 4     | 44.4 | 0        | 0    | 0                 | 0.0  |     |
|                                                                  | Hospital care                                                                                                                             | Hospital services are needed for referrals, severe cases and treatment failures, further investigations and management, as required.                                         | 7                                                                                                                                                                     | 77.8 | 2     | 22.2 | 0        | 0    | 0                 | 0.0  |     |
|                                                                  |                                                                                                                                           | Mid-level skill is required to make a diagnosis (eliciting a history; measuring visual acuity; basic eye examination)                                                        | 7                                                                                                                                                                     | 77.8 | 1     | 11.1 | 0        | 0    | 0                 | 0.0  |     |
|                                                                  | Skill level required for service provision                                                                                                | Mid-level skill is required for management of some conditions e.g., eye irrigation; removal of foreign bodies; giving intramuscular injections (tetanus toxoid; antibiotics) | 5                                                                                                                                                                     | 55.6 | 2     | 22.2 | 0        | 0    | 1                 | 11.1 |     |
|                                                                  |                                                                                                                                           | Mid-level skill is required for identifying which cases to refer and the level of urgency                                                                                    | 5                                                                                                                                                                     | 55.6 | 2     | 22.2 | 0        | 0    | 0                 | 0.0  |     |
|                                                                  | Skill level required for staff supervision. Degree of supervision required.                                                               | Primary Health Care supervisors need a good level of knowledge of eye conditions and their management and be skilled in the above. activity needed.                          | 5                                                                                                                                                                     | 55.6 | 3     | 33.3 | 0        | 0    | 1                 | 11.1 |     |
| Regular supervision of PEC required.                             |                                                                                                                                           | 8                                                                                                                                                                            | 88.9                                                                                                                                                                  | 1    | 11.1  | 0    | 0        | 0    | 0.0               |      |     |
| Human resources                                                  | Intensity of professional services in terms of frequency or duration, e.g. on schedule/periodic or continuous to accommodate emergencies. | Primary Health Care workers trained in eye care should be available continuously to manage emergencies                                                                       | 7                                                                                                                                                                     | 77.8 | 2     | 22.2 | 0        | 0    | 0                 | 0.0  |     |
|                                                                  |                                                                                                                                           | Managerial staff needed to manage supplies of consumables and plan purchasing                                                                                                | 3                                                                                                                                                                     | 33.3 | 5     | 55.6 | 1        | 11.1 | 0                 | 0.0  |     |
|                                                                  | Management and planning requirements. Need for managerial staff                                                                           | Managerial staff needed to establish and maintain referral and feedback mechanisms between the PH centre and eye department/clinic.                                          | 4                                                                                                                                                                     | 44.4 | 2     | 22.2 | 3        | 33.3 | 0                 | 0.0  |     |
|                                                                  |                                                                                                                                           | Managerial systems to coordinate staff rotations to ensure daily facility coverage by trained PEC staff.                                                                     | 5                                                                                                                                                                     | 55.6 | 3     | 33.3 | 1        | 11.1 | 0                 | 0.0  |     |
|                                                                  | Communication and Transport                                                                                                               | Depends on delivery of communication and transport infrastructure                                                                                                            | Depends on communication to establish and maintain referral and feedback mechanisms between PH centres and eye department/clinic. Respond to feedback from referrals. | 7    | 77.8  | 2    | 22.2     | 0    | 0                 | 0    | 0.0 |
| Transportation between PH Centre and referral centre imperative. |                                                                                                                                           |                                                                                                                                                                              | 6                                                                                                                                                                     | 66.7 | 2     | 22.2 | 1        | 11.1 | 0                 | 0.0  |     |
| Government capacity requirements                                 |                                                                                                                                           |                                                                                                                                                                              | Strongly Agree                                                                                                                                                        |      | Agree |      | Disagree |      | Strongly disagree |      |     |
|                                                                  |                                                                                                                                           |                                                                                                                                                                              | n                                                                                                                                                                     | %    | n     | %    | n        | %    | n                 | %    |     |
|                                                                  | Need for regulation.                                                                                                                      | Appropriate medication & equipment need to be on the national essential drug list to facilitate availability.                                                                | 8                                                                                                                                                                     | 88.9 | 1     | 11.1 | 0        | 0    | 0                 | 0.0  |     |
|                                                                  | Regulation/legislation                                                                                                                    | Need for monitoring regulatory measures. Need for enforcement of regulation.                                                                                                 | There is need for regulation of drug prescription and dispensing by appropriate staff.                                                                                | 7    | 77.8  | 2    | 22.2     | 0    | 0                 | 0    | 0.0 |
|                                                                  |                                                                                                                                           | Measles is a notifiable condition and should be reported to appropriate regulatory authorities.                                                                              | 8                                                                                                                                                                     | 88.9 | 0     | 0.0  | 1        | 11.1 | 0                 | 0.0  |     |
|                                                                  | Ophthalmia neonatorum is a notifiable condition and should be reported                                                                    | 6                                                                                                                                                                            | 66.7                                                                                                                                                                  | 1    | 11.1  | 2    | 22.2     | 0    | 0.0               |      |     |
| Management systems                                               | Need for sophisticated management systems                                                                                                 | No need for sophisticated management systems                                                                                                                                 | 2                                                                                                                                                                     | 22.2 | 5     | 55.6 | 2        | 22.2 | 0                 | 0.0  |     |
|                                                                  | Need for inter-sectoral action within government. Need for partnership between government and civil society.                              | Intersectoral action withingovernment or partnerships between government and civil society are desirable but not mandatory.                                                  | 4                                                                                                                                                                     | 44.4 | 4     | 44.4 | 1        | 11.1 | 0                 | 0.0  |     |
| Collaborative action                                             | Need for partnership between government and external funding agencies                                                                     | Need for partnerships between governments and NGOs.                                                                                                                          | 4                                                                                                                                                                     | 44.4 | 5     | 55.6 | 0        | 0    | 0                 | 0.0  |     |
|                                                                  |                                                                                                                                           | NGOs are responsible for the bulk of eye care in LMICs.                                                                                                                      | 2                                                                                                                                                                     | 22.2 | 5     | 55.6 | 2        | 22.2 | 0                 | 0.0  |     |
| Usage characteristics                                            |                                                                                                                                           |                                                                                                                                                                              | Strongly Agree                                                                                                                                                        |      | Agree |      | Disagree |      | Strongly disagree |      |     |
|                                                                  |                                                                                                                                           |                                                                                                                                                                              | n                                                                                                                                                                     | %    | n     | %    | n        | %    | n                 | %    |     |
| Ease of use                                                      | Need for supervision                                                                                                                      | Outcomes of consultation at the PH Centre will be reassurance, treatment (and) or referral. At this level, prescribed treatments may not require supervision at home.        | 3                                                                                                                                                                     | 33.3 | 3     | 33.3 | 3        | 33.3 | 0                 | 0.0  |     |
|                                                                  |                                                                                                                                           | Referrals to secondary centres may require supervision to ensure compliance and may have to be supported.                                                                    | 7                                                                                                                                                                     | 77.8 | 2     | 22.2 | 0        | 0    | 0                 | 0.0  |     |
| Pre-existing demand                                              | Need for promotion                                                                                                                        | The burden of ocular morbidity/BLVI has been established in many setting in LMICs but the demand for eye care services is low. Significant level of health promotion needed. | 7                                                                                                                                                                     | 77.8 | 2     | 22.2 | 0        | 0    | 0                 | 0.0  |     |
| Black market risk                                                | Need to prevent resale/counterfeiting                                                                                                     | Need to limit harmful practices of traditional eye healers by training them to identify and refer eye conditions.                                                            | 6                                                                                                                                                                     | 66.7 | 3     | 33.3 | 0        | 0    | 0                 | 0.0  |     |

## Appendix 3

## Modifications made in the technical complexity requirements after Delphi round 1

| Gericke's Framework Dimensions                                                                                                                               | WHO AFRO PEC Package Component                                                                                                                                                                                                                                                     |                                                                                                                                                                                                                                                                                                                                                                                                                                                        |
|--------------------------------------------------------------------------------------------------------------------------------------------------------------|------------------------------------------------------------------------------------------------------------------------------------------------------------------------------------------------------------------------------------------------------------------------------------|--------------------------------------------------------------------------------------------------------------------------------------------------------------------------------------------------------------------------------------------------------------------------------------------------------------------------------------------------------------------------------------------------------------------------------------------------------|
|                                                                                                                                                              | Health Promotion and Prevention                                                                                                                                                                                                                                                    | Case Facility Management                                                                                                                                                                                                                                                                                                                                                                                                                               |
|                                                                                                                                                              | Statements Modified                                                                                                                                                                                                                                                                |                                                                                                                                                                                                                                                                                                                                                                                                                                                        |
| <b>Intervention Characteristics</b><br><u>Basic Product Design</u><br><br><u>Equipment</u>                                                                   | Community Health Workers should be instructed on the potential side effects of any health Promotion materials.                                                                                                                                                                     | Torches can be solar- powered and are stable.<br><br>Appropriate and secure storage for drugs and consummables should be available.<br><br>Eye drops that do not require cool storage should be stocked.<br><br>Injectable antibiotics for ophthalmia neonatorum may require cool storage but should be available to treat other conditions.<br><br>Adequate space to support the use of appropriate and standardized visual acuity charts.eg 3m or 6m |
| <b>Delivery Characteristics</b><br><u>Type of Facility needed</u><br><br><u>Human Resource Requirement</u><br><u>Communication and Transport</u>             | Availability of community leaders to deliver eye health promotion when required<br><br>Opportunistic eye health promotion can be delivered to groups in the facility<br><br>Opportunistic health promotion can be delivered to individual people in the facility- if time permits. | Existing managerial facility staff should be able to establish and maintain referral and feedback mechanisms between the PH centre                                                                                                                                                                                                                                                                                                                     |
| <b>Government Capacity Requirements</b><br><u>Regulation/Legislation</u><br><br><b>Usage Characteristics</b><br><u>Ease of use&amp; Need for Supervision</u> | Health promotion materials should be approved and endorsed by local regulatory authorities.<br>Eye health promotion activities should be recorded and monitored.                                                                                                                   | Staff who are available to make supervisory home visits.                                                                                                                                                                                                                                                                                                                                                                                               |



Appendix 4

Delphi Round 2 Health Promotion

Technical Capacity for community based interventions which comprises health promotion and prevention

| Category                                                                                                                                                                           | Criteria                                                                                                                                                                           | Technical Complexity<br>(Elements that need to be addressed)                                                                                                                                                                                        | Technical Capacity needed<br>(Elements that need to be available)                                                                                            | Strongly Agree                                                                                                                                                                                                 |      | Agree |      | Disagree |      | Strongly disagree |      |
|------------------------------------------------------------------------------------------------------------------------------------------------------------------------------------|------------------------------------------------------------------------------------------------------------------------------------------------------------------------------------|-----------------------------------------------------------------------------------------------------------------------------------------------------------------------------------------------------------------------------------------------------|--------------------------------------------------------------------------------------------------------------------------------------------------------------|----------------------------------------------------------------------------------------------------------------------------------------------------------------------------------------------------------------|------|-------|------|----------|------|-------------------|------|
|                                                                                                                                                                                    |                                                                                                                                                                                    |                                                                                                                                                                                                                                                     |                                                                                                                                                              | n                                                                                                                                                                                                              | %    | n     | %    | n        | %    | n                 | %    |
| <b>Intervention characteristics</b>                                                                                                                                                | Stability: usable lifetime and risk of destruction                                                                                                                                 | Posters for health Prevention and promotion are needed.                                                                                                                                                                                             | Posters that promote eye health should be available.                                                                                                         | 7                                                                                                                                                                                                              | 77.8 | 2     | 22.2 | 0        | 0    | 0                 | 0    |
|                                                                                                                                                                                    |                                                                                                                                                                                    | Posters should be made durable by lamination.                                                                                                                                                                                                       | The availability of durable posters.                                                                                                                         | 4                                                                                                                                                                                                              | 44.4 | 5     | 55.6 | 0        | 0    | 0                 | 0    |
|                                                                                                                                                                                    | Standardizability: the degree to which an intervention can be standardized                                                                                                         | The Posters should be standardised by having the same message per target group.                                                                                                                                                                     | The availability of standardized posters, delivering the same message per target group.                                                                      | 5                                                                                                                                                                                                              | 55.6 | 4     | 44.4 | 0        | 0    | 0                 | 0    |
|                                                                                                                                                                                    |                                                                                                                                                                                    | This should be translated into the language of the community as is done for other health promotion posters.                                                                                                                                         | Available posters should be in the language of the community.                                                                                                | 6                                                                                                                                                                                                              | 66.7 | 1     | 11.1 | 2        | 22.2 | 0                 | 0    |
|                                                                                                                                                                                    | <b>Basic product design</b>                                                                                                                                                        | Safety profile of the intervention in terms of adverse effects, and risks associated with inappropriate use, e.g. from over-the-counter sales of prescription-only medications.                                                                     | No risk of serious side effects.                                                                                                                             | Community Health Workers should be instructed on the potential dangers, such as fire, of wall posters of any health Promotion materials. Mechanisms for the proper disposal of old posters should be in place. | 3    | 33.3  | 3    | 33.3     | 2    | 22.2              | 1    |
| <b>Supplies</b>                                                                                                                                                                    | Ease of storage e.g. the need for refrigeration. Ease of transport                                                                                                                 | Messages should be clear, unambiguous and understandable displaying appropriate information.                                                                                                                                                        | Posters with self explanatory graphics should be available to accommodate the illiterate.                                                                    | 8                                                                                                                                                                                                              | 88.9 | 1     | 11.1 | 0        | 0    | 0                 | 0    |
|                                                                                                                                                                                    |                                                                                                                                                                                    | Health promotion materials do not have any specific requirements for storage and transportation.                                                                                                                                                    | NA                                                                                                                                                           |                                                                                                                                                                                                                |      |       |      |          |      |                   |      |
|                                                                                                                                                                                    | Need for regular supplies, and the number and types of different supplies needed. Ease of acquisition.                                                                             | No requirements for regular supplies.                                                                                                                                                                                                               | NA                                                                                                                                                           |                                                                                                                                                                                                                |      |       |      |          |      |                   |      |
| <b>Equipment</b>                                                                                                                                                                   | High-technology equipment and infrastructure needed. Ease of acquisition. Number of different types of equipment needed. Maintenance needed.                                       | Different types of posters are be needed for different target groups, e.g. diabetics, the elderly, carers of young children.                                                                                                                        | Availability of different types of posters for different target groups which are appropriately displayed.                                                    | 5                                                                                                                                                                                                              | 55.6 | 3     | 33.3 | 1        | 11.1 | 0                 | 0    |
|                                                                                                                                                                                    |                                                                                                                                                                                    | High technological equipment not required.                                                                                                                                                                                                          | NA                                                                                                                                                           |                                                                                                                                                                                                                |      |       |      |          |      |                   |      |
| <b>Delivery characteristics</b>                                                                                                                                                    | Retail sector, Outreach services, First-level care, Hospital care                                                                                                                  | Low maintenance.                                                                                                                                                                                                                                    | The availability of health promotion materials that are easy to maintain.                                                                                    | 5                                                                                                                                                                                                              | 55.6 | 4     | 44.4 | 0        | 0    | 0                 | 0    |
|                                                                                                                                                                                    |                                                                                                                                                                                    | Health promotion materials relatively easy to acquire.                                                                                                                                                                                              | A system for the easy procurement of health promotion materials.                                                                                             | 6                                                                                                                                                                                                              | 66.7 | 3     | 33.3 | 0        | 0    | 0                 | 0    |
|                                                                                                                                                                                    |                                                                                                                                                                                    |                                                                                                                                                                                                                                                     |                                                                                                                                                              |                                                                                                                                                                                                                |      |       |      |          |      |                   |      |
| <b>Facilities</b>                                                                                                                                                                  | Should be delivered in the community through outreach services for diabetics, carers of young children during maternal and child health activities.                                | Availability of health promotion in the community that includes young children and their carers, diabetics and the elderly as their target audience.                                                                                                | Availability of health promotion in the community that includes young children and their carers, diabetics and the elderly as their target audience.         | 4                                                                                                                                                                                                              | 44.4 | 5     | 55.6 | 0        | 0    | 0                 | 0    |
|                                                                                                                                                                                    |                                                                                                                                                                                    | Availability of community leaders to deliver eye health promotion when required                                                                                                                                                                     | Availability of community leaders to deliver eye health promotion when required                                                                              | 3                                                                                                                                                                                                              | 33.3 | 2     | 22.2 | 3        | 33.3 | 1                 | 11.1 |
|                                                                                                                                                                                    | Should be delivered to specific groups that attend the primary health facility e.g. people over 40 years,                                                                          | The availability of time, space and willingness to deliver opportunistic eye health promotion to groups in the facility                                                                                                                             | 7                                                                                                                                                            | 77.8                                                                                                                                                                                                           | 1    | 11.1  | 1    | 11.1     | 0    | 0                 |      |
|                                                                                                                                                                                    | Should be delivered to specific people that attend the primary health facility e.g. people over 40 years,                                                                          | The availability of time and the willingness to deliver opportunistic eye health promotion to targeted individuals in the facility e.g. diabetics.                                                                                                  | 5                                                                                                                                                            | 55.6                                                                                                                                                                                                           | 2    | 22.2  | 2    | 22.2     | 0    | 0                 |      |
|                                                                                                                                                                                    | Skill level required for service provision                                                                                                                                         | Low skill requirement.                                                                                                                                                                                                                              | Availability of staff skilled in communicating with community members                                                                                        | 7                                                                                                                                                                                                              | 77.8 | 2     | 22.2 | 0        | 0    | 0                 | 0    |
| <b>Human resources</b>                                                                                                                                                             | Will require knowledge about community, eye diseases and where to access care.                                                                                                     | Availability of staff who are knowledgeable about community, eye diseases and where to access care                                                                                                                                                  | Availability of staff who are knowledgeable about community, eye diseases and where to access care                                                           | 7                                                                                                                                                                                                              | 77.8 | 2     | 22.2 | 0        | 0    | 0                 | 0    |
|                                                                                                                                                                                    |                                                                                                                                                                                    | Village Health Workers who live in the community should be trained to deliver health promotion in the communities.                                                                                                                                  | Availability of village health workers resident in the community who are able to deliver health promotion.                                                   | 6                                                                                                                                                                                                              | 66.7 | 3     | 33.3 | 0        | 0    | 0                 | 0    |
|                                                                                                                                                                                    | Facility based workers should deliver health prevention to groups/individuals in the facility.                                                                                     | Facility based staff who are able to deliver health promotion.                                                                                                                                                                                      | 5                                                                                                                                                            | 55.6                                                                                                                                                                                                           | 4    | 44.4  | 0    | 0        | 0    | 0                 |      |
|                                                                                                                                                                                    | Development of the health promotion materials and staff training will require professional instruction.                                                                            | Availability of professionals to train staff on eye health promotion and develop health promotion materials.                                                                                                                                        | 9                                                                                                                                                            | 100                                                                                                                                                                                                            | 0    | 0     | 0    | 0        | 0    | 0                 |      |
|                                                                                                                                                                                    | Skill level required for staff supervision. Degree of supervision required.                                                                                                        | Mid-level skill required to supervise health promotion/prevention activities.                                                                                                                                                                       | Availability of supervisors who are able to supervise health promotion activities including eye health.                                                      | 7                                                                                                                                                                                                              | 77.8 | 2     | 22.2 | 0        | 0    | 0                 | 0    |
| <b>Communication and transport</b>                                                                                                                                                 | Intensity of professional services in terms of frequency or duration e.g. on schedule/periodic or continuous                                                                       | Health Promotion and prevention activities should be delivered on schedule.                                                                                                                                                                         | Availability of staff who regularly deliver health promotion on schedule.                                                                                    | 7                                                                                                                                                                                                              | 77.8 | 2     | 22.2 | 0        | 0    | 0                 | 0    |
|                                                                                                                                                                                    |                                                                                                                                                                                    | Planning will be required to organise target audience to be sensitised in appropriate locations e.g. Mothers or care givers of young children.                                                                                                      | Availability of existing managerial staff who plan and organise target audience to be sensitised in appropriate locations e.g. carers of young children.     | 5                                                                                                                                                                                                              | 55.6 | 4     | 44.4 | 0        | 0    | 0                 | 0    |
|                                                                                                                                                                                    | Need for managerial staff: Management and planning requirements.                                                                                                                   |                                                                                                                                                                                                                                                     |                                                                                                                                                              |                                                                                                                                                                                                                |      |       |      |          |      |                   |      |
| Dependence of delivery on communication and transport infrastructure: roads, telephones, need for substantial exchange of information between different sectors or levels of care. | Local transport infrastructure will be needed to visit communities.                                                                                                                | The availability of local transport infrastructure to visit communities.                                                                                                                                                                            | 6                                                                                                                                                            | 66.7                                                                                                                                                                                                           | 1    | 11.1  | 2    | 22.2     | 0    | 0                 |      |
|                                                                                                                                                                                    | Communication between the communities and the Front Line Health Facilities required.                                                                                               | The availability of appropriate communication channels between the community and frontline health facilities.                                                                                                                                       | 8                                                                                                                                                            | 88.9                                                                                                                                                                                                           | 1    | 11.1  | 0    | 0        | 0    | 0                 |      |
| <b>Government capacity requirements</b>                                                                                                                                            | Communication in local language required.                                                                                                                                          | The availability of staff who are able to communicate in the local language.                                                                                                                                                                        | The availability of staff who are able to communicate in the local language.                                                                                 | 9                                                                                                                                                                                                              | 100  | 0     | 0    | 0        | 0    | 0                 | 0    |
|                                                                                                                                                                                    |                                                                                                                                                                                    |                                                                                                                                                                                                                                                     |                                                                                                                                                              |                                                                                                                                                                                                                |      |       |      |          |      |                   |      |
|                                                                                                                                                                                    | <b>Regulation/legislation</b>                                                                                                                                                      | Need for legislation/regulation, monitoring regulatory measures. Need for enforcement of regulation.                                                                                                                                                | No special legislation required.                                                                                                                             | Health promotion materials which have been approved and endorsed by local regulatory authorities.                                                                                                              | 5    | 55.6  | 3    | 33.3     | 1    | 11.1              | 0    |
| <b>Management systems</b>                                                                                                                                                          | Need for sophisticated management systems. Need for managerial staff. Level of management and planning requirements.                                                               | Eye health promotion activities that are recorded and monitored.                                                                                                                                                                                    | Eye health promotion activities that are recorded and monitored.                                                                                             | 4                                                                                                                                                                                                              | 44.4 | 3     | 33.3 | 1        | 11.1 | 0                 | 0    |
|                                                                                                                                                                                    |                                                                                                                                                                                    | A national prevention of blindness strategy will be ideal as is advocated in the Global Action Plan.                                                                                                                                                | Availability of a national blindness prevention strategy that incorporates eye health promotion.                                                             | 8                                                                                                                                                                                                              | 88.9 | 0     | 0    | 1        | 11.1 | 0                 | 0    |
|                                                                                                                                                                                    | Need for inter-sectoral action within government. Need for partnership between government and civil society. Need for partnership between government and external funding agencies | No need for sophisticated management systems.                                                                                                                                                                                                       | NA                                                                                                                                                           |                                                                                                                                                                                                                |      |       |      |          |      |                   |      |
| <b>Collaborative action</b>                                                                                                                                                        | Health Promotion will require collaboration with NGOs.                                                                                                                             | Health Promotion logistics should be managed by managerial structure at frontline health facilities.                                                                                                                                                | Availability of existing managerial structures for Health Promotion that can be used to manage eye health promotion.                                         | 4                                                                                                                                                                                                              | 44.4 | 3     | 33.3 | 1        | 11.1 | 1                 | 11.1 |
|                                                                                                                                                                                    |                                                                                                                                                                                    | There is need for intersectoral action within government in trachoma endemic areas to implement water sanitation and hygiene programmes.                                                                                                            | Availability of intersectoral activities within government or partnerships between government and civil society.                                             | 6                                                                                                                                                                                                              | 66.7 | 3     | 33.3 | 0        | 0    | 0                 | 0    |
| <b>Usage characteristics</b>                                                                                                                                                       | Need for information and education                                                                                                                                                 | Eye health promotion could be effectively done in schools.                                                                                                                                                                                          | The availability of existing school health programmes.                                                                                                       | 3                                                                                                                                                                                                              | 33.3 | 4     | 44.4 | 1        | 11.1 | 1                 | 11.1 |
|                                                                                                                                                                                    |                                                                                                                                                                                    | Collaboration between communities and Front Line Health Facilities is required.                                                                                                                                                                     | The availability of collaborations with NGOs to provide health promotion                                                                                     | 1                                                                                                                                                                                                              | 11.1 | 6     | 66.7 | 2        | 22.2 | 0                 | 0    |
| <b>Ease of use</b>                                                                                                                                                                 | Need for supervision                                                                                                                                                               | Collaboration between communities and Front Line Health Facilities is required.                                                                                                                                                                     | Availability of collaboration between communities and frontline health communities is required.                                                              | 7                                                                                                                                                                                                              | 77.8 | 2     | 22.2 | 0        | 0    | 0                 | 0    |
|                                                                                                                                                                                    |                                                                                                                                                                                    | Information and education of the target population in the community is necessary.                                                                                                                                                                   | Communication channels with community that are available to inform target population                                                                         | 8                                                                                                                                                                                                              | 88.9 | 1     | 11.1 | 0        | 0    | 0                 | 0    |
| <b>Pre-existing demand</b>                                                                                                                                                         | Need for promotion                                                                                                                                                                 | Supervision of the Village Health Workers is important.                                                                                                                                                                                             | Staff who are available to supervise health promotion activities.                                                                                            | 8                                                                                                                                                                                                              | 88.9 | 1     | 11.1 | 0        | 0    | 0                 | 0    |
|                                                                                                                                                                                    |                                                                                                                                                                                    | The burden of ocular morbidity/BL/VI has been established in many setting in LMICs, but the demand for eye care services is low. Significant level of health promotion needed.                                                                      | Staff who are able to engage in health promotion which includes the uptake of eye care when required.                                                        | 8                                                                                                                                                                                                              | 88.9 | 1     | 11.1 | 0        | 0    | 0                 | 0    |
| <b>Black market risk</b>                                                                                                                                                           | Need to prevent resale/counterfeiting                                                                                                                                              | In some communities, itinerant couchers and traditional healers may compete with orthodox eye care practitioners for the patients. Need to limit harmful practices of traditional eye healers by engaging them in eye health prevention activities. | Staff who are able and willing to engage with traditional healers and train them to identify and refer eye conditions. A system that supports this training. | 7                                                                                                                                                                                                              | 77.8 | 2     | 22.2 | 0        | 0    | 0                 | 0    |

## Delphi Round 2 Facility Case Management

## Technical Capacity for facility-based intervention

| Category                         | Criteria                                                                                                                                   | Technical Complexity (elements that need to be addressed)                                                                                                                     | Technical Capacities (elements that need to be assessed)                                                                                     |   |       |       |          |      |                   |      |   |      |   |
|----------------------------------|--------------------------------------------------------------------------------------------------------------------------------------------|-------------------------------------------------------------------------------------------------------------------------------------------------------------------------------|----------------------------------------------------------------------------------------------------------------------------------------------|---|-------|-------|----------|------|-------------------|------|---|------|---|
|                                  |                                                                                                                                            |                                                                                                                                                                               | Strongly Agree                                                                                                                               |   | Agree |       | Disagree |      | Strongly disagree |      |   |      |   |
|                                  |                                                                                                                                            |                                                                                                                                                                               | n                                                                                                                                            | % | n     | %     | n        | %    | n                 | %    |   |      |   |
| Intervention characteristics     |                                                                                                                                            | Batteries for torches are not stable in hot climates. Will require frequent replacement.                                                                                      |                                                                                                                                              |   | 6     | 66.67 | 3        | 33.3 | 0                 | 0    | 0 | 0    |   |
|                                  |                                                                                                                                            |                                                                                                                                                                               |                                                                                                                                              |   | 8     | 88.89 | 1        | 11.1 | 0                 | 0    | 0 | 0    |   |
|                                  |                                                                                                                                            |                                                                                                                                                                               |                                                                                                                                              |   | 5     | 55.56 | 3        | 33.3 | 0                 | 0    | 0 | 0    |   |
|                                  |                                                                                                                                            | Stability/ease of storage/ease of transport                                                                                                                                   | Tetanus toxoid will require cold storage (refrigeration)                                                                                     |   |       | 6     | 66.67    | 2    | 22.2              | 0    | 0 | 0    | 0 |
|                                  |                                                                                                                                            |                                                                                                                                                                               | Topical antibiotic ointment does not need cold storage                                                                                       |   |       | 6     | 66.67    | 2    | 22.2              | 0    | 0 | 0    | 0 |
| Basic product design             |                                                                                                                                            | Injectable antibiotics for ophthalmia neonatorum will require cold storage                                                                                                    |                                                                                                                                              |   | 4     | 44.44 | 3        | 33.3 | 1                 | 11.1 | 0 | 0    |   |
|                                  |                                                                                                                                            |                                                                                                                                                                               |                                                                                                                                              |   | 4     | 44.44 | 3        | 33.3 | 1                 | 11.1 | 0 | 0    |   |
|                                  |                                                                                                                                            |                                                                                                                                                                               |                                                                                                                                              |   | 5     | 55.56 | 4        | 44.4 | 0                 | 0    | 0 | 0    |   |
|                                  |                                                                                                                                            | Standardizability                                                                                                                                                             | All the above consummables will be transported by pre existing PHC transport channels                                                        |   |       | 7     | 77.78    | 2    | 22.2              | 0    | 0 | 0    | 0 |
|                                  |                                                                                                                                            |                                                                                                                                                                               | The WHO AFROC PEC package as 5 algorithms for facility-based care with 12 protocols and 7 standards. Hence the intervention is standardized. |   |       | 6     | 66.67    | 3    | 33.3              | 0    | 0 | 0    | 0 |
| Supplies                         | Safety profile                                                                                                                             | None of the products cause any harm, if delivered correctly                                                                                                                   |                                                                                                                                              |   | 8     | 88.89 | 1        | 11.1 | 0                 | 0    | 0 | 0    |   |
|                                  | Need for regular supplies                                                                                                                  | Regular supplies of eye medication are needed.                                                                                                                                |                                                                                                                                              |   | 8     | 88.89 | 1        | 11.1 | 0                 | 0    | 0 | 0    |   |
|                                  | High-technology equipment and infrastructure needed                                                                                        | Diagnostic equipment needed: Snellen distance visual acuity chart; near visual acuity chart, torches and batteries.                                                           |                                                                                                                                              |   | 7     | 77.78 | 2        | 22.2 | 0                 | 0    | 0 | 0    |   |
| Equipment                        |                                                                                                                                            | Infrastructure: 6m distance to measure visual acuity.                                                                                                                         |                                                                                                                                              |   | 6     | 66.67 | 2        | 22.2 | 0                 | 0    | 0 | 0    |   |
|                                  |                                                                                                                                            | Space for counselling required.                                                                                                                                               |                                                                                                                                              |   | 8     | 88.89 | 1        | 11.1 | 0                 | 0    | 0 | 0    |   |
|                                  | Number of different types of equipment needed                                                                                              | One set of diagnostic equipment per facility is needed                                                                                                                        |                                                                                                                                              |   | 6     | 66.67 | 2        | 22.2 | 1                 | 11.1 | 0 | 0    |   |
| Delivery characteristics         | Maintenance needed                                                                                                                         | Torch batteries will need to be changed.                                                                                                                                      |                                                                                                                                              |   | 5     | 55.56 | 4        | 44.4 | 0                 | 0    | 0 | 0    |   |
|                                  |                                                                                                                                            |                                                                                                                                                                               |                                                                                                                                              |   |       |       |          |      |                   |      |   |      |   |
|                                  | First-level care                                                                                                                           | Diagnoses of management of uncomplicated cases can be delivered in Primary Health Centres and Health Posts.                                                                   |                                                                                                                                              |   | 6     | 66.67 | 3        | 33.3 | 0                 | 0    | 0 | 0    |   |
|                                  | Hospital care                                                                                                                              | Hospital services are needed for referrals, severe cases and treatment failures, further investigations and management, as required.                                          |                                                                                                                                              |   | 8     | 88.89 | 1        | 11.1 | 0                 | 0    | 0 | 0    |   |
|                                  | Skill level required for service provision                                                                                                 | Mid-level skill is required to make a diagnosis (eliciting a history; measuring visual acuity; basic eye examination)                                                         |                                                                                                                                              |   | 8     | 88.89 | 1        | 11.1 | 0                 | 0    | 0 | 0    |   |
| Human resources                  |                                                                                                                                            | Mid-level skill is required for management of some conditions e.g., eye irrigation; removal of foreign bodies; giving intramuscular injections (tetanus toxoid; antibiotics)  |                                                                                                                                              |   | 8     | 88.89 | 1        | 11.1 | 0                 | 0    | 0 | 0    |   |
|                                  |                                                                                                                                            | Mid-level skill is required for identifying which cases to refer and the level of urgency                                                                                     |                                                                                                                                              |   | 8     | 88.89 | 1        | 11.1 | 0                 | 0    | 0 | 0    |   |
|                                  | Skill level required for staff supervision. Degree of supervision required.                                                                | Primary Health Care supervisors need a good level of knowledge of eye conditions and their management and be skilled in the above. activity needed.                           |                                                                                                                                              |   | 6     | 66.67 | 3        | 33.3 | 0                 | 0    | 0 | 0    |   |
|                                  |                                                                                                                                            | Regular supervision of PEC required.                                                                                                                                          |                                                                                                                                              |   | 6     | 66.67 | 3        | 33.3 | 0                 | 0    | 0 | 0    |   |
|                                  | Intensity of professional services in terms of frequency or duration, e.g. on schedule /periodic or continuous to accommodate emergencies. | Primary Health Care workers trained in eye care should be available continuously to manage emergencies                                                                        |                                                                                                                                              |   | 8     | 88.89 | 1        | 11.1 | 0                 | 0    | 0 | 0    |   |
| Communication and Transport      |                                                                                                                                            | Managerial staff needed to manage supplies of consummables and plan purchasing                                                                                                |                                                                                                                                              |   | 6     | 66.67 | 3        | 33.3 | 0                 | 0    | 0 | 0    |   |
|                                  | Management and planning requirements. Need for managerial staff                                                                            | Managerial staff needed to establish and maintain referral and feedback mechanisms between the PH centre and eye department/clinic.                                           |                                                                                                                                              |   | 5     | 55.56 | 2        | 22.2 | 1                 | 11.1 | 0 | 0    |   |
|                                  |                                                                                                                                            | Managerial systems to coordinate staff rotations to ensure daily facility coverage by trained PEC staff.                                                                      |                                                                                                                                              |   | 7     | 77.78 | 2        | 22.2 | 0                 | 0    | 0 | 0    |   |
|                                  |                                                                                                                                            | Depends on communication to establish and maintain referral and feedback mechanisms between PH centres and eye department/clinic. Respond to feedback from referrals.         |                                                                                                                                              |   | 6     | 66.67 | 3        | 33.3 | 0                 | 0    | 0 | 0    |   |
|                                  |                                                                                                                                            | Transportation between PH Centre and referral centre imperative.                                                                                                              |                                                                                                                                              |   | 3     | 33.33 | 4        | 44.4 | 1                 | 11.1 | 0 | 0    |   |
| Government capacity requirements |                                                                                                                                            |                                                                                                                                                                               |                                                                                                                                              |   |       |       |          |      |                   |      |   |      |   |
|                                  | Need for regulation.                                                                                                                       | Appropriate medication & equipment need to be on the national essential drug list to facilitate availability.                                                                 |                                                                                                                                              |   | 6     | 66.67 | 2        | 22.2 | 0                 | 0    | 0 | 0    |   |
|                                  | Need for monitoring regulatory measures. Need for enforcement of regulation.                                                               | There is need for regulation of drug prescription and dispensing by appropriate staff.                                                                                        |                                                                                                                                              |   | 7     | 77.78 | 2        | 22.2 | 0                 | 0    | 0 | 0    |   |
|                                  |                                                                                                                                            | Measles is a notifiable condition and should be reported to appropriate regulatory authorities.                                                                               |                                                                                                                                              |   | 9     | 100   | 0        | 0    | 0                 | 0    | 0 | 0    |   |
|                                  |                                                                                                                                            | Ophthalmia neonatorum is a notifiable condition and should be reported                                                                                                        |                                                                                                                                              |   | 7     | 77.78 | 2        | 22.2 | 0                 | 0    | 0 | 0    |   |
| Management systems               | Need for sophisticated management systems                                                                                                  | No need for sophisticated management systems                                                                                                                                  |                                                                                                                                              |   | 7     | 77.78 | 2        | 22.2 | 0                 | 0    | 0 | 0    |   |
|                                  | Need for inter-sectoral action within government. Need for partnership between government and civil society.                               | Intersectoral action withingovernment or partnerships between government and civil society are desirable but not mandatory.                                                   |                                                                                                                                              |   | 6     | 66.67 | 3        | 33.3 | 0                 | 0    | 0 | 0    |   |
| Collaborative action             | Need for partnership between government and external funding agencies                                                                      | Need for partnerships between governments and NGOs.                                                                                                                           |                                                                                                                                              |   | 0     | 0     | 5        | 55.6 | 4                 | 44.4 | 0 | 0    |   |
|                                  |                                                                                                                                            | NGOs are responsible for the bulk of eye care in LMICs.                                                                                                                       |                                                                                                                                              |   | 1     | 11.11 | 5        | 55.6 | 2                 | 22.2 | 1 | 11.1 |   |
| Usage characteristics            |                                                                                                                                            |                                                                                                                                                                               |                                                                                                                                              |   |       |       |          |      |                   |      |   |      |   |
|                                  | Need for supervision                                                                                                                       | Outcomes of consultation at the PH Centre will be reassurance, treatment (and) or referral. At this level, prescribed treatments may not require supervision at home.         |                                                                                                                                              |   | 5     | 55.56 | 2        | 22.2 | 2                 | 22.2 | 0 | 0    |   |
|                                  |                                                                                                                                            | Referrals to secondary centres may require supervision to ensure compliance and may have to be supported.                                                                     |                                                                                                                                              |   | 4     | 44.44 | 4        | 44.4 | 1                 | 11.1 | 0 | 0    |   |
| Pre-existing demand              | Need for promotion                                                                                                                         | The burden of ocular morbidity(BLVI) has been established in many setting in LMICs but the demand for eye care services is low. Significant level of health promotion needed. |                                                                                                                                              |   | 4     | 44.44 | 4        | 44.4 | 1                 | 11.1 | 0 | 0    |   |
| Black market risk                | Need to prevent resale/counterfeiting                                                                                                      | Need to limit harmful practices of traditional eye healers by training them to identify and refer eye conditions.                                                             |                                                                                                                                              |   | 6     | 66.67 | 2        | 22.2 | 1                 | 11.1 | 0 | 0    |   |

# Reporting checklist for quality improvement study.

Based on the SQUIRE guidelines.

## Instructions to authors

Complete this checklist by entering the page numbers from your manuscript where readers will find each of the items listed below.

Your article may not currently address all the items on the checklist. Please modify your text to include the missing information. If you are certain that an item does not apply, please write "n/a" and provide a short explanation.

Upload your completed checklist as an extra file when you submit to a journal.

In your methods section, say that you used the SQUIRE reporting guidelines, and cite them as:

Ogrinc G, Davies L, Goodman D, Batalden P, Davidoff F, Stevens D. SQUIRE 2.0 (Standards for Quality Improvement Reporting Excellence): revised publication guidelines from a detailed consensus process

|                    | Reporting Item                                                                                                                                                                                                         | Page Number |
|--------------------|------------------------------------------------------------------------------------------------------------------------------------------------------------------------------------------------------------------------|-------------|
| <b>Title</b>       |                                                                                                                                                                                                                        |             |
| <a href="#">#1</a> | Indicate that the manuscript concerns an initiative to improve healthcare (broadly defined to include the quality, safety, effectiveness, patientcenteredness, timeliness, cost, efficiency, and equity of healthcare) | 1           |

|    |                     |                      |                                                                         |
|----|---------------------|----------------------|-------------------------------------------------------------------------|
| 1  | <b>Abstract</b>     |                      |                                                                         |
| 2  |                     |                      |                                                                         |
| 3  |                     |                      |                                                                         |
| 4  |                     | <a href="#">#02a</a> | Provide adequate information to aid in searching and indexing 2         |
| 5  |                     |                      |                                                                         |
| 6  |                     |                      |                                                                         |
| 7  |                     | <a href="#">#02b</a> | Summarize all key information from various sections of the 2            |
| 8  |                     |                      |                                                                         |
| 9  |                     |                      |                                                                         |
| 10 |                     |                      | text using the abstract format of the intended publication or a         |
| 11 |                     |                      |                                                                         |
| 12 |                     |                      | structured summary such as: background, local problem,                  |
| 13 |                     |                      |                                                                         |
| 14 |                     |                      | methods, interventions, results, conclusions                            |
| 15 |                     |                      |                                                                         |
| 16 |                     |                      |                                                                         |
| 17 | <b>Introduction</b> |                      |                                                                         |
| 18 |                     |                      |                                                                         |
| 19 |                     |                      |                                                                         |
| 20 | Problem             | <a href="#">#3</a>   | Nature and significance of the local problem 3                          |
| 21 |                     |                      |                                                                         |
| 22 | description         |                      |                                                                         |
| 23 |                     |                      |                                                                         |
| 24 |                     |                      |                                                                         |
| 25 | Available           | <a href="#">#4</a>   | Summary of what is currently known about the problem, 3                 |
| 26 |                     |                      |                                                                         |
| 27 | knowledge           |                      | including relevant previous studies                                     |
| 28 |                     |                      |                                                                         |
| 29 |                     |                      |                                                                         |
| 30 |                     |                      |                                                                         |
| 31 | Rationale           | <a href="#">#5</a>   | Informal or formal frameworks, models, concepts, and / or 3             |
| 32 |                     |                      |                                                                         |
| 33 |                     |                      | theories used to explain the problem, any reasons or                    |
| 34 |                     |                      |                                                                         |
| 35 |                     |                      | assumptions that were used to develop the intervention(s),              |
| 36 |                     |                      |                                                                         |
| 37 |                     |                      | and reasons why the intervention(s) was expected to work                |
| 38 |                     |                      |                                                                         |
| 39 |                     |                      |                                                                         |
| 40 |                     |                      |                                                                         |
| 41 | Specific aims       | <a href="#">#6</a>   | Purpose of the project and of this report 4                             |
| 42 |                     |                      |                                                                         |
| 43 |                     |                      |                                                                         |
| 44 | <b>Methods</b>      |                      |                                                                         |
| 45 |                     |                      |                                                                         |
| 46 |                     |                      |                                                                         |
| 47 | Context             | <a href="#">#7</a>   | Contextual elements considered important at the outset of 4             |
| 48 |                     |                      |                                                                         |
| 49 |                     |                      | introducing the intervention(s)                                         |
| 50 |                     |                      |                                                                         |
| 51 |                     |                      |                                                                         |
| 52 | Intervention(s)     | <a href="#">#08a</a> | Description of the intervention(s) in sufficient detail that others 4-8 |
| 53 |                     |                      |                                                                         |
| 54 |                     |                      | could reproduce it                                                      |
| 55 |                     |                      |                                                                         |
| 56 |                     |                      |                                                                         |
| 57 |                     |                      |                                                                         |
| 58 | Intervention(s)     | <a href="#">#08b</a> | Specifics of the team involved in the work 4,6,8                        |
| 59 |                     |                      |                                                                         |
| 60 |                     |                      |                                                                         |

|    |                 |                      |                                                                   |       |
|----|-----------------|----------------------|-------------------------------------------------------------------|-------|
| 1  | Study of the    | <a href="#">#09a</a> | Approach chosen for assessing the impact of the                   | 'n/a' |
| 2  |                 |                      |                                                                   |       |
| 3  | Intervention(s) |                      | intervention(s)                                                   |       |
| 4  |                 |                      |                                                                   |       |
| 5  |                 |                      |                                                                   |       |
| 6  | Study of the    | <a href="#">#09b</a> | Approach used to establish whether the observed outcomes          | 'n/a' |
| 7  |                 |                      |                                                                   |       |
| 8  | Intervention(s) |                      | were due to the intervention(s)                                   |       |
| 9  |                 |                      |                                                                   |       |
| 10 |                 |                      |                                                                   |       |
| 11 | Measures        | <a href="#">#10a</a> | Measures chosen for studying processes and outcomes of the        | 4     |
| 12 |                 |                      |                                                                   |       |
| 13 |                 |                      | intervention(s), including rationale for choosing them, their     |       |
| 14 |                 |                      |                                                                   |       |
| 15 |                 |                      | operational definitions, and their validity and reliability       |       |
| 16 |                 |                      |                                                                   |       |
| 17 | Measures        | <a href="#">#10b</a> | Description of the approach to the ongoing assessment of          | 5-6   |
| 18 |                 |                      |                                                                   |       |
| 19 |                 |                      | contextual elements that contributed to the success, failure,     |       |
| 20 |                 |                      |                                                                   |       |
| 21 |                 |                      | efficiency, and cost                                              |       |
| 22 |                 |                      |                                                                   |       |
| 23 |                 |                      |                                                                   |       |
| 24 |                 |                      |                                                                   |       |
| 25 | Measures        | <a href="#">#10c</a> | Methods employed for assessing completeness and accuracy          | 7     |
| 26 |                 |                      |                                                                   |       |
| 27 |                 |                      | of data                                                           |       |
| 28 |                 |                      |                                                                   |       |
| 29 |                 |                      |                                                                   |       |
| 30 | Analysis        | <a href="#">#11a</a> | Qualitative and quantitative methods used to draw inferences      | 7     |
| 31 |                 |                      |                                                                   |       |
| 32 |                 |                      | from the data                                                     |       |
| 33 |                 |                      |                                                                   |       |
| 34 |                 |                      |                                                                   |       |
| 35 | Analysis        | <a href="#">#11b</a> | Methods for understanding variation within the data, including    | 'n/a' |
| 36 |                 |                      |                                                                   |       |
| 37 |                 |                      | the effects of time as a variable                                 |       |
| 38 |                 |                      |                                                                   |       |
| 39 |                 |                      |                                                                   |       |
| 40 | Ethical         | <a href="#">#12</a>  | Ethical aspects of implementing and studying the                  | 7, 23 |
| 41 |                 |                      |                                                                   |       |
| 42 | considerations  |                      | intervention(s) and how they were addressed, including, but       |       |
| 43 |                 |                      |                                                                   |       |
| 44 |                 |                      | not limited to, formal ethics review and potential conflict(s) of |       |
| 45 |                 |                      |                                                                   |       |
| 46 |                 |                      | interest                                                          |       |
| 47 |                 |                      |                                                                   |       |
| 48 |                 |                      |                                                                   |       |
| 49 |                 |                      |                                                                   |       |
| 50 |                 |                      |                                                                   |       |
| 51 |                 |                      |                                                                   |       |
| 52 |                 |                      |                                                                   |       |
| 53 | <b>Results</b>  |                      |                                                                   |       |
| 54 |                 |                      |                                                                   |       |
| 55 |                 |                      |                                                                   |       |
| 56 |                 |                      |                                                                   |       |
| 57 |                 |                      |                                                                   |       |
| 58 |                 |                      |                                                                   |       |
| 59 |                 |                      |                                                                   |       |
| 60 |                 |                      |                                                                   |       |

|    |                   |                      |                                                                    |       |
|----|-------------------|----------------------|--------------------------------------------------------------------|-------|
| 1  |                   | <a href="#">#13a</a> | Initial steps of the intervention(s) and their evolution over time | 9-10  |
| 2  |                   |                      | (e.g., time-line diagram, flow chart, or table), including         |       |
| 3  |                   |                      | modifications made to the intervention during the project          |       |
| 4  |                   |                      |                                                                    |       |
| 5  |                   |                      |                                                                    |       |
| 6  |                   |                      |                                                                    |       |
| 7  |                   |                      |                                                                    |       |
| 8  |                   |                      |                                                                    |       |
| 9  |                   | <a href="#">#13b</a> | Details of the process measures and outcome                        | 11-20 |
| 10 |                   |                      |                                                                    |       |
| 11 |                   |                      |                                                                    |       |
| 12 |                   | <a href="#">#13c</a> | Contextual elements that interacted with the intervention(s)       | 'n/a' |
| 13 |                   |                      |                                                                    |       |
| 14 |                   |                      |                                                                    |       |
| 15 |                   | <a href="#">#13d</a> | Observed associations between outcomes, interventions, and         | 'n/a' |
| 16 |                   |                      | relevant contextual elements                                       |       |
| 17 |                   |                      |                                                                    |       |
| 18 |                   |                      |                                                                    |       |
| 19 |                   |                      |                                                                    |       |
| 20 |                   | <a href="#">#13e</a> | Unintended consequences such as unexpected benefits,               | 'n/a' |
| 21 |                   |                      | problems, failures, or costs associated with the                   |       |
| 22 |                   |                      | intervention(s).                                                   |       |
| 23 |                   |                      |                                                                    |       |
| 24 |                   |                      |                                                                    |       |
| 25 |                   |                      |                                                                    |       |
| 26 |                   |                      |                                                                    |       |
| 27 |                   |                      |                                                                    |       |
| 28 |                   | <a href="#">#13f</a> | Details about missing data                                         | 'n/a' |
| 29 |                   |                      |                                                                    |       |
| 30 |                   |                      |                                                                    |       |
| 31 | <b>Discussion</b> |                      |                                                                    |       |
| 32 |                   |                      |                                                                    |       |
| 33 |                   |                      |                                                                    |       |
| 34 | Summary           | <a href="#">#14a</a> | Key findings, including relevance to the rationale and specific    | 20-22 |
| 35 |                   |                      | aims                                                               |       |
| 36 |                   |                      |                                                                    |       |
| 37 |                   |                      |                                                                    |       |
| 38 |                   |                      |                                                                    |       |
| 39 | Summary           | <a href="#">#14b</a> | Particular strengths of the project                                | 21    |
| 40 |                   |                      |                                                                    |       |
| 41 |                   |                      |                                                                    |       |
| 42 | Interpretation    | <a href="#">#15a</a> | Nature of the association between the intervention(s) and the      | 21    |
| 43 |                   |                      | outcomes                                                           |       |
| 44 |                   |                      |                                                                    |       |
| 45 |                   |                      |                                                                    |       |
| 46 |                   |                      |                                                                    |       |
| 47 |                   |                      |                                                                    |       |
| 48 | Interpretation    | <a href="#">#15b</a> | Comparison of results with findings from other publications        | 21    |
| 49 |                   |                      |                                                                    |       |
| 50 |                   |                      |                                                                    |       |
| 51 | Interpretation    | <a href="#">#15c</a> | Impact of the project on people and systems                        | 21    |
| 52 |                   |                      |                                                                    |       |
| 53 |                   |                      |                                                                    |       |
| 54 | Interpretation    | <a href="#">#15d</a> | Reasons for any differences between observed and                   | 'n/a' |
| 55 |                   |                      | anticipated outcomes, including the influence of context           |       |
| 56 |                   |                      |                                                                    |       |
| 57 |                   |                      |                                                                    |       |
| 58 |                   |                      |                                                                    |       |
| 59 |                   |                      |                                                                    |       |
| 60 |                   |                      |                                                                    |       |

|    |                    |                      |                                                               |       |
|----|--------------------|----------------------|---------------------------------------------------------------|-------|
| 1  | Interpretation     | <a href="#">#15e</a> | Costs and strategic trade-offs, including opportunity costs   | 'n/a' |
| 2  |                    |                      |                                                               |       |
| 3  |                    |                      |                                                               |       |
| 4  | Limitations        | <a href="#">#16a</a> | Limits to the generalizability of the work                    | 21    |
| 5  |                    |                      |                                                               |       |
| 6  |                    |                      |                                                               |       |
| 7  | Limitations        | <a href="#">#16b</a> | Factors that might have limited internal validity such as     | 21    |
| 8  |                    |                      | confounding, bias, or imprecision in the design, methods,     |       |
| 9  |                    |                      | measurement, or analysis                                      |       |
| 10 |                    |                      |                                                               |       |
| 11 |                    |                      |                                                               |       |
| 12 |                    |                      |                                                               |       |
| 13 |                    |                      |                                                               |       |
| 14 |                    |                      |                                                               |       |
| 15 | Limitations        | <a href="#">#16c</a> | Efforts made to minimize and adjust for limitations           | 21    |
| 16 |                    |                      |                                                               |       |
| 17 |                    |                      |                                                               |       |
| 18 | Conclusion         | <a href="#">#17a</a> | Usefulness of the work                                        | 22    |
| 19 |                    |                      |                                                               |       |
| 20 |                    |                      |                                                               |       |
| 21 | Conclusion         | <a href="#">#17b</a> | Sustainability                                                | 21    |
| 22 |                    |                      |                                                               |       |
| 23 |                    |                      |                                                               |       |
| 24 | Conclusion         | <a href="#">#17c</a> | Potential for spread to other contexts                        | 21    |
| 25 |                    |                      |                                                               |       |
| 26 |                    |                      |                                                               |       |
| 27 | Conclusion         | <a href="#">#17d</a> | Implications for practice and for further study in the field  | 21    |
| 28 |                    |                      |                                                               |       |
| 29 |                    |                      |                                                               |       |
| 30 | Conclusion         | <a href="#">#17e</a> | Suggested next steps                                          | 22    |
| 31 |                    |                      |                                                               |       |
| 32 |                    |                      |                                                               |       |
| 33 | <b>Other</b>       |                      |                                                               |       |
| 34 |                    |                      |                                                               |       |
| 35 | <b>information</b> |                      |                                                               |       |
| 36 |                    |                      |                                                               |       |
| 37 |                    |                      |                                                               |       |
| 38 |                    |                      |                                                               |       |
| 39 | Funding            | <a href="#">#18</a>  | Sources of funding that supported this work. Role, if any, of | 24    |
| 40 |                    |                      | the funding organization in the design, implementation,       |       |
| 41 |                    |                      | interpretation, and reporting                                 |       |
| 42 |                    |                      |                                                               |       |
| 43 |                    |                      |                                                               |       |
| 44 |                    |                      |                                                               |       |
| 45 |                    |                      |                                                               |       |
| 46 |                    |                      |                                                               |       |

The SQUIRE 2.0 checklist is distributed under the terms of the Creative Commons Attribution License CC BY-NC 4.0. This checklist was completed on 18. July 2020 using <https://www.goodreports.org/>, a tool made by the [EQUATOR Network](#) in collaboration with [Penelope.ai](#)
